# Supplementary material
Source: publisher figshare collection journal article supplement (https://gsajournals.figshare.com/ndownloader/files/21211533)
Supplement: Supplementary file 1 [file 21211533]

## Sheet: Sheet1
Gene number	Gene symbol	Gene description or link to locus	male_testes	male_carcass	NBF_carcass	PBM_carcass_12hr	PBM_carcass_24hr	PBM_carcass_36hr	PBM_carcass_48hr	PBM_carcass_60hr	PBM_carcass_72hr	NBF_Ovaries	PBM_Ovaries_12hr	PBM_Ovaries_24hr	PBM_Ovaries_36hr	PBM_Ovaries_48hr	PBM_Ovaries_60hr	PBM_Ovaries_72hr	diapause_0_1_wk	diapause_1_2_wk	diapause_2_3_wk	diapause_3_4_wk	Embryo_0_1	Embryo_0_4	Embryo_4_8	Embryo_8_12	Embryo_12_16	Embryo_16_20	Embryo_20_24	Embryo_24_28	Embryo_28_32	Embryo_32_36	Embryo_36_40	Embryo_40_44	Embryo_44_48	Embryo_48_52	Embryo_52_56	Embryo_56_60	Embryo_60_64	Embryo_64_68	Embryo_68_72	1st_instar_larvae	2nd_instar_larvae	3rd_instar_larvae	4th_instar_larvae	pupae_male_early	pupae_female_early	pupae_male_late	pupae_female_late
gene10113	LOC109413486	uncharacterized LOC109413486%2C transcript variant X1	0.598365	0.792551	0.738575	0.539436	0.300047	0.514767	2.02721	1.00873	0.679781	23.987	13.6694	16.2517	11.7906	15.4335	19.8504	18.5764	3.98951	1.77467	2.09078	1.73238	16.1139	5.89409	4.30263	1.06454	0.432531	0.529249	0.302777	0.272024	0.30639	0.392503	0.56976	0.849632	1.58254	0.421102	1.10124	1.21344	1.47323	0.956139	1.60677	0.354411	0.381083	0.245814	0.216181	0.786298	0.34858	0.41055	0.131146
gene1019	LOC109622494	proto-oncogene serine/threonine-protein kinase mos-like	0.0712647	0.030042	0	0.0380596	0	0.0381735	0.632728	1.45702	0	32.0041	53.5924	35.8931	39.1996	16.2007	19.7468	20.2695	0.179193	0	0.241151	0.0745277	19.9952	8.3563	5.19531	1.14923	1.09648	0.945477	0.714886	0.772888	0.904151	0.60151	0.18664	0.254106	0.126383	1.03534	0.132095	0.135545	0.192871	0.246405	0.0554394	0.0263798	0	0	0	0	0	0.023124	0.15654
gene10325	LOC109413684	vitellogenin-A1-like	0.0681685	0.0192503	0.0378455	5364.12	16917.4	711.308	11.8461	3.40374	7.22671	0.0298835	62.0698	4.18332	1.67309	0.0412249	2.59536	0.732625	0.0142381	0.00937393	0.00822069	0.00955115	0	0.00565869	0.00505357	7.24401	0.00617669	0.0177319	0.00132778	0.0253459	0.00300966	0.0113851	25.9427	0.0177628	1.01904	0.0353638	0.0319953	0.0347418	0.00482719	0.00730416	0.00234461	13.22	0.015183	0.0217768	0.0297404	0.0715442	1.23579	0.776903	0.302163
gene10326	LOC109413685	vitellogenin-A1	1.57392	0.0255873	0.11571	3541.67	10313.5	350.555	7.08786	3.37863	4.71031	0.0530968	49.1515	3.25555	1.32363	0.0132613	1.73013	0.415434	0.158193	0.040635	0.0658939	0.051195	0	0.00593176	0.00884673	4.59921	0	0	0	0.0151904	0.00208223	0.0103806	15.6477	0.0454948	0.42825	0.00978002	0.0226553	0.0375439	0.0304827	0.0134135	0.0521341	8.02232	0.0127326	0.031768	0.0436457	0.168465	0.858571	5.63514	0.704837
gene10335	LOC109413693	vitellogenin-A1	0.318129	0.0391399	0.0886826	7445.29	16244.3	2486.95	100.399	11.2059	9.75985	0.0329114	77.4915	4.35002	1.76413	0.0162282	3.42196	0.990231	0.62814	0.03819	0.322538	0.116517	0.00282238	0.0143816	0.00642187	9.46047	0.059653	0.0570836	0.141732	0.100253	0.0948489	0.0929554	25.2255	0.218679	3.72262	0.256542	0.288724	0.206582	0.196117	0.20473	0.182955	13.6581	0.0246963	0.05682	0.154195	1.04027	3.04546	26.8395	10.7295
gene10406	LOC109413763	vitellogenin-A1	0.182828	0.0234309	0.0436973	4767.7	9812.26	1654.09	69.234	9.57628	8.28513	0.032837	54.5633	2.89877	1.61195	0.0371192	2.00263	0.682304	0.300616	0.0452526	0.221498	0.0452098	0.002816	0.00286983	0.00640736	6.25769	0.040723	0.0329737	0.060605	0.0669966	0.0763182	0.0656796	15.4761	0.146118	2.47753	0.121833	0.164097	0.110009	0.146475	0.10957	0.124889	7.83207	0.00924018	0.0528853	0.111614	0.485647	2.06117	15.8264	8.18813
gene10433	LOC109413809	xanthine dehydrogenase 1-like	0	0.0350025	0	0	0.00822343	0	0.136065	0.905307	0.0127765	0.00438765	0.02114	0	32.4583	6.13679	0.103931	0.0963116	0.0115604	0	0	0.0056094	0	0	0.00445196	0.0192218	0.0108828	0	0.0327519	0.00478128	0.00349981	0	0.00263394	0.0208642	0.00789526	0	0.00497114	0.0111294	0	0.00483806	0	0	0.0160506	0.0250448	0.00523997	0	0.0109184	0	0.0128533
gene10542	LOC109413933	vitellogenin-1	0.139085	0.0183225	0.0750447	0	0	0.0232818	4.56951	0.801506	0.0862751	14.0794	20.0464	21.1431	36.8397	47.8889	44.6066	56.2343	1.79546	0.285105	3.2651	0.272724	71.3465	86.2849	65.4521	3.45262	15.2266	23.6282	36.0178	50.9478	43.8428	27.5425	13.0621	10.1581	3.353	86.5679	4.95469	2.9009	2.71243	8.72935	1.47083	0	0.130061	0.487062	1.20304	0.0240282	0.250675	0.141032	0.121511
gene10603	LOC109414011	uncharacterized LOC109414011	0	1.61508	89.5463	23.5841	34.3411	155.241	84.7128	194.37	137.049	1.29208	0	0	0	0	0.0539061	0.0502873	0	0	0	0	0	0	0	0.0602177	0	0	0.0586312	0	0	0	0.132025	0	0.327802	0.0925103	0	0.104598	0.0642036	0.0909396	0.0392166	0.149284	0.100566	0	0	0	0.13682	0	1.00666
gene10800	LOC109414222	venom allergen 5-like	1.17813	2.18762	112.388	61.646	68.9345	51.8573	196.671	307.471	236.586	0.650133	0.415173	0.249003	0.116613	0.0612862	0.149978	0.349775	0	0	0.0237301	0.048892	0.149222	0.13035	0.194018	0.104712	0	0.0453846	0	0	0	0.136594	0.183661	0.0227318	0.0829105	0.214486	0.0433288	0	0.044657	0.0210845	0	0.155752	0.116582	0.130975	0.11418	0.0193842	0.0951654	0.204793	2.94079
gene10801	LOC109414221	venom allergen 5 2-like%2C transcript variant X2	0.35957	0.505263	43.51	15.1025	20.5194	11.757	20.4807	71.2022	53.6494	0.0204258	0.0211186	0.0613817	0	0	0	0	0	0	0.0506975	0.0522269	0	0	0	0.0447415	0	0.0242401	0	0	0	0	0.0490471	0	0	0.0229116	0	0.077716	0.047703	0	0	0.0554587	0	0	0	0.0414128	0	0	0.329097
gene10916	LOC109414358	uncharacterized histidine-rich protein DDB_G0274557	0	0	0	0	0.0517792	0.0542731	0.228464	28.6762	0.32179	0.055254	0.199949	0.41511	1048.04	274.363	0.0541725	0.151607	0	0	0	0	0	0.0313885	0.14016	0	0	0	0.117842	0.301055	0	0	0	0.131372	0	0	0	0.105115	0	0	0	0.150022	0.022234	0	0	0	0	0	0
gene10917	LOC109414359	vitelline membrane protein 15a-1	0.0469477	0	0	0	0.0599809	0	13.1665	34.9123	1.16488	0	0.363974	0.416747	1160.18	1632.67	0.564779	0.175622	0	0.0905757	0	0	0	0.109081	0.292249	0	0	0	0.102381	0.871853	0	0	0	0.152181	0	0	0	0	0	0	0	0	0	0	0	0	0	0	0
gene10918	LOC109414339	extensin-like	0.0969617	0	0	0	0.017697	0.0185494	0.0976054	3.53999	0	23.1432	95.0488	400.409	115.851	1.19541	1.52749	0.604523	0.398053	0	0.105463	0.0241432	0	0	0.0191615	0	0	0.0448224	0.0805519	0.0514472	0	0.0449674	0	0.0561255	0.0511771	0	0	0.167655	0.121286	0	0.0808179	0	0	0.0754559	0.112766	0.0382881	0.21147	0	0.497891
gene11262	LOC109414728	uncharacterized LOC109414728	0.169076	0.71275	181.889	60.4424	66.9912	105.199	162.759	349.555	171.708	0.288138	0	0.0144314	0	0	0.0141249	0.0263533	0	0	0.0357583	0	0	0	0	0.0946722	0	0.0170972	0	0	0	0.034305	0.155674	0.0513808	0.171786	0.129281	0	0	0	0	0.0411033	0.352049	0	0.0164469	0	0.219071	0.197178	0.0342886	0.337631
gene11325	LOC109414798	sodium/potassium/calcium exchanger 3%2C transcript variant X3	0.344496	0.037237	0.0762573	0.0353811	0.0112854	0.0414015	1.73036	0.867573	0.00876691	26.4099	21.0987	19.9346	19.1214	21.6246	26.3534	28.0997	1.49924	8.21419	3.38511	7.49023	25.8313	6.43759	3.56193	0.461633	0.589931	0.836062	0.391682	0.446189	0.371138	0.293927	0.571121	0.544028	0.372048	0.607877	0.266064	0.840039	1.33594	0.637394	1.31421	7.31612	4.36871	10.7166	11.477	0.0488329	0.0749193	0.014331	0.0793765
gene11351	LOC109414827	oviduct-specific glycoprotein	0.0164332	0	0	0	0	0.0220065	0.625301	1.89401	0.163098	0	0.0115821	0.0224424	71.0099	128.649	0.186709	0.0307367	0.0147575	0.0158523	0	0	0	0.038182	0	0	0	0.013294	0	0.0976569	0	0	0	0.0266343	0	0	0	0.0142073	0.0130809	0	0	0	0	0	0	0	0	0	0
gene1169	LOC109411961	cell surface glycoprotein 2-like	0	0	0	0	0	0	0.475516	12.1123	0.730649	0	0.129714	0.0209453	409.078	587.424	0.123003	0	0.0275461	0	0	0	0	0.0475132	0.0848647	0	0	0.0496287	0.0222974	0.182285	0	0	0	0.0248576	0.022666	0	0	0	0	0	0	0	0	0	0	0	0	0	0
gene11784	LOC109404351	uncharacterized LOC109404351	0.0413455	0	0	0	0	0	0.174804	6.81639	0.266728	0	0.116561	0.0846964	220.266	401.416	0.0276325	0	0	0	0.0174885	0	0.0314209	0.0640431	0.0714932	0	0	0	0.0601093	0.16892	0	0	0	0.0335055	0	0	0	0.0893625	0.0329111	0	0.0804105	0.0191309	0	0	0	0	0	0	0
gene11785	LOC109404303	cell wall protein DAN4-like	0.0172394	0	0	0	0	0	0.170067	1.36492	0	0	0.0243005	0.0353149	43.6352	87.7186	0.115216	0.0322445	0	0	0	0.0600957	0	0.0667583	0.0238478	0	0	0	0	0.0640296	0	0	0	0	0	0	0	0	0	0	0	0	0	0	0	0.0238261	0	0	0
gene11786	LOC109622602	location of vulva defective 1-like	0.776232	0	0	0.0996524	0	0.0399803	175.542	1.60557	1.09634	0	0.0420835	0.0407722	96.111	1738.48	1.3169	0.167523	0.0536213	0	0.0252565	0.208147	0	0	0.185848	0.0445786	0	0.0724556	0.0868083	0.731849	0	0.04846	0	0.0483878	0.0441216	0.152036	0.0461157	0	0	0	0	0	0	0	0	0	0.0506432	0.0242184	0
gene11787	LOC109622611	uncharacterized LOC109622611	0	0	0	0.0860955	0	0.0863532	88.0595	2.02475	1.43999	0	0.11362	0.0440318	85.6107	984.196	0.172386	0.201017	0	0	0	0	0	0.149826	0.0892025	0	0	0.156496	0.0703113	0.455055	0	0	0	0	0	0.0902309	0	0	0	0	0	0.0596745	0	0	0	0	0	0	0
gene1190	LOC109410704	chorion peroxidase-like	0.569666	0.156182	0	0.0263819	0.00416542	0.0661521	15.8704	3.42596	0.166695	66.1175	75.3768	89.2616	73.0731	146.67	161.22	157.021	8.41677	0.492343	10.6786	1.02753	419.816	570.28	334.073	25.2999	20.5714	35.116	12.9965	17.1218	10.7331	11.2897	7.59797	16.5198	7.37097	37.3741	5.64649	7.08942	5.69108	12.0649	3.0872	0.0365716	0.0300569	0.0845729	0	0.0273091	0	0.0160289	0.203801
gene12039	LOC109415463	uncharacterized LOC109415463	0.254489	0	0	0	0	0.0378664	3.90529	1.9741	0	17.0009	32.7568	31.3758	37.745	44.9599	39.9884	48.0931	0.761792	0.245491	0.502342	0.246427	48.5437	14.6291	3.22705	1.3722	0.693231	0.686246	0.246655	0.27306	0.396023	0.183591	0.115712	0.206232	0.18805	0.432424	0.196548	0.19557	0.157557	0.318811	0.08249	0.10467	0	0	0	0	0	0	0.0282329
gene12054	LOC109415470	uncharacterized LOC109415470	0.983415	0	0.167486	0	0.0372964	0	0.0137135	0.319997	0.0295767	1.37971	6.94051	5.53404	3.99398	24.2985	1.49496	3.75231	1.67287	0.114401	0.463046	0.0524716	7.10149	8.03186	8.01973	2.174	1.33316	0.543161	1.16402	0.748581	1.43899	0.554789	0.340458	0.235089	0.50692	0.968656	0.399252	0.228194	0.411006	0.506504	0.263173	0.12607	0.0227487	0.0212977	0.0242603	0.110951	0.0557088	0.101137	0.0242894
gene12234	LOC109415669	serine protease gd-like	0.0877547	0.0616558	0.0252529	0.224567	0.0186861	0.0293791	2.11273	1.23129	0.130644	19.8105	15.1531	11.8745	19.4133	28.1921	25.4636	28.0035	1.2609	0.197522	1.28679	0.267671	28.9324	44.3357	47.5561	4.24764	2.26269	3.52588	1.5097	2.10771	1.952	1.36506	0.825941	2.00306	0.92944	2.72874	0.892375	1.02421	1.03615	1.30823	0.711121	0.121815	0	0.0113818	0	0	0	0	0.102223
gene12240	LOC109415673	serine protease gd	0.669682	0.244859	0.54274	0.136856	0.0873055	0.283682	3.17803	1.71215	0.786733	24.0644	27.0286	27.5521	34.033	47.4177	46.3463	57.8343	0.576846	0.10547	0.878701	0.0238213	44.9798	34.6761	34.6925	6.71394	5.41876	5.38436	3.97389	4.25379	3.59178	3.63816	2.79636	2.69133	1.49465	6.58365	1.80497	1.59512	1.41426	2.10593	1.24927	0.075886	0.079522	0.116993	0.0778834	0.0849997	0.0811417	0.188473	0.463961
gene12341	LOC109415794	general odorant-binding protein 45-like	0.0337063	0	0.0108577	0	0	0	19.0225	0.0796624	0.180747	0	0	0	8.88188	104.589	0.202743	0.0752767	0	0	0	0	0	0	0	0	0	0.0406976	0	0.0216747	0	0	0	0	0	0	0	0	0	0.0124786	0	0	0	0	0	0	0	0	0
gene12637	LOC109416101	membrane alanyl aminopeptidase-like	0.0556574	0.527911	1.58562	2.22933	0.462205	0.204967	2.23547	2.34278	2.59625	18.3441	13.6118	16.057	10.2137	15.451	23.1183	20.4559	0.199927	1.36909	2.23651	1.26113	22.5022	17.6519	14.4939	2.72172	2.4467	2.27377	1.69924	2.04653	1.05462	0.654977	0.70605	0.76676	1.43944	2.17043	0.945685	1.99691	2.5696	0.8367	3.57208	0.721089	6.70822	12.8855	8.45037	0.0769228	0.0708089	1.55765	2.22286
gene12774	LOC109416267	30 kDa salivary gland allergen Aed a 3	0.132832	2.93981	403.73	186.739	207.768	192.041	549.738	1035.36	631.217	0.887377	0.318308	0.0544216	0.0473324	0.0290216	0.124287	0.132506	0	0.102509	0	0.0926097	0	0	0.0183751	0.138839	0.0449178	0.0644745	0	0.118406	0.0437734	0.0431221	0.565312	0	0.157046	0.710977	0	0	0	0.0399375	0	0.565457	0.0441653	0.0413482	0.0216276	0	0.247857	0.624972	29.4698
gene12775	LOC109416268	30 kDa salivary gland allergen Aed a 3-like	0	0.341135	243.798	108.38	117.035	135.58	298.669	538.698	346.462	0.612924	0.304183	0	0	0.0785789	0.0480741	0.0672703	0	0.0693884	0	0	0	0	0	0.214812	0	0.0581904	0.0784321	0	0	0	0.147177	0	0.292338	0.385009	0.0277773	0	0	0	0	0.29955	0	0.0279886	0	0	0.0915132	0.0291754	18.2424
gene12780	LOC109416270	uncharacterized LOC109416270	0.8008	0	0	0	0	0.0214478	6.13938	6.29217	0.22254	129.266	281.975	142.347	156.372	106.096	67.0713	101.552	0.51778	0.154498	0.948433	0.307071	74.514	29.646	7.68794	2.39146	1.67892	1.45112	1.14094	1.2611	1.42503	0.909886	0.209727	1.09024	0.331372	2.86565	0.272131	0.830792	0.458956	1.03531	0.498377	0.118572	0	0.0498548	0.026077	0	0	0	0.575686
gene12795	LOC109416278	zinc finger protein 281-like%2C transcript variant X1	0.0861666	0.0301944	0	0.0359517	0.00921982	0.0624547	15.2905	3.6989	0.081885	71.1826	57.2353	86.5351	90.3181	116.885	125.546	127.33	5.30691	0.592232	6.36003	0.738355	142.002	178.334	363.898	238.795	9.34514	15.6867	7.86079	8.80627	12.6417	4.14643	2.80322	8.53921	3.47533	7.98323	3.41894	3.62548	2.89496	5.28938	1.64438	0.0797401	0.0567616	0.0251457	0.0145556	0	0.0151646	0	0.218741
gene12801	LOC109416281	uncharacterized LOC109416281	0.0540078	0	0.0233125	0	0	0.0271216	2.93035	1.28553	0.0268011	24.5377	20.3931	17.4988	24.1601	38.8286	40.6101	42.0115	1.11551	0.130246	1.16507	0.247103	49.9794	69.2171	51.1769	3.04427	1.80347	3.88848	1.3937	1.5546	1.44606	1.08484	0.55252	1.30206	0.728322	1.73444	0.490112	0.77042	0.537379	1.40053	0.420147	0.0374849	0.0336694	0	0	0	0	0	0.0269623
gene12802	LOC109416283	replication initiator 1%2C transcript variant X3	0.0147221	0	0	0	0	0.0295725	2.00465	0.753372	0.0438345	16.1498	17.591	20.4999	24.7218	37.3683	42.164	38.7729	0.887909	0.189449	1.66266	0.397734	53.4741	57.7486	47.5663	3.50511	2.50658	5.97272	1.87643	2.66466	2.16303	0.894206	0.793304	2.13364	1.04804	3.85935	0.973975	1.10732	0.906331	1.18029	0.761041	0.0272481	0.0122373	0	0	0.0101735	0	0	0.0587974
gene12803	LOC109416285	uncharacterized LOC109416285	0.0152514	0.0160733	0	0	0	0.0102119	3.38054	1.22282	0.0756846	18.9051	26.4047	20.6503	25.9832	48.1263	45.3194	46.0277	1.82379	0.441367	2.35466	0.327768	71.2218	85.4005	63.171	5.23665	4.10008	6.88039	2.9306	2.94379	3.35481	2.30228	1.45418	3.24015	1.5665	6.58703	1.42127	1.22625	0.882105	1.89542	0.373143	0.0282279	0	0	0	0	0	0	0.0304558
gene12804	LOC109416279	zinc finger protein 362	0	0.0269364	0	0	0	0.0171136	8.16758	1.76748	0.0253671	14.2825	18.4192	22.431	32.3935	55.3502	45.2654	54.935	0.757439	0.0986216	0.843264	0.0890977	76.8179	91.1764	49.3609	3.00541	2.00947	2.76383	0.947541	1.1834	0.852796	0.943824	0.930862	0.890637	0.509932	2.43314	0.513238	0.419841	0.345866	1.05663	0.42252	0	0	0	0.0104037	0	0	0	0.063799
gene12805	LOC109416282	zinc finger protein with KRAB and SCAN domains 3	0.604752	0	0	0	0	0	2.23294	0.784557	0.0286908	10.1337	12.0377	10.8536	12.7695	22.2808	19.6108	23.7192	0.23364	0.0418287	0.3546	0.00629822	27.711	39.0869	20.9159	1.124	0.708709	1.5942	0.600567	0.388243	0.504176	0.67451	0.177443	0.474382	0.277692	0.943837	0.238222	0.170696	0.19375	0.526919	0.194525	0	0.0240288	0	0	0	0	0.011725	0.0432949
gene12806	LOC109416280	zinc finger and BTB domain-containing protein 49	0.158349	0	0	0.00755067	0	0.0151465	2.25678	0.880326	0.033677	7.70292	9.87564	14.3923	16.2046	25.8423	25.0619	23.3559	0.714459	0.15275	0.940959	0.0985708	42.6282	56.3634	84.9658	4.75128	1.95061	3.64936	1.62661	1.62996	1.15229	1.05877	0.496727	0.9593	0.543254	2.23131	0.489187	0.562264	0.447102	0.877029	0.362956	0.010467	0	0	0	0	0.00959311	0	0.0338795
gene12808	LOC109416310	geranylgeranyl pyrophosphate synthase	0.138012	0.0181811	0	0	0.0110203	0	10.2963	0.259344	0.0684876	0.505675	0.0851114	0.153139	9.02783	38.1328	0.230594	0.473251	0.0464768	0.0998492	0.0242264	0.0902068	0.445754	0.320664	0.357967	0.118493	0.573739	0.279118	0.213186	0.243483	0.255826	0.322024	0.0612768	0.0419406	0.0764858	0.237439	0.0836732	0.0149146	0	0.116704	0	0.0319296	0	0	0.0280886	0	0	0	0
gene1322	LOC109412599	general odorant-binding protein 45	0.0265175	0	0	0	0	0	0.243812	4.9896	0.0317089	0.00718697	0.0412069	0	186.036	8.73405	0.0747334	0.0298785	0	0	0	0	0	0.0205374	0	0	0.0224175	0.0302394	0.023224	0.0118663	0.0218463	0.0259292	0	0	0.0236079	0	0.0123374	0	0.0127157	0	0.0155338	0	0	0	0.00858307	0	0.0270974	0	0.0105268
gene13251	LOC109416775	uncharacterized LOC109416775	0	0	0	0	0	0	0	1.13059	0.0539577	0.0370599	0.0670546	0	35.6127	62.7381	0.0181672	0	0.097644	0	0	0	0	0.0210528	0	0	0	0.0439804	0.0197597	0.0706731	0	0	0	0.0110142	0.0100432	0	0	0.0235009	0	0	0	0	0	0	0	0	0	0	0
gene13277	LOC109416809	uncharacterized LOC109416809	0.987243	0	0.0183467	0	0	0	2.74542	1.07591	0.0639158	17.9035	34.9868	24.0429	23.1579	27.7122	19.3715	13.3433	1.66731	0.383296	1.3304	0.467508	19.2132	48.9887	31.1096	2.15541	2.82664	1.68899	1.58789	1.83793	1.45	1.57215	0.597163	1.55676	0.690007	3.56167	1.40508	0.682032	0.657692	1.45218	0.610577	0.238385	0.0267651	0.0501158	0.0262136	0.0445025	0.0546205	0	0.0643001
gene13395	LOC109416903	general odorant-binding protein 45	0.0659887	0	0	0.123347	0	0	49.5769	0.423262	0.602537	0.0179931	0.130224	0.0360475	23.3389	455.143	0.0176409	0.0329134	0	0	0.0446595	0.0690101	0	0.0817717	0.0365137	0.0394129	0.0446286	0.0960891	0.0383745	0.215681	0	0	0	0.0427806	0	0.0605486	0	0	0	0	0	0	0	0	0	0	0	0.256944	0.105419
gene13423	LOC109416934	tubulin alpha-8 chain	0.317427	0.0334533	0.0137017	0	0.0101387	0	6.93389	2.79954	0.0787608	24.2131	25.6832	40.4456	49.0611	64.986	52.8351	51.95	0.185287	0.0153102	0.214827	0.138317	52.311	19.4339	5.82914	0.793903	0.76479	0.873082	0.288428	0.542327	0.222284	0.592525	0.324739	0.270097	0.222829	0.740281	0.085805	0.425365	0.126336	0.345962	0.200637	0.0146876	0.0527704	0.0123511	0.051683	0	0.0403839	0.0514993	0.221856
gene13424	LOC109416935	tubulin alpha-8 chain	0.264997	0.201701	0.101676	0.108109	0.0376182	0.0690025	10.405	7.87898	0.365288	100.507	130.635	140.839	178.335	175.791	130.399	140.948	4.98424	0.667474	6.81257	1.41131	158.771	241.005	186.395	13.4863	10.9896	16.9237	8.15468	10.5751	6.84059	6.85829	4.07255	7.30143	4.74306	18.0787	3.97959	4.70931	4.4297	5.98663	2.44804	0.286105	0.232509	0.091654	0.0958811	0.142429	0.174812	0.0716553	0.22049
gene1365	LOC109413035	leucine-rich repeat receptor-like serine/threonine-protein kinase BAM2%2C transcript variant X2	0.962034	0.0724198	134.619	125.907	241.651	197.708	103.742	194.95	74.8843	0.445003	2.51843	0.0703832	0.102025	0.0656836	0.0918511	0.0535532	0.046282	0	0.0871983	0	0	0	0	0.166734	0.101661	0.0972821	0.0124878	0.0510448	0	0	0.337438	0.0278432	0.279273	0.144494	0.0132679	0	0	0.051651	0.0334108	0.397448	0.0142797	0.0133689	0.15384	0.0118715	0.0291411	0.0418072	2.50429
gene13808	LOC109417344	general odorant-binding protein 99b	0.0372736	0	0	0	0	0	13.6051	0.597697	0.147975	0	0	0	21.1623	156.317	0.348756	0.302105	0	0	0.0630646	0	0	0	0.0515618	0	0	0.0301532	0.0270947	0.13844	0	0.0302508	0	0.0906171	0.0275426	0.0285006	0	0	0	0.0280168	0.0362456	0	0	0	0.0303442	0	0.126455	0	0
gene13809	LOC109417343	general odorant-binding protein 99b	0.447283	0	0	0	0	0	22.0995	0.369166	0.0522264	0.0538062	0.370875	0.233557	5.62521	175.759	0.105506	0.262462	0	0	0.0445162	0.0917183	0	0.0203773	0.10919	0.0196432	0	0.106423	0	0.0195444	0	0	0	0.106608	0.116651	0.0603543	0	0.0454936	0	0.0791062	0.0255851	0	0	0	0	0.0363635	0	0	0
gene13833	LOC109417381	regucalcin	0.67858	0.0771408	0.0950231	0.0734797	0.0235549	0.0121604	33.1051	0.303362	0.382351	2.05099	1.22183	1.02705	1.54695	202.571	0.47816	0.617622	0	0.0971531	0.162952	0.239811	0.174407	1.12953	0.691654	0.136824	0.0930511	0.170518	0.186826	0.279221	0.166399	0.0299259	0.059906	0.148515	0.0134201	0.252489	0.0850097	0.110861	0.233496	0	0.214068	0	0.106588	0	0	0.0380312	0.0466779	0.208489	0.256616
gene14108	LOC109417736	trypsin-1-like	0.328587	0.0506921	47.3572	470.677	135.147	268.202	143.884	92.3323	289.275	0.118513	0.0918997	0	0	0.0316537	0.235485	0.036131	0.0130106	0	0.0245128	0	0	0	0.220458	0.663267	0.0734874	0	0.021063	0.0430484	0	0.0235165	0.268925	0	0.471047	0.191871	0	0	0	0	0	0.178587	0	0	0	0.0200235	0.0285081	0	0.303778
gene14206	LOC109417803	uncharacterized LOC109417803	0.918217	0.0806416	0	0	0	0.0256172	0.754856	1.03528	0.151887	9.67578	33.6791	28.8938	38.3766	17.2821	25.4419	26.0716	2.0271	0.147626	2.42745	0.466793	52.3356	64.8033	42.3929	4.11316	4.07529	3.46645	0.917765	1.64836	2.08029	2.9498	0.876745	1.48821	0.621957	3.5105	1.32968	1.85229	1.4009	2.35811	0.595262	0.177028	0	0.0595466	0	0	0.064899	0	0.3056
gene14225	LOC109417620	uncharacterized LOC109417620	0	0	0	0.107338	0.102712	0	5.55164	2.5783	0.159581	36.4986	76.9463	67.9611	74.3865	52.5184	60.1775	86.2115	6.35324	3.56738	11.9699	2.94263	135.634	334.607	235.769	17.7662	16.0395	22.5026	7.94779	14.6909	11.5244	10.048	3.81621	7.81795	4.99007	20.1628	5.71232	6.81141	6.78334	10.6354	2.65801	1.04157	0.13365	0	0	0	0	0	0.16054
gene14226	LOC109417621	uncharacterized LOC109417621	0.135168	0.0854713	0	0.0180469	0.0172692	0	10.2675	3.08865	0.160984	10.2645	19.4152	27.8	42.6578	93.5421	85.8383	115.285	6.7247	1.25174	6.74653	1.62561	179.805	232.088	234.177	26.1368	9.91854	14.5213	6.46522	9.01654	8.5968	10.5971	2.19038	9.09158	2.85656	11.431	5.38672	4.39388	5.59489	7.70122	3.10199	0.400278	0.0898836	0	0	0	0.0229286	0	0.0539838
gene14239	LOC109417822	collagenase-like	0.0528476	0.0278478	0	512.491	444.898	3.66238	0.68892	0.794469	0.891663	0	0.0558703	0	0	0	0.282558	0.0658974	0	0	0	0	0	0	0	0.848287	0	0	0	0	0	0	0.886666	0	0	0	0	0	0	0.0198615	0	0.366796	0	0	0	0.657355	3.42894	0.4287	0.158298
gene14244	LOC109417827	collagenase-like	0.432271	0.0296979	0.989145	918.727	1514.97	144.44	23.9934	1.88259	2.13953	0.0576275	0.112412	0.0384837	0.0334706	0	0.263664	0.175689	0	0.0271831	0	0	0	0	0.0389814	1.43397	0	0.0150455	0	0	0	0	2.137	0	0.215306	0.0538672	0	0	0.0224308	0	0	1.01703	0	0	0	0.246528	0.625233	1.28011	0.313996
gene14245	LOC109417828	collagenase-like	0.224151	0	0.209474	396.891	486.367	61.9177	14.3732	0.964298	1.54337	0	0.0130334	0	0.01664	0	0.26853	0	0	0.0270283	0	0	0	0	0	0.282399	0	0.0149599	0	0	0	0	0.642081	0	0.0757767	0.0107121	0	0.0484471	0.0223031	0	0	0.302334	0	0	0	0.0515032	0.22576	0.560495	0.0884031
gene14265	LOC109417578	O-acyltransferase like protein	0.281085	0.0710958	0.252367	0.0450349	0.00718235	0.0376414	1.86182	1.39727	0.022318	16.8922	15.7615	15.3394	37.7801	23.3244	19.6425	18.7234	0.636103	9.36001	9.87302	11.3565	18.422	5.08539	1.75753	0.512043	0.41822	0.582117	0.171633	0.417597	0.351988	0.428875	0.598125	0.537573	0.124621	0.47284	0.130254	1.97324	3.31142	0.354947	4.63573	2.69486	3.03737	1.95992	3.60635	0.466178	0.867786	0.14593	0.213295
gene14401	LOC109418061	probable chitinase 3	0.02524	0	0	0	0	0	0.480203	5.21094	0.0835015	0	0.0355781	0.0172347	158.664	182.548	0.0899664	0.0419634	0.0151108	0.00811588	0.0142348	0	0	0.00651601	0.0116384	0.025125	0	0.0544491	0.0366946	0.0937451	0	0.0136563	0	0	0.0124337	0.0128662	0	0.00727369	0.0736673	0	0.0327252	0	0	0	0	0	0	0	0
gene14486	LOC109418116	leucine-rich repeat receptor-like serine/threonine-protein kinase BAM2%2C transcript variant X2	0.824025	0.0723692	105.61	107.422	206.839	165.362	91.3551	158.03	62.7008	0.327668	2.05689	0.0468894	0.142735	0.0468841	0.091787	0.0535158	0.0154166	0	0.0580916	0	0	0	0	0.115351	0.0725643	0.0694387	0.0124791	0.0510092	0	0	0.252902	0.0278238	0.304449	0.118139	0.0132587	0	0	0	0.0333874	0.238302	0.0428092	0.0133595	0.125781	0.0118632	0.0291208	0.0417781	1.88548
gene14642	LOC109418324	follicle cell protein 3C-1-like	0.946919	0.101831	0.133465	0	0.0617242	0.168212	0.136172	6.25575	0.115079	1.08021	7.15056	1.37235	193.326	1.43553	0.658687	0.614469	0.0867712	0.0932083	0.065393	0.0842071	0.425898	0.224503	0.0400991	0.0288553	0.392087	0.125066	0.0561902	0.0717755	0.0796036	0.141154	0.142344	0.281888	0.0713987	0.0591058	0.0447754	0.0501216	0.0769132	0.0871535	0.0375838	0	0.128506	0.090232	0.110126	0.0267085	0.180295	0.0156763	0.385901
gene1466	LOC109414409	uncharacterized LOC109414409	0.0245515	0.0258745	0	0	0	0.098634	0.0173001	0.639751	0	0	0.0692152	0.0670584	41.577	22.69	0.0328171	0.045921	0.0440957	0	0	0	0	0	0.0339628	0	0	0	0.0356937	0	0	0	0	0	0	0	0	0	0	0	0	0	0	0	0	0.033932	0	0	0
gene1467	LOC109414419	general odorant-binding protein 45	0.0490051	0.051646	0.013961	0	0	0	0.166786	2.91391	0	0.323032	0.293579	0.13385	103.737	27.4136	0.0655034	0.336083	0	0	0	0	0.812991	0.980347	0.875512	0.0365865	0.124284	0.0792874	0	0.109207	0	0	0	0	0	0	0	0.0423671	0	0	0	0.0303846	0	0	0.0131653	0	0	0	0
gene1469	LOC109414052	cell wall protein DAN4	0.0975108	0.0587232	0.11617	0.0185988	0	0.0373089	0.222426	3.6251	0.0138255	0.0507076	0.0524276	0	115.891	82.2339	0	0.0491568	0	0	0	0	0.00698697	0.0286979	0.044899	0	0	0	0.020252	0.0206954	0	0.0565275	0	0.0225773	0.0205868	0	0	0.0722591	0	0	0.0270919	0.0301653	0.023158	0	0.0605578	0.182899	0.0708891	0.192102	0.111269
gene1470	LOC109414064	uncharacterized LOC109414064	0.0470374	0.0495722	0	0.031401	0	0	20.5166	15.3446	1.774	0.0320643	0.0663037	0.0963564	500.243	1379.45	0.392958	0.161294	0	0	0	0	0	0.218579	0.162671	0	0	0.133182	0.102577	0.576524	0	0	0	0.0762362	0	0	0	0	0	0	0	0	0.0195493	0	0.0191464	0	0	0.0763135	0
gene1473	LOC109414105	lamin Dm0-like	0.0463506	0.0854847	0.130047	0.0850918	0.0666203	0.0620702	12.1743	9.19773	0.299016	89.817	104.708	135.841	182.543	185.525	163.722	170.433	6.11873	0.648322	6.6757	1.08054	184.301	318.597	316.4	19.9352	14.4948	21.0916	11.1355	12.9029	10.6538	7.61435	4.44784	9.48428	4.58092	14.6076	3.97355	5.13925	4.48276	8.43987	2.67053	0.0750639	0.0481595	0.0180351	0.00943342	0.016015	0.0687966	0.0375996	0.323954
gene14748	LOC109418432	uncharacterized LOC109418432	0.144285	0.015206	0.0249122	0.0168562	0.018434	0.0265675	0.325344	0.780863	0.00358004	59.3206	39.369	52.2318	22.339	7.1815	13.7317	12.5782	0.0518286	0	0.0579788	0.0125743	5.92936	3.31888	2.00093	0.468586	0.128075	0.306396	0.144214	0.214358	0.106982	0.10539	0.0679	0.0964634	0.0959549	0.159971	0.0501458	0.0311851	0.051683	0.0976068	0.0561222	0	0.0389781	0.00561414	0.0176192	0.0124633	0.0275345	0.0117044	0.176476
gene14803	LOC109418495	uncharacterized LOC109418495	0.744105	0.0475276	0	0	0	0	5.24332	2.98301	0.0447586	28.5437	45.8649	28.0379	40.7899	58.9208	47.4252	56.8097	0.607478	0.130509	0.438736	0.294764	70.1721	28.3609	7.33018	0.937006	0.972175	1.36809	0.196691	0.586244	0.546152	0.96991	0.405998	0.785736	0.0999713	1.56311	0.435373	0.428874	0.341027	0.440667	0.241195	0.0417338	0.0187429	0	0	0	0.114748	0	0.29268
gene14821	LOC109418513	uncharacterized LOC109418513	0.976875	0.175771	0.195407	0.159058	0.0684914	0.207394	5.59076	4.2027	0.248297	40.1009	44.7188	65.0694	91.8126	89.2828	96.8646	101.674	0.395837	0.287298	1.03805	0.269936	111.367	29.5711	12.3846	3.30862	8.54034	6.19682	1.24701	1.27432	1.13849	1.07321	0.682502	0.77233	0.519375	1.44836	0.386434	0.628264	0.39828	0.564134	0.220107	0.0771722	2.79249	1.99323	1.71661	0.255205	0.202082	0.193278	0.547158
gene14942	LOC109418646	sodium/potassium/calcium exchanger 3-like%2C transcript variant X3	0.284456	0.0413497	0.0423398	0.0392888	0	0.0459741	1.67956	0.914241	0.0876167	26.465	20.795	18.8477	16.9109	20.4073	25.8027	28.0762	1.29486	8.73348	3.44366	7.09509	26.5299	5.9711	3.80607	0.58585	0.464365	0.666545	0.39216	0.451751	0.404048	0.445801	0.505754	0.548472	0.391395	0.540012	0.545445	0.890418	1.21022	0.523471	1.66921	5.01066	4.30495	10.0683	11.7703	0.047448	0.0665551	0.0159139	0.0979371
gene15181	LOC109418889	uncharacterized LOC109418889	0	0.0147476	44.0337	21.1216	22.5713	13.6235	51.8464	88.9572	48.6789	0.104929	0.0493129	0	0	0	0	0	0.0125665	0	0	0	0	0	0	0.0208947	0	0	0	0	0	0	0.0572634	0.01134	0.0413609	0.0534995	0	0	0	0	0	0.0258997	0	0	0	0	0.0237372	0	0.181635
gene15182	LOC109418906	uncharacterized LOC109418906	0.14844	0.0568871	26.1073	8.43207	9.9738	7.73446	23.8103	40.0729	40.5279	0.0183978	0	0	0	0	0.00901884	0	0	0	0	0	0	0	0	0	0	0	0	0	0	0	0.0220887	0	0.00997154	0.0206368	0	0	0	0	0	0.0374643	0	0	0	0	0	0	0.350317
gene15314	LOC109419077	mucin-2	0.0250515	0.00924053	0.0432539	0.025671	0.0200038	0.02818	0.811661	3.30257	0.275859	0.111513	0.0419335	0.0245472	114.693	287.88	0.116529	0.100897	0.0573671	0.0221117	0.0144111	0.0272901	0	0.00320134	0.0432315	0.00467576	0.00529453	0.0695121	0.0929636	0.143289	0.0247663	0.0101657	0.0171199	0.0713587	0.0076822	0	0.0322143	0.00541453	0.019941	0.0289041	0.0121803	0.00579578	0.0420631	0	0.0152957	0.0363542	0.00531187	0.0101609	0.00625321
gene15321	LOC109419034	mucin-2-like	0.0214571	0	0.0105586	0	0.00685346	0	3.11692	0.477187	0.0781562	0.0292536	0.00756145	0.00424898	15.3539	115.309	0.0324095	0.0258191	0	0.0649933	0	0.0186996	0	0.0166182	0	0	0	0.00867908	0	0.031878	0	0	0	0.0161712	0	0	0.00944598	0	0	0	0	0.00655274	0	0	0	0	0	0	0.021424
gene15594	LOC109419361	uncharacterized LOC109419361	0.254489	0	0	0.141575	0	0	0.687412	3.14564	0.126289	0.0289131	0.179363	0.202736	116.451	147.181	0.538596	0.555328	0	0	0	0	0	0.197098	0.117347	0	0.10757	0.102937	0.0616638	0.0945209	0.0698865	0.0688466	0	0.034372	0	0	0.0327581	0	0	0	0.041245	0.0392514	0.0705121	0	0.0345296	0.0293102	0	0	0
gene15595	LOC109419362	nucleoplasmin-like protein ANO39	0.581906	0.126882	0.0173227	0.0937676	0.0256362	0.0806128	0.212089	5.63084	0.497876	0.205175	0.650544	0.219225	187.945	310.446	0.496191	0.300247	1.40552	0.0967815	0.152775	0.0174871	0.0914948	0.202028	0.277576	0.3895	0.101779	0.243489	0.218791	0.432257	0.214904	0.325702	0.591205	0.617911	0.192753	0.168772	0.294449	0.121434	0.0319447	0.527885	0.156099	0.0557075	0.150111	0.218613	0.0816768	0.0277324	0.238263	0.146496	0.0801391
gene15739	LOC109419528	zinc carboxypeptidase A 1-like	0.124335	0.14339	1.87075	122.957	23.7994	0.344898	1.05961	6.55699	19.3976	4.23175	0.10015	0	0.0105487	0	0.0712261	0.0553705	0	0	0.285498	0.030959	0	0.0137565	0.0491419	0.172392	0	0	0	0	0	0	0.0194797	0.0287881	0	0	0	0.184274	0.254497	0	0.466352	0.0657496	0.472457	0.0920582	0	1.90669	7.9745	1.08065	3.18055
gene15851	LOC109622828	general odorant-binding protein 69-like	0	0	0	0	0	0	0.456979	10.7676	0.0643651	0	0.0914152	0.0295222	354.89	234.439	0.0866855	0.0269554	0	0	0	0	0	0	0.014952	0	0	0.0174878	0.015714	0.0963482	0	0	0	0.0350365	0.0479212	0	0.0834784	0	0	0	0.0420424	0	0	0	0	0	0	0	0
gene15852	LOC109622827	uncharacterized LOC109622827	0	0	0	0	0	0.0178654	0.0846055	3.32923	0.0926849	0	0.047013	0	97.8537	84.7803	0.0267484	0.0415879	0.0119805	0.0128692	0	0	0.0101385	0	0.0184549	0	0	0	0	0.03964	0	0	0	0	0	0	0	0	0	0	0	0	0	0	0.0217214	0	0	0.0216442	0
gene15853	LOC109622795	uncharacterized LOC109622795	0.097864	0	0	0	0	0	1.15507	5.81128	0.509928	0.0250168	0.0862178	0.0250594	189.42	413.157	0.05723	0.0686418	0	0	0.0310462	0.0533047	0	0.0568458	0.0253835	0	0.0103416	0.069273	0.0444618	0.263524	0	0	0	0.0297401	0	0	0	0.0211519	0	0	0	0.0226413	0	0.0190395	0	0	0	0	0
gene1595	LOC109415543	putative vitellogenin receptor	0.398928	0.0169869	0.0347873	0.0672511	0.0154447	0.0188867	7.22067	4.511	0.0399932	246.161	140.91	149.581	115.629	56.7428	105.98	85.7785	0.133891	0.0855165	0.201125	0.0772582	76.6263	17.1959	6.2766	2.00662	0.429224	0.788874	0.377862	0.407088	0.185906	0.18968	0.290217	0.391858	0.178655	0.403631	0.0280093	0.132382	0.141132	0.28774	0.144982	0.0298323	0.117231	0.0344941	0.0065609	0.0417689	0.0615185	0.00980638	0.358079
gene15969	LOC109419712	vitellogenic carboxypeptidase-like	0.456472	0.687244	0.534812	2643.52	6740.87	1487.22	64.3074	62.8711	15.1123	0.0333392	34.3091	2.59375	1.43291	0.062332	1.08955	0.325251	0.0732007	0	0.317204	0	0	0	0	3.37143	0.0275639	0.092318	0.0118506	0	0.0134308	0.0396929	10.7762	0.171746	2.01176	0.112189	0.0881364	0.0140943	0.0129769	0.0612693	0	5.68768	0.013551	0	0	0.123923	0.580736	1.15054	0.358103
gene16053	LOC109419795	uncharacterized LOC109419795	0.215417	0	0	0	0	0	0	0	0	27.5186	0	0	0	0	0.0575879	0	0	0	0	0	0	0	0.0297993	0	0	0	0	0	0	0	0	0	0	0	0	0	0	0	0	0	0.0716235	0	0	0	0	0.279594	3.26928
gene16090	LOC109419876	uncharacterized LOC109419876%2C transcript variant X2	0.0344227	0.0226395	0	0.00570173	0.104656	0.0722648	0.826705	0.488431	0.00847683	16.3548	30.5814	16.2619	13.1214	7.7116	12.1832	16.0689	0.108542	0.137317	0.3466	0.15789	44.0616	66.6993	23.0511	1.1014	0.42294	0.753751	0.191336	0.233977	0.238173	0.241561	0.296553	0.16087	0.0893128	0.623386	0.133328	0.0933074	0.0550071	0.213994	0.0294465	0.00790396	0.060883	0.0972821	0.0280233	0.038811	0.0182198	0.0140668	0.0646045
gene16260	LOC109420036	trypsin-1-like	0.210944	0.0502776	196.241	1018.01	252.951	535.521	304.499	326.174	640.102	0.169655	0.145027	0	0.0170677	0	0.316919	0.0297435	0.0903293	0	0.0729369	0	0	0	0.0596333	1.34444	0.113217	0	0.0208908	0	0	0.116621	0.243205	0	0.693572	0.73264	0	0	0	0	0.0279464	0.230318	0	0.0670943	0	0	0.182813	0.0153866	0.712775
gene16261	LOC109420035	trypsin-1	0.287573	0.606141	676.287	3056.47	966.045	2003.2	1293.46	1019.14	1913.61	0.742425	0.629416	0	0.0465779	0	1.27268	0.19005	0.129124	0	0.0663486	0	0	0	0.0361645	4.08589	0.0808892	0	0.0380075	0.0388396	0	0.106087	1.44082	0	2.38267	1.53242	0	0.113009	0	0	0.050844	1.51595	0.108653	0.101723	0.0851314	0.0903291	0.883382	0.162447	3.44138
gene16319	LOC109622847	rRNA 2'-O-methyltransferase fibrillarin-like	0.0650809	0	0	0	0	0	0.626435	1.67367	0	2.34242	18.3585	11.1214	34.0373	35.4715	42.3996	37.4652	1.71476	0.586365	4.08188	1.02091	57.0557	76.5822	43.8952	12.5776	7.82691	5.66814	4.87275	4.48633	5.7981	5.92627	0.657279	0.82591	0.753094	19.4146	1.08871	0.618918	0.966672	1.89802	0.611343	0.361362	0.108193	0	0	0	0	0	0.129961
gene1632	LOC109416002	BTB/POZ domain-containing protein 6	0.895524	0.0185056	0	0.0703328	0.011217	0.0587861	7.48573	1.72462	0.0522823	31.2171	52.0895	55.4182	53.1213	68.9689	53.2672	71.0172	1.48226	0.321831	2.30247	0.183633	80.6799	71.1659	38.9981	4.82429	5.03223	5.82403	2.01673	3.24785	2.7341	2.39415	0.862262	2.23406	1.40131	7.57251	1.19341	1.86724	1.21602	1.88738	0.512251	0.0649987	0.043787	0.0409941	0	0.0364024	0.0297859	0.0427323	0.140258
gene16371		glycoprotein-N-acetylgalactosamine 3-beta-galactosyltransferase 1-like	0.283989	0	0.367752	0.023698	0.0226767	0.0713068	0.100056	4.376	0.0704642	0.362978	0.325252	0.0484795	106.886	23.442	0	0.177058	0.0637575	0.0342436	0.0600616	0	0.269775	0.164959	0.0982129	0.0530055	0.03001	0.114869	0.103218	0.052739	0.116982	0.144051	0.0871594	0.230139	0.472159	0	0.411248	0.153451	0.113028	0.0533653	0.310677	0	0.0295072	0.0276252	0	0	0.0602165	0.0287965	0
gene16392	LOC109420124	histone H1	0.225424	0.435892	0.034409	0.00959628	0.187828	0.162312	0.986675	0.402731	0.190658	0.459661	4.951	4.3394	10.7853	15.5851	15.1143	21.1382	0.843191	0.194133	1.5234	0.27105	44.9023	24.7125	31.9772	10.9715	3.03917	4.34231	2.07038	2.56176	2.5677	1.98701	0.544923	1.32481	0.538826	2.37416	0.562168	0.901006	0.755718	1.12518	0.307525	0.106422	0.286225	0.0757634	0.0547888	0.0591499	0.0326968	0.0848063	0.176799
gene16397	LOC109420125	histone H1	0.221086	0.439737	0.0060679	0.0946972	0.435938	0.417145	1.45026	0.736449	0.211815	0.657717	6.41206	5.01588	16.4527	21.9519	21.4989	25.2688	0.668497	0.277373	1.7968	0.395371	56.1135	35.6698	38.8923	11.318	3.7845	5.32885	1.95779	3.21908	2.53838	2.2797	1.0229	1.34942	0.60578	3.17725	0.711624	1.27389	0.902811	1.35057	0.467258	0.122403	0.529006	0.113871	0.0275698	0.0825711	0.106222	0.0622005	0.363016
gene16398	LOC109420138	histone H4	0.0651522	0.118385	0	0.021747	0.0531008	0.17224	1.98756	1.15057	0.027872	1.24279	22.357	10.5752	20.9989	24.7535	23.9811	30.5387	0.977494	0.656661	4.04253	0.499268	95.0624	64.944	60.3619	35.4631	14.7782	13.6191	6.48262	6.97251	6.15878	4.69873	2.33515	2.11829	0.869064	8.75845	0.814644	2.36379	2.2658	2.2983	1.112	0.20167	0.485536	0.287601	0.345674	0.0830591	0.319168	0.130306	0.14917
gene16413	LOC109420122	histone H1	0.233982	0.337007	0.00617211	0.0386162	0.0689217	0.0474355	0.950777	0.836382	0.221258	0.752749	5.79062	5.31149	18.4807	22.4148	19.2926	29.9272	0.536394	0.0514116	1.39988	0.202213	55.7687	34.958	31.7812	6.65897	2.82915	4.02965	1.57565	2.70997	1.78629	1.08452	0.646303	0.88855	0.514847	2.52065	0.399069	0.609672	0.758968	0.845166	0.249649	0.0992433	0.139925	0.0187143	0	0.0121268	0.0882008	0.0659049	0.147311
gene16414	LOC109420140	histone H4	0	0	0.0206693	0.0231756	0.081825	0.0633225	1.2594	0.928612	0	1.20937	14.8511	9.16663	18.8941	18.2344	19.9544	29.5677	0.951406	1.02545	4.10555	0.556061	97.1844	64.507	52.2128	16.7809	7.85223	10.0096	3.61479	4.90242	3.59975	3.79588	1.68321	1.20585	0.878388	5.94886	0.610209	1.39098	1.11013	1.74023	0.479606	0.136263	0.3224	0.221719	0.0487279	0.107542	0.225403	0.0417571	0.0203194
gene16415	LOC109420132	histone H2A	0.0349966	0	0.0177721	0.0137429	0.0131506	0.006892	0.480875	0.372404	0	1.1851	9.71966	5.61086	12.3555	13.785	14.7202	23.9774	0.444612	0.139009	1.12329	0.659321	39.6202	31.6229	28.2669	3.28136	1.47493	1.70367	0.565656	1.17673	0.999786	0.872133	0.411943	0.62977	0.467763	2.25961	0.207486	0.478758	0.503072	0.59419	0.247229	0.0476272	0.0898366	0.0240304	0.0167591	0.024184	0.0122222	0.0100197	0.0554971
gene16416	LOC109420103	histone H2B-like	0.0130912	0.114972	0.0706352	0.00873936	0.0954746	0	1.07006	0.513874	0.0357305	5.60945	28.618	8.61658	15.0356	14.133	18.8401	23.5002	1.75658	1.15234	3.0151	0.577098	51.3573	49.3616	62.0944	21.2162	11.1925	7.53772	4.10227	6.69697	6.8926	7.37174	2.61427	2.15978	1.11487	7.22888	1.44246	2.14946	1.4806	2.93561	0.844435	0.289747	2.3178	5.04202	2.71765	0.0218624	0.538512	0.12124	0.0697121
gene16419	LOC109420105	histone H2A	0.0264522	0.0111511	0.0639413	0.0727544	0.0561008	0.00708468	1.61716	0.727456	0.105014	2.3701	19.5518	11.0745	21.6522	26.8792	23.5808	29.817	0.848521	0.430727	1.20929	0.545891	63.1544	50.583	55.9532	11.7877	2.8418	3.45467	1.43291	1.68671	1.83232	1.39115	0.985475	0.893465	0.207191	3.67956	0.719128	1.01813	0.901198	1.09276	0.135816	0.0293752	0.671063	0.11363	0.107673	0.109677	0.174997	0.0961321	0.557809
gene16496	LOC109420189	nuclear pore complex protein NUP98B	0.286172	0	0	0	0	0.00684332	0.0792198	24.358	0.0101437	0.111472	0.30254	0.237281	910.341	1.60965	0.10246	0.070093	0.0458911	0.0197182	0.146985	0	0.0155342	0.134565	0.0353456	0.0152608	0.00864019	0.0496081	0.0817232	0.0911045	0	0	0	0.0745417	0.0226566	0	0.00789351	0.00883601	0.0406774	0.0076822	0.00993856	0	0.0254863	0.0238607	0	0	0.017337	0	0.0204093
gene16497	LOC109420191	uncharacterized LOC109420191	0.369933	0	0.0638727	0	0	0	0.28674	19.205	0	0	0.443237	0.429426	662.697	4.86965	0.716991	0.784179	0.066442	0	0	0	0.0843403	0	0	0.0552373	0	0.179559	0.107564	0	0	0.120093	0	0.119914	0	0	0.0285709	0	0.0588935	0	0	0	0	0	0.030116	0	0	0	0
gene16498	LOC109420192	uncharacterized LOC109420192	0.070827	0	0	0.0472823	0	0.0632318	3.80965	11.0735	0.0234317	0.0643747	0.166395	0.354663	333.224	38.5056	26.7921	30.3073	0.14841	0	0	0	0.0358837	0.0182848	0.0326591	0.158635	0.0199587	0.0954949	0.0343234	0.1403	0	0.0574823	0	0.0191322	0.174454	0.0541567	0	0.040822	0.13155	0.106474	0	0.0436964	0	0.0183726	0.0576598	0.0489442	0.20024	0	0.0235726
gene16499	LOC109420193	uncharacterized LOC109420193%2C transcript variant X1	0	0	0	0.0175269	0	0	4.27356	18.7083	0.0260575	0.12528	0.166538	0.143421	588.467	108.17	0.473764	0.245533	0.141464	0	0.111053	0	0	0.0203338	28.2561	0.215614	0.332928	0.27611	0.114509	0.156022	0	0.0639237	0.128925	0.170209	0.0388007	0.0401503	0.121663	0	0.0417974	0.059203	0.0510611	0.048593	0	0	0	0	0.133607	0	0.104856
gene16501	LOC109420165	formin-like protein 13	0.0508276	0	0	0	0	0	0.859573	4.58461	0	0	0.143293	0.0347069	121.236	228.568	0.0339697	0	0	0	0	0	0	0.0393653	0.0351557	0	0	0	0	0.151025	0	0	0	0.0411896	0	0	0	0	0	0	0.0494259	0	0	0	0	0	0	0	0
gene16502	LOC109420197	pistil-specific extensin-like protein	0.0529045	0	0	0	0	0	0.37279	1.06043	0.105014	0	0	0	42.7929	113.43	0	0	0	0	0	0	0	0	0	0	0	0.0855963	0	0	0	0	0	0.0428726	0	0	0	0	0	0	0	0	0	0	0	0	0	0	0
gene16656	LOC109420421	formin-A	0	0	0	0.0115409	0	0.0463018	10.3545	1.16085	0.291686	0.106062	0.30461	0.247899	46.4273	254.311	0.450606	0.161676	0.0155249	0	0	0	0.0262761	0.0669459	0.0478296	0	0	0.0559413	0.163368	0.102735	0	0.0420917	0	0.126087	0.0127745	0	0.0133519	0	0	0	0	0	0	0.0134534	0	0.0238931	0	0.0841433	0
gene16667	LOC109420393	uncharacterized LOC109420393	0	0	0	0	0	0.0313153	14.896	2.20301	0.23209	0	0	0	0.472184	192.512	65.9842	61.0006	0.377999	0.0902313	0.118696	0	0	0	0	0	0.0395379	0.227009	0.101992	0.486382	0.115592	0.113872	0.306218	0.341106	0.0691183	0.107284	0.252847	0.161736	0	0.175771	0	0.086562	0	0	0	0	0.0396673	0	0
gene16875	LOC109420681	uncharacterized LOC109420681	0	0	0	0.0347571	0	0	2.27461	3.00035	0.465064	0	0.0733901	0.0355516	101.435	496.941	0.0521948	0.0162303	0	0	0	0	0	0.0403234	0.108034	0	0	0.0210594	0.0756932	0.251389	0	0	0	0	0	0	0	0	0	0	0	0	0.0216386	0	0.0211928	0	0	0	0
gene16879	LOC109420684	lamin Dm0	0.115225	0.0607173	0.129316	0.0692293	0.0809671	0.138873	16.5877	10.4856	0.365952	119.018	139.008	185.349	228.95	233.827	220.432	226.106	6.2499	0.622448	9.03611	0.97405	230.758	395.207	396.438	24.5659	18.0241	24.5245	13.8621	16.8532	12.4165	10.0093	6.1203	11.4666	5.74718	19.5006	4.60976	6.88355	5.5582	10.4537	3.46226	0.2026	0.0287333	0	0.0281412	0	0.0293185	0.0747765	0.483199
gene16899	LOC109420706	uncharacterized LOC109420706	0.0620675	0.0934862	0	0.00586843	0.1928	0.0832958	1.14182	0.609501	0.00872467	25.8729	45.7912	25.2137	18.1668	11.4218	17.8982	23.8769	0.231326	0.179876	0.751101	0.185721	69.3053	98.8601	33.137	1.3822	0.705542	1.15291	0.24534	0.438696	0.321947	0.194575	0.337925	0.338271	0.239554	0.875851	0.198946	0.153611	0.205045	0.350399	0.069163	0.0327867	0.0737342	0.131221	0.0505287	0.0307416	0.0300492	0.0360872	0.0265973
gene17035	LOC109420852	general odorant-binding protein 45	0.0289419	0	0	0	0	0	0	7.8606	0.057449	0.0197289	0	0.0197625	280.201	8.115	0.0193428	0	0.103962	0	0	0	0	0.0448301	0	0	0.024467	0	0	0	0	0.0469777	0	0.0469077	0	0	0.0447051	0	0.0230378	0.0435084	0.0281437	0	0	0	0	0	0	0.0469553	0
gene17113	LOC109420927	chymotrypsin-1-like	0.978268	0.0606463	1097.01	525.037	20.7357	45.3668	106.479	1490.85	780.374	1.07875	0.0405577	0	0.0170876	0	0.192297	0.0358775	0	0.555107	0.0243407	1.34151	0	0	0	0.518985	0	0.0232762	0	0.0641195	0	0.0700544	0.117742	0.0466334	0.0956743	0.176004	0	0	0	0	0.0279791	0.905307	0.0478328	0.0223909	0.0702707	0.0596489	0.244035	0.233403	3.90244
gene1712	LOC109416979	acidic endochitinase SP2	0.0625969	0.0659702	0.0270199	0.0835762	0.0199936	0.0419132	9.65981	4.9561	0.341698	27.6293	78.442	83.1571	137.859	163.62	131.217	166.47	1.88316	0.905757	3.6539	0.627354	223.893	306.057	107.937	8.50556	7.779	8.93779	2.18412	3.06892	3.24892	3.17518	1.46009	2.51099	1.22575	3.6855	1.42618	1.43412	1.59447	2.2114	1.27828	0.173785	0	0.0243565	0	0	0	0	0.0625003
gene17250	LOC109421070	protein G12-like	0.200569	0	0.101425	1316.91	386.606	6.22585	0.992516	1.03369	0.865184	0.0221235	0.155542	0.00620511	0.0643762	0	0.490204	0	0.0582901	0	0	0	0	0	0	1.5139	0	0	0	0	0.00909077	0	0.677325	0	0	0	0	0	0	0	0.0315595	0.434893	0.0215816	0.0101025	0.0174379	0.831158	2.53188	0.0310661	0.117304
gene17251	LOC109421071	protein G12-like	0.634875	0	0.0276637	1446.56	394.555	6.08856	0.771007	1.1722	1.27413	0	0.26584	0.0519671	0.0265635	0	0.464909	0	0.059951	0	0	0	0	0	0.0461747	2.27723	0	0	0	0	0.0093498	0	0.687336	0	0	0	0	0	0	0	0	0.572698	0.044393	0.0103904	0.0244565	0.470555	4.3423	0.12239	0.153975
gene17252	LOC109421067	protein G12-like	0.250187	0	0.00842287	2011.46	315.286	7.43801	1.11522	2.30696	1.70565	0.031829	0.460229	0.0475868	0.113817	0	0.361896	0.0795123	0.0312917	0	0	0	0	0	0	2.66703	0	0	0	0	0	0	0.5658	0	0	0	0	0	0	0	0	0.494012	0	0	0	0.279801	1.73126	0	0
gene17253	LOC109421068	protein G12-like	0.0655124	0	0.00807954	1519.03	358.507	6.26468	0.949642	1.56774	1.24003	0	0.328864	0.00639059	0.0595513	0	0.399864	0.0833567	0.0600325	0	0	0	0	0	0	2.12062	0	0	0	0	0	0	0.646142	0	0.0493971	0.0511153	0	0	0	0	0	0.512849	0.0222267	0.0104045	0.0136054	0.235135	0.948564	0.0184376	0.0760907
gene17256	LOC109421045	protein G12-like	0.624668	0	0.0715091	1986.23	185.821	4.7218	1.5711	1.41688	1.29929	0.0670784	0.351158	0.0212634	0.025891	0.223496	0.539859	0.135903	0.139823	1.96275	0.316121	0.34574	0	0.160622	1.17298	2.70474	0.64918	0.673615	0.471736	0.655553	0.410472	0.61514	0.968462	0.344712	0.222279	0.658603	0.352576	0.313909	1.07429	0.374503	2.11968	1.48871	0.0517684	0.00969328	0	0.797491	8.75433	0.113673	0.20956
gene17257	LOC109421072	protein G12-like	0.129544	0	0.0275456	1162.74	136.141	2.66626	1.41511	0.796252	0.879097	1.00792	0.24737	0.0217875	0.0200863	0.0515869	0.286604	0.0664431	0	0.138507	0.175452	0.0667366	0.0242483	0.0780894	0.113436	1.39499	0.0539479	0.061949	0.011597	0.0829561	0.0525735	0.0258956	0.221968	0	0.015561	0.0365962	0	0.110341	0.241284	0	0.170651	0.290552	0	0.00993216	0	0.60062	6.31363	0.116475	0.23575
gene17259	LOC109421073	protein G12-like	0.571652	0	0.12654	1409.4	127.402	4.0213	1.87222	1.82991	0.774421	0.335725	0.258268	0.150132	0.179904	0.479835	0.518548	0.198003	0.0219384	0.585376	0.0103333	0.134979	0.037131	0.476037	0.706299	2.08359	0.158197	0.197628	0.0770706	0.124126	0.0603786	0.0265678	0.51984	0.112052	0.180518	0.140098	0.113206	0.0773008	0.528153	0.0488443	0.435682	0.68953	0	0.00760446	0	0.26268	5.14187	0.118904	0.164401
gene17524	LOC109421337	cathepsin L2-like	0.955627	0.1151	0.0471424	0.0182272	0.0348834	0.0365635	0.250113	2.4354	0.162592	4.89501	5.11877	57.274	80.2167	7.69533	2.06201	2.09382	0	0	0	0.0475897	0.269745	0.16917	0.132195	0	0	0	0.0396948	0.0405639	0.022494	0	0.0446922	0	0.141228	0	0.0843493	0.165236	0.17387	0.0410456	0.159304	0.126336	0	0	0.0222277	0.150943	0.162103	0.132892	0.218092
gene17542	LOC109421414	uncharacterized LOC109421414	0.100002	0	0	0.155771	0	0.0446392	13.1537	3.94213	0	71.9412	102.127	71.0392	70.2583	111.065	103.928	130.494	7.36399	1.06113	8.54449	1.53967	174.364	287.935	185.094	11.871	13.1038	16.8809	8.8201	11.4894	8.73297	7.6832	3.98311	7.37461	4.40906	16.4655	4.9945	5.6773	5.01493	8.46881	2.39869	0.123392	0	0	0	0	0.0282724	0	0.0998481
gene17668	LOC109421525	probable serine/threonine-protein kinase pats1	0.190362	0.0308646	0.0968336	0.10753	0.0935416	0.689662	10.6604	2.14264	0.290665	12.2678	20.6238	25.7671	38.6149	89.7932	90.1338	107.777	3.34009	0.367263	4.60822	0.506117	143.692	196.543	200.023	12.6488	7.79464	12.6318	5.29024	7.05574	6.03597	3.10582	3.00809	5.7237	2.72672	14.0406	2.43151	2.83146	2.63822	4.82815	0.768925	0.0542043	0.0121717	0.0455815	0	0	0	0.031597	0.219309
gene17739	LOC109421590	uncharacterized LOC109421590	0.241506	0	0	0.066759	0	0	2.23731	24.5548	1.09474	0.0511269	0.340777	0.957357	805.572	1221.26	0.367591	0.249392	0	0.00819968	0	0	0	0.200209	0.190213	0.0115723	0.0139492	0.222472	0.0839606	0.640706	0	0	0.027418	0.12156	0.00628106	0	0.00656493	0.0142653	0.00995025	0	0	0	0	0	0	0	0.0139948	0	0
gene17742	LOC109421605	uncharacterized LOC109421605	0.360448	0.569808	80.3219	22.0473	47.3176	31.6163	142.869	170.056	79.7763	0.245708	0	0	0.107032	0	0	0	0	0	0	0	0	0	0	0.0672762	0	0	0	0	0	0	0.0737502	0	0	0.0689027	0	0	0	0.0677328	0	0	0	0	0	0	0	0.0730989	1.43957
gene17743	LOC109421592	uncharacterized LOC109421592	0	2.2237	133.843	74.3024	57.1008	54.9705	232.042	236.746	232.403	0.392271	0.0337981	0	0	0	0.0640988	0	0	0	0	0	0	0	0	0.035802	0	0.116381	0	0.0712438	0	0.0389191	0.196236	0	0.106305	0.073335	0.0370364	0	0	0	0.0466318	0.0443778	0.0797213	0	0	0	0	0	1.05337
gene17744	LOC109421606	uncharacterized LOC109421606	0	2.16472	159.386	52.1063	73.1738	55.2687	202.194	297.28	174.23	0.260499	0.235668	0	0	0	0.0638499	0.0893454	0	0	0	0	0	0	0	0.0356629	0	0	0	0.0354836	0	0	0.195474	0.193551	0.141189	0.292201	0.0737852	0.289083	0.0380235	0.251335	0.0464507	0.265233	0	0	0	0	0.0405146	0.077499	1.47853
gene17745	LOC109421593	37 kDa salivary gland allergen Aed a 2-like	0.359307	2.04482	252.088	78.0464	97.5186	78.6599	248.294	379.851	295.033	0.277588	0.151943	0.0490695	0.0142258	0.0392512	0.144082	0.104541	0.0860446	0	0.0405284	0.041751	0	0.0927596	0	0.0833373	0.0607505	0.135645	0.0348248	0.106762	0.078937	0	0.196045	0.0194116	0.0708009	0.421266	0	0.0207091	0	0	0	0.110836	0	0	0.0390013	0.016553	0.0406329	0.058294	3.10919
gene17761	LOC109421597	trypsin-7-like	0.121484	0	0	0	0	0	0	0	0	91.0113	1.24152	0	0.0360739	0	0	0	0	0	0	0	0	0	0.0420133	0.0453491	0	0.0982772	0	0	0	0	0	0	0	0	0	0	0	0	0	0	0.0504902	0	0	0	0	0.049274	10.947
gene17973	LOC109421851	xanthine dehydrogenase 1-like	0	0.0485694	0	0	0	0	0.13153	1.22346	0.0127765	0.00438765	0.0302129	0.00879023	37.4725	5.97936	0.106426	0.116377	0.0115604	0	0	0.0056094	0	0	0.00445196	0.00961089	0.0326482	0.010414	0.0233942	0.0239064	0.00349981	0	0	0.0260803	0.0126514	0	0.0248557	0	0	0.0145142	0	0	0.0374515	0.0150269	0.0157199	0	0	0	0.0128533
gene17974	LOC109421858	xanthine dehydrogenase-like	0	0.00338906	0	0	0	0	0.0845663	0.689696	0	0	0.0181317	0	20.3947	3.52439	0.0597477	0.0414617	0.0115514	0	0.00359097	0.01121	0	0	0	0	0	0	0	0	0	0.00521974	0.00789561	0	0	0	0.00496724	0.0147905	0	0	0	0	0	0	0.0104717	0	0	0	0
gene18245	LOC109422168	myrosinase 1-like	0.17005	0.552576	17.9835	0.889249	0.633669	0.787538	1.45787	33.9859	14.4723	0.0579595	0	0	0	0.0154804	0	0	0.0254516	0.738171	1.07893	0.370492	0.0215385	0	0	0	0	0.0573189	0.0824079	0.0842122	0.0233492	0.0230017	0	0.0229675	0	0.043342	0	0.147016	0.36096	0	0.620101	0.681925	0.0588955	0.0661667	0.0461455	0	0	0.137945	2.73075
gene18272	LOC109422115	probable 5-hydroxyisourate hydrolase R09H10.3	0.144144	0	0.0414798	0.0641512	0	0.0643433	0	2.98557	0.0476872	24.6959	43.4476	78.1179	51.0491	64.5081	104.268	130.939	5.86818	1.71492	5.77189	1.2562	120.534	189.04	141.64	11.8018	8.57061	18.8905	7.64897	5.56787	7.00639	11.2696	2.94929	9.1502	2.98235	10.6176	3.45111	3.9878	3.59515	6.21184	3.41077	0.40018	0	0	0	0	0	0	0.191895
gene18307	LOC109422263	uncharacterized LOC109422263	0.397241	0	0	0.037884	0.0181257	0.0189987	2.33929	0.739366	0	33.1717	42.5761	32.5888	33.2978	25.0762	29.7348	46.5613	0.968275	0.273712	0.912146	0.0741839	49.8114	42.4788	30.1056	3.79191	2.68657	4.13172	0.763152	1.26464	1.37919	0.805989	1.1379	1.60958	0.649967	4.14394	0.810828	0.539679	0.496893	1.17302	0.193143	0.0525163	0.0235854	0	0	0	0.0240658	0	0.141653
gene19619	LOC109423716	venom allergen 5	1.22308	1.58194	150.007	85.1012	84.9319	65.0127	240.375	386.819	270.919	0.871641	0.528968	0.284714	0.0825419	0.0910983	0.185778	0.27729	0	0	0.0235156	0.04845	0.190123	0.129172	0.153811	0.103765	0	0.0449743	0	0	0	0.135359	0.227501	0.0225263	0.123241	0.212547	0.0429371	0	0.0442533	0.0208939	0	0.308689	0.115528	0.173055	0.113148	0.0576269	0.18861	0.0676474	3.24726
gene19620	LOC109423715	venom allergen 5	0.0601481	0.190168	15.8374	5.52108	7.30036	5.19529	10.2143	25.3483	16.1777	0.0205007	0.0211961	0.0205356	0	0	0	0	0	0	0	0	0	0.0465839	0	0	0	0.024329	0	0	0	0	0	0	0	0.0689869	0	0.078001	0	0	0	0	0	0	0	0.0415647	0	0.0487921	0.090083
gene19879	LOC109423899	uncharacterized LOC109423899	0.743513	0.0681374	0	0	0	0.108225	6.78811	4.53575	0.160419	118.114	198.765	118.713	107.511	76.6315	51.3117	74.713	0.812845	0.654859	0.464905	0.309896	62.9159	25.7626	5.83576	2.0273	1.85833	2.19671	0.91645	0.936515	0.958758	0.760841	0.582055	0.943085	0.286646	2.34821	0.274634	0.670747	0.463177	0.558863	0.12574	0.119663	0.0537412	0	0.0263169	0	0	0	0.580982
gene19880	LOC109423900	uncharacterized LOC109423900	0.617588	0	0	0.0687143	0.0328765	0.05169	2.01271	1.54739	0.0255396	60.132	63.1629	39.1488	30.3966	29.5867	24.1461	33.6112	0.115544	0.0496461	0.174153	0.0224259	17.307	5.52053	2.20702	0.480293	0.217541	0.35389	0.0561167	0.248496	0.127199	0.355035	0.147423	0.271093	0.0760591	0.0983809	0.198741	0	0.0409667	0.0773685	0.175162	0.0238136	0	0.0200254	0.0209489	0	0	0.0208745	0.693714
gene19884	LOC109423902	uncharacterized LOC109423902	1.13251	0.397846	112.163	42.2958	39.7899	44.2761	135.175	274.736	170.224	0.386001	0.0886875	0	0	0.0687314	0.294346	0	0	0	0	0	0.0956288	0	0	0	0	0.101796	0	0.0467367	0	0	0.102986	0.101973	0.0929827	0.144326	0	0	0	0	0	0.116449	0	0	0	0	0.213453	0	2.5128
gene19885	LOC109423903	30 kDa salivary gland allergen Aed a 3-like	0	0.390136	164.846	68.3868	74.2538	88.9166	178.114	394.784	255.915	0.160584	0.094875	0	0	0.0367633	0.13495	0.0209817	0	0	0	0	0	0	0	0.15075	0	0	0.0733893	0.0499974	0	0.10925	0.0275428	0	0.0248675	0.463184	0	0	0	0.0505911	0	0.155717	0	0.0261891	0.0547939	0	0.0285431	0.0272996	9.6772
gene19886	LOC109423904	30 kDa salivary gland allergen Aed a 3-like	0.08246	2.52021	310.014	138.257	158.473	146.204	433.497	671.654	430.819	0.768217	0.213098	0.0187689	0.0489718	0	0.0551107	0.137096	0	0.0530298	0.0465058	0.0479087	0	0	0.0570348	0.0615634	0.0464736	0.0222359	0	0.0816717	0.0452895	0	0.224959	0	0.162486	0.777638	0	0	0	0	0	0.279803	0.045695	0	0.0223767	0	0.209816	0.289864	19.0738
gene19975	LOC109424063	uncharacterized LOC109424063	0.472919	0	0	0	0	0	0.0185134	12.8585	0	0.698485	0.364174	0.484389	456.359	4.10429	0.444835	0.289389	0.605582	0.0253444	0.0592704	0.0076323	0.0532444	0.203483	0.278643	0.0719226	0	0.0212543	0.0381969	0.00650554	0.0144301	0.0142154	0.100347	0.070971	0	0.00669649	0.0202916	0	0.0139424	0.0263312	0	0.0486276	0.0145593	0.020446	0.0142593	0.0302598	0	0.0142086	0.0174885
gene19976	LOC109424000	uncharacterized LOC109424000	0.0832507	0	0	0	0	0	0.0293312	2.96194	0.123938	0.1135	0.0586748	0	100.514	32.8763	0	0	0	0	0	0	0	0	0	0	0	0	0	0.0618411	0	0	0	0	0	0	0	0	0.0662677	0	0	0	0	0	0	0	0	0	0
gene20000	LOC109424007	geranylgeranyl pyrophosphate synthase	0.143027	0	0	0	0.0152277	0	12.0772	0.358358	0.094635	0.503738	0.184809	0.146495	9.28919	46.7842	0.350494	0.549895	0.0642208	0.206955	0.0133096	0.0415487	0.398546	0.369241	0.379219	0.0711876	0.624714	0.289261	0.17328	0.194782	0.176748	0.290196	0.162709	0.0579528	0.0352289	0.25518	0.0787971	0.0206088	0	0.0537531	0	0.0441198	0	0	0	0	0	0	0
gene20003	LOC109424086	B-cell lymphoma 6 protein	0.174086	0	0	0.00726348	0	0	2.87246	0.77051	0.0539935	7.92911	11.9386	15.8943	18.4013	27.2504	25.3812	24.2325	0.921785	0.104957	0.978804	0.13275	49.3953	64.7866	93.7667	5.08638	1.83962	3.82742	1.81783	2.03674	1.68214	1.26575	0.647025	0.993349	0.377873	2.49036	0.47058	0.578504	0.412774	0.860027	0.370311	0.0100689	0	0	0	0	0.00922822	0	0.0108636
gene20005	LOC109424092	zinc finger protein with KRAB and SCAN domains 5	0.230686	0.0155247	0	0.0196679	0	0.0197268	1.73513	1.09988	0.0146203	11.6534	14.5792	12.5751	16.9624	29.586	25.553	28.8865	0.820181	0.0994706	1.21503	0.064189	40.3627	58.1229	36.9077	3.31761	1.79327	2.79259	1.54025	1.15619	1.29442	1.14772	0.602809	0.89126	0.736486	2.65824	0.53859	0.617671	0.523675	1.14777	0.43203	0.0408967	0	0	0	0	0	0	0.0147082
gene20006	LOC109424091	zinc finger protein Gfi-1b%2C transcript variant X1	0.563372	0	0	0.00545062	0	0	2.67794	0.925975	0	12.6262	14.4188	13.2495	14.0942	27.1508	26.2879	28.1858	0.256627	0.0393807	0.374093	0.0355777	36.639	46.7891	23.7922	0.973243	0.724752	1.08099	0.378898	0.369969	0.466418	0.441719	0.133646	0.370529	0.172912	0.916486	0.203933	0.295342	0.24268	0.29053	0.125764	0	0.0135735	0	0	0.0188449	0	0.0066233	0.0326089
gene20007	LOC109424085	transcription factor Sp4	0	0	0	0.0176021	0	0	2.55469	1.09666	0.0261692	8.24317	10.6731	13.3953	20.3333	34.1156	33.2563	34.7102	0.378855	0.025435	0.490728	0	49.1932	56.6479	30.6919	1.61754	1.22597	1.67443	0.632501	0.77033	0.488756	0.57136	0.420803	0.555552	0.428637	1.36088	0.254551	0.341934	0.172104	0.416198	0.2564	0	0	0	0.0107327	0	0	0	0.0658162
gene20009	LOC109424089	Krueppel homolog 1%2C transcript variant X1	0.0248868	0	0	0	0	0.0166635	1.58406	0.282591	0	16.0939	19.5402	15.9471	16.2889	25.8697	27.509	31.005	1.41916	0.192055	1.61059	0.281951	38.1994	43.9207	45.0364	4.26413	3.37674	4.60031	2.3458	2.96711	2.38346	1.66632	1.16098	3.05541	0.983844	4.14686	1.0187	1.46307	1.10936	1.66953	0.56871	0	0	0	0	0	0	0	0.0869693
gene20010	LOC109424093	zinc finger protein 8%2C transcript variant X5	0.0220336	0.0116105	0	0.0147091	0	0.0147531	4.16608	1.18958	0.0546705	19.4969	27.1959	23.4432	31.73	52.4582	51.421	52.661	1.86827	0.340075	2.17004	0.31357	75.7978	94.1702	70.7189	5.59217	4.20092	7.38828	3.10722	3.40308	3.34148	2.20846	1.41108	3.05188	1.51693	6.76148	1.29331	1.24447	1.10495	1.91701	0.573145	0.061171	0.00915742	0	0	0	0.0186879	0	0.0879986
gene20011	LOC109424090	uncharacterized LOC109424090	0	0	0	0	0	0.00928516	3.08781	1.59827	0	21.4205	18.8338	15.7944	21.4207	34.1378	34.8136	36.9118	0.921536	0.0802621	1.14967	0.0362556	46.0763	60.4573	42.9221	3.16805	1.66469	3.25329	1.24996	1.41124	1.2567	0.979143	0.522072	1.09006	0.584077	1.59051	0.503374	0.74331	0.286998	1.16742	0.377576	0.0641652	0.0115268	0	0	0	0	0	0.0276918
gene20063	LOC109424118	polyadenylate-binding protein 1-like	0.959597	0	0	0	0.290894	0	1.51628	0.874291	0.0577207	5.23307	9.80993	10.7024	16.9758	20.0602	14.0509	15.1201	1.04454	0.196354	0.951024	0.37151	22.3859	33.8266	29.7399	3.25776	2.4091	2.49352	1.56419	1.44724	1.97257	1.25079	1.02335	1.56328	0.615821	2.5125	0.920788	1.00559	0.439787	1.04914	0.377212	0.0807298	0.0401236	0	0.0317215	0.0200945	0	0.0943545	0
gene20111	LOC109424199	histidine-rich glycoprotein-like	0	0	0	0	0	0.0628698	0.0661631	18.4913	0.465951	0	0.23162	0.288517	604.197	186.656	0.0627532	0	0	0	0	0	0	0.0363603	0.0974163	0	0	0	0	0.348741	0	0	0	0.152181	0	0	0	0.0405883	0	0	0	0	0.0257558	0	0	0	0	0	0
gene20112	LOC109424200	vitelline membrane protein 15a-1-like	0.0466804	0	0	0	0	0	14.7362	38.3626	1.89952	0.0636418	0.164501	0.159375	1368.54	1933.83	0.561564	0.291036	0	0	0	0	0	0.10846	0.0968617	0	0	0.0755261	0.237529	1.00559	0	0	0	0.0756575	0	0	0	0	0	0	0	0	0	0	0	0	0	0	0.0932168
gene20113	LOC109424223	adhesive plaque matrix protein-like	0.0133917	0	0	0	0	0.0179335	0.113237	2.64401	0	15.802	66.7109	278.942	89.0275	0.80461	1.11876	0.517655	0.288627	0	0.011329	0	0	0.0207434	0	0	0	0.021667	0.0194693	0.0298433	0	0	0.0219203	0.032557	0.00989555	0	0	0.0694663	0.0746188	0	0.0520895	0	0	0.0521073	0.0218042	0.0185084	0.159015	0	0.320905
gene20134	LOC109424207	vitelline membrane protein 15a-2	0	0	0	0.244507	0.506935	1.18532	10.8112	563.374	0	35.7863	3660.65	16102.5	21557.1	117.877	3.00514	1.44623	0	0	0.103282	0.0531989	0	1.98565	1.64665	0	0.0516053	1.43209	3.1798	1.93442	0	0	0	1.8798	0.045107	0	0.0471456	0	0.0971816	0	0.0593601	0.395436	0	0	0	0.0421835	0.0517742	0	0.121899
gene20135	LOC109424208	histidine-rich protein PFHRP-II-like	0.0298189	0	0	0	0	0	0.0420236	24.6251	0	0.121961	5.53778	223.242	1001.64	0.700352	0.0597867	0.0557732	0	0.0287646	0	0	0	0.138566	0.0412494	0	0	0	0.0650273	0.0886014	0	0	0	0.0724937	0	0	0	0	0	0	0	0	0	0	0	0	0	0	0
gene20136	LOC109424210	vitelline membrane protein 15a-1-like	0	0	0	0.20954	0.651658	1.39236	12.1415	558.67	0.194704	38.768	1369.9	12723.5	19420.8	136.042	2.36892	1.16586	0.0704688	0.0756964	0.0663838	0.0683864	0	1.21549	1.62827	0	0	0.952207	2.49557	1.70966	0	0.0318429	0.0321113	1.55798	0	0.0600014	0	0	0	0	0	0.326782	0	0	0	0	0.166388	0	0.0783497
gene20202	LOC109623044	uncharacterized LOC109623044	0.485828	0.954199	24.6502	15.435	13.6554	22.4751	36.9725	81.3571	39.9114	0.451605	0.249026	0.120633	0.209837	0.132681	0.236142	0.316665	0.138818	0.0426047	0.130771	0.134716	0.100694	0.188134	0.152741	0	0.0746748	0.142917	0.0802627	0.08202	0.200124	0.0358447	0.108441	0.107374	0	0.0506564	0.0341107	0	0.0703127	0.0497964	0.0429481	0.0408722	0	0	0.0359554	0	0	0.0716553	2.64588
gene20203	LOC109623038	nucleolin-like	0.228031	1.7812	35.1839	12.4111	11.0022	9.11611	31.2101	75.8471	47.1276	0.182875	0.189078	0.0457964	0.0955938	0.0805927	0.0986122	0.20071	0.0240916	1.02221	0.192908	1.19236	0.101938	0.0519433	0.0649442	0.0400576	0.034019	0.0217024	0.0195011	0	0	0	0	0	0	0	0.0621582	0.0115967	0.0213545	0.0504118	0.0521747	0.359983	0.133796	0.104385	0.218399	0	0.0113768	0.0326434	2.53126
gene2059	LOC109421112	uncharacterized LOC109421112	0.0336533	0.0354669	0.261476	0.0449322	0.0429959	0.0225333	23.5477	0.505917	0.233804	0.0917625	0.0711563	0	10.3329	204.092	0.13495	0.146872	0	0.0324635	0	0	0	0	0.0465537	0	0	0.0272245	0.0489262	0.149992	0.0277251	0	0	0.0272719	0	0.411719	0	0	0	0	0	0	0	0	0	0	0	0.191097	0.0672028
gene20977	LOC109425029	serine protease gd-like	0.617415	0.274735	0.544859	0.228984	0.140234	0.358284	3.26778	2.04886	0.898743	23.2979	26.6893	27.7095	36.5778	50.0159	48.6363	57.6094	0.628383	0.158823	0.766061	0.0717428	46.7265	34.7477	36.0047	7.10891	5.76468	5.24999	4.46814	4.55577	3.22148	3.67463	3.2789	2.81302	1.56131	6.6723	2.02395	1.50645	1.48531	2.56792	1.22746	0.0761823	0.125451	0.138804	0.100527	0.104294	0.15128	0.189209	0.438374
gene20985	LOC109425033	serine protease gd	0.0318454	0.0335615	0.0824764	0.26574	0.020343	0.0319842	2.2552	1.11706	0.0790157	18.376	14.1625	10.9269	18.052	25.5259	24.678	28.2133	1.4299	0.0921586	1.10455	0.346912	29.6707	43.2604	46.2664	3.86348	2.6787	3.55515	1.74774	2.12902	1.8365	1.30519	0.951307	1.94841	1.08245	2.65416	1.14367	1.14257	1.10268	1.32848	0.526441	0.132616	0	0.136302	0	0	0	0	0.111287
gene2115	LOC109623164	general odorant-binding protein 45-like	0.024774	0.54829	0.0641621	0.347308	0	0	2.11229	1.83733	0.147528	0	0.0349213	0	45.3061	55.9536	0.115901	0.123566	0	0	0	0	0	0	0	0	0.0418871	0	0.0360171	0.0552086	0	0	0	0	0	0	0	0	0	0	0	0	0	0	0	0	0	0	0
gene21244	LOC109425286	uncharacterized LOC109425286	0.34845	0	0	0	0	0	0	0	0	70.6889	0	0	0	0	0	0	0	0	0	0	0	0	0.0482022	0	0	0	0	0	0	0	0	0	0	0	0	0	0	0	0	0	0.115856	0	0	0	0	0.339195	10.9245
gene2129	LOC109420846	histone H1	0.292615	0.0220274	0.108263	0.013953	0.0133517	0.0419844	5.95007	2.01094	0.0622324	16.7317	37.687	33.9339	59.5114	65.5106	53.5379	65.0383	0.919716	0.483891	2.02172	0.400732	88.7542	43.3074	18.5093	3.83869	2.40304	2.13045	1.84842	1.49049	2.60011	1.4249	1.14029	1.53558	0.787667	2.94063	1.00083	0.758936	0.815228	1.38251	0.386168	0.0386845	0.0347469	0.0162653	0.0170154	0.0288869	0.0531819	0.0508649	0.0626065
gene21573	LOC109425627	major royal jelly protein 1	0.470408	0.0550842	0	0	0	0.0116656	0.208704	8.87022	0.242083	0.130641	0.257866	0.0475868	298.034	138.747	0.0931521	0.0543117	0.0312917	0.100839	0.103172	0.121468	0.0529616	0.053974	0.241011	0.455258	0.206202	0.140943	0.164641	0.207071	0.0143535	0.0848393	0.0855545	0.0423564	0.141614	0.079931	0.0403676	0.030125	0.0970784	0.0785739	0.135536	0	0	0	0.0992848	0.0481585	0.0886615	0	0
gene21657	LOC109425719	brachyurin-like	0.705198	0.0285847	0.0234153	2067.66	96.5309	2.45171	0.420467	2.85422	1.29213	0.0924454	0.15293	0.0185205	0.0483239	0.118518	0.58007	0.0845514	0	0.0261641	0	0	0.0206124	0.0420128	0.0750403	2.32871	0.0229294	0.0438834	0	0.0201478	0	0	0.155388	0	0	0	0	0	0	0	0	0.276101	0	0	0.0220807	0.506062	0.667128	0.0220022	0.108325
gene21660	LOC109425720	serpin B11-like	0.0715133	0.188418	50.6247	17.3298	21.3226	20.8771	63.9722	78.2833	59.141	0.0731233	0.0378018	0.0122079	0.0424707	0	0.035846	0	0.0642208	0.0344925	0.0756226	0.0155808	0	0	0.0247317	0.040043	0.0151141	0.014463	0	0	0.029458	0.0580393	0.0146321	0	0.0132108	0.123033	0	0	0	0	0	0.0165449	0.118887	0.111304	0.203765	0	0.0303271	0.0145029	2.55266
gene21713	LOC109425797	uncharacterized LOC109425797	0.160004	0.632348	99.1781	36.2101	67.485	38.4344	69.8745	183.73	92.8993	0.0545353	0.11277	0	0.213804	0	0.187137	0.498785	0	0.23152	0	0.0697208	0.121596	0	0.110669	0.0597281	0	0.0647191	0	0	0	0	0.130952	0	0.118232	0.122344	0	0	0.0636816	0	0	0.14807	0	0	0	0	0.0678537	0	0.798784
gene21770	LOC109425755	integumentary mucin C.1-like	0.127354	0	0.0366483	0.0141697	0	0	0.0149566	0.106363	0	0.781328	21.6767	34.8572	1.03366	0.0695617	0.0141858	0	0.285918	0.0409505	9.53478	0	0	0.016439	0.0146811	57.5872	169.175	128.525	2.11381	2.45966	2.69295	0.189491	0.469036	0.361217	0.156843	0.584276	0.0163932	0.0183505	0.101374	0.0638173	0.0206403	0	0.0176432	0	0.155517	0.0293355	0	0.0344366	0
gene21878	LOC109425891	uncharacterized LOC109425891	0.374764	0.225691	42.198	26.0905	16.4161	17.6728	31.8023	132.745	50.8508	0.109486	0	0	0	0	0	0.0333789	0	0	0	0	0	0	0.0370302	0	0	0	0	0	0	0	0	0	0	0.0818735	0	0	0	0	0	0	0	0	0	0	0	0	0.10691
gene21898	LOC109425892	uncharacterized LOC109425892	0.385388	0.225642	0.0369672	0	0.0273542	0.315388	0.150868	3.77657	0.127498	7.76452	6.15672	2.807	92.2625	2.05823	1.65988	2.08239	0.0384542	0	0.253576	0.0746358	0.130168	0.132657	0.0888532	0.159847	0.470601	0.381049	0.124508	0.0636172	0.0705555	0	0.105137	0.31231	0.18985	0.130969	0.0330717	0.0370205	0	0.257491	0.0832798	0.237763	0.0711872	0.0333233	0.139441	0.0295908	0.25423	0.0694725	0.299283
gene2190	LOC109421753	uncharacterized LOC109421753	0.851595	0.115725	1.36214	0.0770798	0.0301053	0.0782572	0	0.646604	0.100563	20.6726	6.74305	7.30751	7.02984	6.65286	4.78091	1.65893	0.122733	0.112744	0.316555	0.218909	6.76259	7.72186	9.34835	2.38165	2.8793	2.3035	0.511125	0.834935	0.233731	0.336583	0.385705	0.28185	0.961838	3.8183	0.285723	0.282355	0.625352	1.22176	0.456903	0.498493	0.953872	0.408924	1.32056	0.105843	0.0999282	0.0776066	0.244685
gene21910	LOC109426009	uncharacterized LOC109426009	0.121845	0.0770469	0	0.0650727	0.0311342	0.00815843	1.28787	5.06777	0.459535	0.0498354	0.0858762	0.0499201	191.42	415.433	0.154723	0.0835631	0.0547102	0.0705225	0	0.0424748	0.0185195	0.0754941	0.269684	0	0.123607	0.137997	0.0885712	0.325837	0.060229	0.0791105	0.059833	0.0888667	0.0900353	0.0372668	0.131746	0.0842725	0.0969891	0.0183171	0.047394	0.0451031	0	0	0	0.0336799	0.0826747	0	0
gene21911	LOC109425893	uncharacterized LOC109425893	0.232708	0	0	0	0	0.0222593	0.140552	3.29844	0.0659888	0.113308	0.0702908	0	128.666	195.036	0.0444361	0	0.029854	0.0320687	0.0281234	0	0	0	0	0.0248195	0	0.0537868	0.0483311	0.123473	0	0	0.0272079	0	0	0	0.0770257	0	0	0	0.0323272	0	0	0	0.0270637	0	0	0	0
gene21912	LOC109425877	uncharacterized LOC109425877	0.066804	0	0	0	0	0.0223651	6.63733	0.0334759	0.132605	0.0227693	0.0235416	0.022808	0.0991848	49.57	0.200913	0	0	0.0644422	0	0.0291095	0	0	0	0	0	0	0.0242804	0.024812	0	0	0	0	0.0246818	0.0255403	0	0	0.0797642	0.0251067	0	0	0	0	0	0	0	0.0541914	0
gene21919	LOC109426012	N-acetylgalactosaminyltransferase 4-like	0.0530185	0.0977823	0.160198	0.123878	0.067737	0.0976242	0.448312	3.28114	0.276257	0.0813181	0.0373673	0.0905072	109.984	12.9374	0.221462	0.165276	0.071418	0.754374	0.078491	0.346538	0.423065	0.20531	0.265865	0.0593742	0.044821	0.0857807	0	0.0196919	0.0218395	0	0.0650878	0.08593	0	0.0608096	0	0	0	0.0199257	0.0257781	0.0367982	0.154245	0.103148	0.021581	0.0183189	0	0.0645129	0.608772
gene22043	LOC109426161	uncharacterized LOC109426161	0.14456	0.00761754	0.0311997	0.0554903	0.0046173	0.0169389	0.855659	1.3981	0.0322819	109.469	71.1349	98.2149	45.9095	13.1922	22.8686	24.4248	0.0843824	0.0278899	0.125351	0.0188974	8.50591	5.48045	3.58955	0.890394	0.244418	0.494093	0.29686	0.354367	0.148869	0.228781	0.156764	0.231368	0.178924	0.226598	0.133977	0.0749873	0.103563	0.124958	0.112459	0	0.0330445	0.0224995	0.0294214	0.0124871	0.0214566	0	0.155163
gene22093	LOC109426209	uncharacterized LOC109426209	0.0625969	0	0	0	0	0	0.154381	1.47428	0.0310634	0.256025	0.0882362	0.170973	56.8969	13.078	0.125506	0.039027	0	0	0	0	0.142713	0	0	0	0	0	0	0	0	0	0	0	0	0	0	0.0541177	0.0498272	0	0	0	0	0	0	0	0	0	0.0625003
gene22094	LOC109426212	uncharacterized LOC109426212%2C transcript variant X1	0.346487	0	0	0	0	0.0110475	0.0290656	9.79752	0	0.579232	0.261646	0.35489	315.698	2.73066	0.286704	0.221166	0.688985	0.0238741	0.0837478	0.00718952	0.11285	0.1789	0.182593	0.0184773	0	0.0200213	0.0119936	0	0.0135929	0	0.0405107	0.0401122	0.0121919	0.0315399	0.00637145	0	0	0.0248036	0	0.0610753	0.0137146	0.00641993	0	0.0171026	0	0	0.0164739
gene22350	LOC109426495	general odorant-binding protein 45-like	0.156492	0	0	0	0	0	0.220544	2.97993	0.217444	0	0	0	121.768	150.143	0	0.039027	0.0281068	0.0301919	0	0	0	0	0	0	0	0	0.0227513	0.0929977	0	0.101606	0	0.0507271	0	0	0	0	0	0	0	0	0	0	0	0	0.0265458	0.0507786	0
gene22356	LOC109426496	general odorant-binding protein 45-like	0.319488	0	0	0.0533205	0	0	6.94777	1.84112	0.184969	0.0181489	0.075058	0.0545394	48.3677	415.611	0.0355873	0.165992	0	0	0.0450462	0	0	0.0412399	0	0	0	0.0861521	0	0.158217	0	0	0	0.043151	0.0393466	0	0	0	0	0.0400239	0	0	0	0	0	0	0	0.129584	0
gene22359	LOC109426499	general odorant-binding protein 45-like	0.0585728	0	0	0	0	0	1.19692	0.176107	0	0	0.0412819	0	5.09608	21.4832	0.0391461	0.0365181	0	0	0	0	0	0.0907277	0	0	0	0	0	0	0	0	0	0	0	0	0	0	0	0	0	0	0	0	0	0	0	0	0.0877237
gene22361	LOC109426501	general odorant-binding protein 45-like	0	0	0	0	0	0	1.65377	0.113356	0	0	0	0	4.60129	21.6691	0	0	0	0	0	0	0	0	0	0	0	0	0	0.0420093	0	0	0	0.0458293	0	0	0	0	0.0225082	0	0	0	0	0	0	0	0	0	0
gene22383	LOC109426530	protein cortex%2C transcript variant X3	0.37489	0	0	0	0	0	2.23174	0.829176	0	17.7918	13.6211	16.754	15.6668	18.2102	20.6662	18.9323	0.174135	0.0872915	0.174977	0.0337979	19.894	9.37122	6.41094	0.714195	0.371569	0.721586	0.319498	0.403316	0.266252	0.283273	0.285661	0.251423	0.152838	0.553539	0.119809	0.0894094	0.185222	0.174902	0.0628537	0	0	0.0503001	0.010524	0.0446662	0.0438571	0.0838928	0.0258146
gene22488	LOC109426670	chymotrypsin-2-like	0.0529614	0.111631	1.60025	4227.2	1009.38	20.9223	2.7243	5.73249	6.67559	0.072205	0.709214	0	0	0	0.991083	0.0660393	0.0475607	0	0.582448	0.0461553	0	0	0.0366316	5.53562	0.626818	0.385598	0.461981	0.472096	0.305424	0.128948	1.64712	0.0858375	0.0391348	0.404961	0.0409035	0.0915749	0.0421574	0.0796171	0.103002	0.784183	0	0.0412147	0.172462	1.28094	4.35717	0.515548	0.264399
gene22489	LOC109426634	serine protease SP24D-like	0	0	0.0508687	2365.58	921.368	18.0303	1.28713	5.43296	3.68431	0	0.373762	0	0	0	0.590707	0.220421	0	0	0	0	0	0	0.0407554	2.72747	0	0	0.0428324	0.0437702	0	0	1.15739	0	0	0.0901098	0	0	0	0	0	0.654347	0	0	0	0.162874	0.199904	0	0
gene22498	LOC109426636	serine protease SP24D-like	0	0.0306095	0.601775	509.744	90.7461	6.04811	4.216	3.78412	5.21755	0.118793	0.184233	0.0991625	0.155241	0.11105	0.0970564	0.0724327	0.312991	0	0	0	0.0662176	0.0449889	0.100445	0.520418	0.0245536	0.046992	0.0633383	0	0	0	0.285249	0	0.0858471	0.0888332	0	0.0502202	0.0924775	0	0.0282433	0.0537563	0	0	0	0	0.0739021	0.0942431	0.289996
gene22501	LOC109426678	serine protease SP24D-like	0.491433	1.46235	2343.53	1634.76	266.025	529.374	573.618	2380.92	2906.46	2.50263	0.468606	0.0197393	0.0343359	0.0947379	0.734161	0.270346	0	0.195201	0.122276	0.138561	0	0.111944	0.0199946	2.16901	0	0	0	0.0214736	0.0952624	0	0.425862	0	0.694229	0.817845	0	0.0999683	0.0920428	0	0.0281106	1.47135	0.216259	0.112481	0.0470674	0.319623	0.956211	3.16576	49.6015
gene22502	LOC109426609	serine protease SP24D-like	0.102077	0	12.3079	162.773	18.4102	1.02522	0.959044	0.716121	4.72783	0.0695834	0.119906	0.0697018	0	0	0.113702	0	0	0	0	0	0	0	0	0.381046	0	0	0	0	0	0	0	0	0	0	0	0	0	0	0	0.0944639	0	0	0	0	0	0.0552033	0.271786
gene22570	LOC109426728	uncharacterized LOC109426728	0	0	0	0.0496155	0.0474773	0	4.87048	2.38357	0.0737639	30.9554	72.1299	54.7589	55.2176	46.1973	49.2247	68.1157	6.40734	1.79236	10.8772	2.26698	126.406	290.224	195.343	15.2036	13.5714	18.6986	7.5636	11.5386	10.8377	7.41921	2.49392	7.7093	3.29513	13.639	5.51048	5.59015	5.62024	10.0556	2.67407	0.61901	0.061778	0	0	0	0	0	0.222622
gene22571	LOC109426777	uncharacterized LOC109426777	0.0507752	0.0802671	0	0.0677924	0	0.0849942	6.06447	3.99467	0.125985	11.5605	17.2668	33.1802	90.3735	103.003	106.216	122.986	11.6501	1.7143	12.3279	3.54	207.425	384.025	349.316	62.8324	17.1698	28.5475	9.67022	12.6164	14.4944	14.4436	6.44116	16.9732	5.85302	21.9746	6.5293	11.2597	9.45761	12.4419	4.3203	0.0939765	0.0422054	0.0197567	0	0	0.0215325	0	0.278833
gene22572	LOC109426729	uncharacterized LOC109426729	0.0227994	0.0240281	0	0.0456609	0.0145644	0.0305317	4.94819	1.66804	0.0452564	3.96316	10.8305	15.6461	21.3665	47.2723	47.6174	55.2382	2.98927	0.615814	3.31747	0.854387	77.1555	113.717	109.504	11.5407	4.47163	7.65428	3.56324	3.94611	4.09474	3.81177	1.04494	3.91694	1.46571	4.58493	2.07781	2.06966	2.79485	3.77019	1.5076	0.295386	0.113708	0	0	0	0.0193374	0	0
gene22585	LOC109426732	collagenase-like	0.0550348	0.0870009	0	454.454	513.128	2.67161	0.872553	0.606723	0.655459	0	0.0193942	0	0	0.0300604	0.183908	0.0343124	0	0	0	0	0	0	0	0.636866	0	0	0	0	0	0	0.65311	0	0.0406669	0	0	0	0	0.0206835	0	0.331046	0	0	0	0.456374	2.26388	0.267866	0.0549499
gene22589	LOC109426787	collagenase-like	0.224473	0.0567315	0.665942	423.162	897.348	65.4049	11.8472	0.961923	1.03754	0.0183475	0.0504597	0.0367574	0	0	0.101814	0.0335615	0	0.0778911	0	0	0	0	0.0372328	0.632978	0	0.0143706	0	0	0	0	1.35826	0	0.106205	0.0514508	0	0.0153578	0	0	0.052346	0.448342	0	0	0	0.0866737	0.125555	0.611343	0.0403107
gene2259	LOC109423279	serpin B9-like	0.194779	0.328441	76.9802	21.949	25.0718	26.8402	78.5621	106.019	81.7534	0.159331	0.0137279	0.0399005	0	0.0212779	0.0130177	0	0	0	0.0164777	0.0169748	0	0	0.0269444	0.0436257	0.0164663	0.015757	0	0	0	0	0.0159413	0	0.10075	0.104254	0	0	0	0	0	0.0540756	0.0647617	0.151577	0.126855	0	0.0330404	0.142204	3.05331
gene22590	LOC109426788	collagenase-like	0.179686	0.029869	0.0978694	292.562	393.226	47.9017	20.4102	0.464128	0.820237	0	0	0	0.0504951	0	0.11365	0	0	0.0273397	0	0	0	0	0	0.462122	0	0	0	0	0	0	0.502418	0	0.0557071	0.0108355	0	0.0161717	0	0	0	0.332045	0	0	0	0	0.116344	0.122771	0.0611236
gene22610	LOC109426802	O-acyltransferase like protein-like	0.351437	0.0634929	0.60679	0.0402189	0.00641428	0.0874018	2.85139	2.23405	0	23.3679	24.847	22.5918	56.9787	36.7132	31.4869	31.3075	0.712353	13.0471	13.0559	16.635	26.5246	8.31325	2.99332	0.787132	0.679083	0.763554	0.226269	0.425151	0.47152	0.513399	0.534162	0.756745	0.259687	0.77545	0.240404	3.19458	3.90043	0.649074	5.74131	4.37661	4.12309	2.91461	4.84739	0.49959	0.92828	0.130325	0.310792
gene2262	LOC109423401	brachyurin-like	0.79872	0.0280588	0.0229845	2135.99	97.6346	1.8718	0.675379	2.42815	1.05696	0.0907446	0.112587	0.0181798	0.0158116	0.0872532	0.604985	0.149392	0	0.0256827	0	0	0.0202331	0	0.0736596	2.60389	0.0225075	0	0	0.0197771	0	0	0.239688	0	0	0	0	0	0	0	0	0.123192	0	0	0.0216744	0.459955	0.745179	0.0215974	0.0531659
gene22853	LOC109426965	uncharacterized LOC109426965	0.572106	0.0334965	0.0274388	0.031827	0.0609108	0.0212815	1.50055	1.03526	0.094635	12.0356	20.8778	15.4525	19.8952	21.5096	18.1938	20.4601	0.228341	0.06132	0.053776	0.0553983	16.5457	7.10173	1.4839	0.450855	0.389607	0.475673	0.427425	0.118049	0.340403	0.206362	0.14307	0.103027	0.0469719	0.413149	0.0245474	0.151131	0.101199	0.0836159	0.139082	0	0.0924675	0.0371012	0.0517498	0.131782	0	0.0773488	0.095204
gene23131	LOC109427347	cytochrome P450 CYP12A2-like	0.359657	0.0606463	0.173876	0.172871	0.266511	0.346776	1.65237	1.13903	0.128504	7.68852	8.24335	9.126	21.8294	18.9925	12.5858	15.8309	0.0775157	0.291431	0.425963	0.55165	15.2953	10.8969	4.67674	0.537029	0.352696	0.581904	0.648372	0.908359	1.20891	1.36606	0.353225	0.524625	0.116935	1.49603	0.322217	1.41788	2.07273	0.400099	2.95179	0.106507	0.227206	0.190323	0.0468471	0.0397659	0.109816	0.116702	0.387831
gene23478	LOC109427709	uncharacterized LOC109427709	0.620835	0.395028	0.859556	0.129517	0.0743611	0.259809	1.6859	0.311104	0.385108	11.6208	20.1596	12.5016	7.92346	18.7283	15.1276	20.0792	0.569373	0.305432	0.919112	1.2735	11.6036	17.6151	21.9627	4.01685	3.43904	3.03979	2.07313	2.8345	1.44938	2.35114	1.24931	1.92314	1.1423	3.14496	1.43846	1.31971	0.818495	1.90044	0.981033	0.772027	0.580557	0.452939	0.516157	0.294952	0.641747	0.960028	1.09796
gene23562	LOC109427869	uncharacterized LOC109427869	0.440954	0.0244588	0.0801421	0.170424	0.103778	0.0519019	0.201802	0.108389	0.0460676	6.82112	10.175	8.68812	8.99006	10.3554	15.4946	20.63	0.270939	0.059551	0.130758	0.0809024	24.618	4.10426	1.97539	0.30911	0.222488	0.24407	0.26149	0.252734	0.385457	0.0376708	0.265918	0.269697	0.20579	0.384372	0.316542	0.120386	0.129316	0.296555	0.135408	0.0141749	0	0.0541818	0	0.0962261	0.0787359	0	0.185378
gene23708	LOC109427970	uncharacterized LOC109427970	0.970321	0.0975791	1.13518	0.323465	1.68237	9.87951	0.016969	0.798947	0.676638	0.00396244	0.0155095	0.00935592	0	0.0319766	0	0.0194147	0.0522004	0.0516671	0.0902702	0.0224342	0.0419661	0	0.0453744	0.050217	0.269219	0.116888	0.0295778	0.0564414	0.106723	0.110526	0.100924	0.0716678	0.0352824	0.0406369	0.140453	0.146455	0.175165	0.0530545	0.070656	0.00768466	0.00862807	0.0529899	0.0219707	0.211172	0.159525	0.205117	0.0456015
gene24069	LOC109428416	uncharacterized LOC109428416	0.964728	0	0	0	0	0	1.18964	0.483432	0	23.3459	11.8989	22.0681	3.15116	5.00594	23.8561	19.548	0	0	0	0	15.5795	23.9094	13.3454	0.720251	0.815566	1.36576	0.175319	0.537472	0.59609	1.37018	0.19739	0.195449	0.178217	0.737664	0.186271	0	0	0.36257	0	0	0	0	0	0	0	0	0
gene24096	LOC109428545	5-hydroxyisourate hydrolase-like	0.940149	0	0	0.0697355	0	0	26.2781	7.01438	0	30.2636	76.7896	96.081	170.79	136.738	103.116	114.625	3.84616	1.20921	3.00461	1.54762	194.694	186.968	77.4543	9.35868	7.77125	7.35201	4.32825	7.2165	5.50782	4.57808	2.47932	4.06334	2.77882	9.34531	3.22712	4.15431	3.5755	3.29777	1.82844	0	0.607812	0.243876	0	0.0721866	0	0	0.834399
gene24202	LOC109428593	endochitinase EP3	0.192946	0.101672	0	0	0	0	8.08954	2.61053	0.0957484	44.16	79.6547	37.3511	55.1356	58.7713	55.3203	94.9429	2.64237	0.372248	4.76049	0.420375	63.8211	136.62	92.3835	23.1921	22.6181	26.6386	14.1307	16.5778	12.7698	12.958	4.86923	6.22856	4.53883	31.7136	4.33416	4.05932	3.58391	8.54432	1.9072	0.0892777	0	0	0	0	0	0	0.385296
gene24204	LOC109428565	acidic endochitinase SP2	0.0621227	0.130941	0.0268152	0.0414715	0.0198421	0.0831913	14.2705	6.66184	0.215797	38.5997	103.812	107.173	199.165	221.795	165.348	222.105	3.09622	1.19853	5.20283	0.893298	295.421	431.623	144.373	10.8065	11.6589	12.1367	2.59658	4.15319	4.04318	3.95781	1.95745	3.7002	1.5837	5.27262	1.75123	2.06775	2.62084	2.98845	1.14778	0.229958	0	0.024172	0	0	0	0	0
gene2422	LOC109424474	protein croquemort-like	0.373607	0.605754	2.38179	25.2864	27.7735	1.05836	0.567024	1.1377	2.21055	0.0391813	0.141786	0.039248	0.11094	0.0235461	0.0768288	0.0627122	0.167754	0.582182	2.90532	0.388209	0.131043	0.11129	0.0795111	0.0214561	0.0121477	0.0116245	0.0208908	0.0426964	0.0236765	0.0233242	0.105844	0.0349342	0.106181	0.0329622	0.0887835	3.91326	6.39392	0.0648051	9.907	0.438827	14.142	36.1974	62.3626	0.198597	0.304688	0.314726	0.157821
gene24229	LOC109428607	protein G12-like	0.519166	0	0.0279076	2188.39	175.09	3.57057	2.14349	1.51947	0.976634	0.286472	0.364539	0.0441475	0.0779452	0.223185	0.621358	0.0673162	0.0580603	1.99077	0.15041	0.405682	0.0245669	0.17125	1.27761	3.47296	0.564605	0.777739	0.313473	0.476422	0.213057	0.1401	0.842393	0.253061	0.342542	0.259539	0.191245	0.297923	1.59127	0.17835	1.65034	2.14914	0	0.0100627	0	0.950746	12.5612	0.301569	0.411206
gene24230	LOC109428581	protein G12-like	0.26155	0	0.0484265	1211.72	185.91	2.86131	2.27256	0.990265	1.09335	0.906204	0.238165	0.0230744	0.0212727	0.0546339	0.309405	0.112504	0	0.0488959	0.128641	0.0117798	0.0770416	0.0827018	0.112189	1.95521	0	0.0382714	0.0122819	0.0376526	0.0556788	0.0274251	0.401017	0	0.0164802	0.0558112	0	0.0292147	0.138796	0.0167639	0.11501	0.297081	0	0.0105188	0	0.573514	10.5454	0.575654	0.215935
gene24231	LOC109428582	protein G12-like	0.276318	0	0.210999	1898.65	190.467	4.51428	1.30044	2.28643	1.39845	0.217505	0.179906	0	0.303189	0.180206	0.562972	0.119359	0.0573073	0.369351	0.0809779	0.159612	0.0727449	0.321254	0.74285	2.8481	0.0809219	0.0965373	0.197148	0.094807	0.131434	0.0258956	0.309189	0.0775711	0.0627157	0.113692	0.0409072	0.0275853	0.330178	0.176037	0.253183	0.432875	0	0	0	0.330738	2.52762	0.0647081	0.127433
gene24457	LOC109429014	general odorant-binding protein 45-like	0.291822	0	0	0	0	0	0.3907	4.70873	0.463409	0	0.102838	0	199.998	332.179	0	0.0545823	0.183445	0	0	0	0	0	0.0403686	0	0	0	0.0424259	0.260129	0	0	0	0.0472972	0.0431272	0	0	0	0	0	0.0567547	0	0.0485137	0	0	0	0	0	0
gene24458	LOC109428959	general odorant-binding protein 45-like	0.121484	0	0	0	0	0	0.321013	6.05722	0.482288	0.0414064	0.149838	0	184.049	323.914	0	0.056806	0.13637	0	0	0	0.0461616	0.047044	0.0840266	0	0	0.0491386	0	0.180484	0	0	0	0	0	0	0	0	0	0	0	0	0	0	0	0	0	0	0
gene24463	LOC109428858	uncharacterized LOC109428858	0	0	0	0	0	0	0.149116	13.0963	0.997637	0	0.0745738	0.289	399.684	608.335	0.141431	0.0989524	0	0	0	0	0	0	0.219553	0.0789953	0	0.171193	0	0.314392	0	0	0.0432985	0.17149	0	0	0	0	0	0.27836	0	0.195835	0.0439753	0	0	0	0	0	0
gene24477	LOC109428866	general odorant-binding protein 45-like	0	0	0	0.020275	0	0	76.7864	0.760957	0.753575	0.0414064	0.214054	0.0207384	34.2161	628.547	9.03259	9.4866	0	0	0.051386	0	0	0.070566	0.0420133	0	0	0.122846	0.0662316	0.360969	0.0500422	0	0	0.0738362	0	0.092891	0	0	0	0	0	0	0	0	0	0	0.0772778	0	0.0606484
gene24911	LOC109429337	tyramine receptor 1-like	0.635269	0.174653	0.190757	0.0860472	0.0411695	0.0739755	1.28025	0.618221	0.0456883	15.414	13.6679	18.2001	14.8232	9.67876	12.8438	14.2126	0.248038	0.133219	0.257026	0.128378	10.6795	3.74354	1.7321	0.735481	0.287981	0.350057	0.180699	0.116265	0.1517	0.186803	0.0904213	0.14922	0.129261	0.527987	0.0853279	0.278589	0.293145	0.0692031	0.223822	0.127802	0.10714	0.100307	0.0599616	0.0445358	0	0.201651	0.119504
gene24916	LOC109429340	chorion peroxidase	0.0531139	0	0.0229266	0.124101	0.056549	0.148182	16.2618	25.143	0.360219	281.789	333.304	574.286	791.137	223.487	219.944	274.129	1.42298	0.26472	2.75587	0.601746	89.6789	90.6705	67.6819	14.434	10.2301	13.8141	13.0306	10.8106	8.19726	6.74617	4.65128	4.39032	2.0147	18.4246	1.59299	2.47964	1.74047	4.33831	1.52365	0.114689	0.198672	0.0206667	0	0	0.0300324	0	0.468449
gene24917	LOC109429341	chorion peroxidase	0.131705	0.00991445	0.0324859	0.062802	0.0240382	0.056691	2.07486	5.38356	0.0653579	263.388	230.489	323.648	181.477	36.4726	61.1715	69.1973	0.430857	0.145198	0.64734	0.0983823	32.5126	20.3449	15.38	2.69702	1.13727	2.30594	0.74539	1.02027	0.449518	0.404655	0.554354	1.04444	0.549167	1.59691	0.196173	0.463591	0.404372	0.685902	0.210405	0.0957644	0.156394	0.0219628	0	0.0260037	0	0.0152627	0.309968
gene25547	LOC109429926	uncharacterized LOC109429926	0.778682	0	0	0.0385058	0	0	3.86119	1.91748	0	16.632	30.3339	32.0799	40.9068	45.8244	37.817	40.8524	0.517983	0.472947	0.317171	0.0502676	48.2838	17.5563	2.97221	0.882793	0.999618	0.6066	0.209643	0.321349	0.261357	0.327687	0.165225	0.210342	0.149176	0.441042	0.11137	0.249335	0.298438	0.368521	0.084134	0	0	0	0	0.0398592	0	0	0.0863867
gene2628	LOC109430692	uncharacterized LOC109427258	0.343721	1.11261	123.971	50.481	52.5244	62.6819	147.414	283.164	188.991	0.30125	0.13843	0.0502938	0	0	0.0492256	0	0	0	0.0415396	0	0	0	0	0.219957	0	0.0198614	0.0356937	0	0	0	0.0602809	0.019896	0.235844	0.26282	0	0	0	0	0	0.181763	0.0408154	0.019106	0	0.152694	0.0624701	0	0.196109
gene26577	LOC109431035	uncharacterized LOC109431035	0.00241608	0.0331017	22.17	10.2404	6.64129	4.03087	14.9938	10.369	16.508	0.00823493	0	0	0	0	0.00968848	0.00852592	0.00216971	0	0	0	0	0	0	0.0162343	0	0	0	0.00358948	0	0	0.0197739	0	0.00535596	0.0147794	0	0	0	0	0	0.0111794	0.0040166	0.0018802	0.00196692	0	0.0184429	0	0.311194
gene26665	LOC109431129	putative vitellogenin receptor	0.428498	0.00844092	0.0414866	0.040101	0.0153492	0.0187698	5.74814	3.77672	0.0397458	199.425	117.964	126.284	95.9154	46.0018	84.8564	73.6637	0.104292	0.108166	0.111798	0.0907403	62.9643	14.8936	5.15198	1.761	0.467195	0.622012	0.311481	0.410519	0.217748	0.143005	0.281867	0.318038	0.171631	0.346016	0.0278361	0.0830927	0.191263	0.225758	0.175239	0.0444717	0.116506	0.0280479	0.00652032	0.0083021	0.0339655	0.00974572	0.275895
gene26722	LOC109431198	histone H2A	0.0351437	0.0112235	0.0560821	0.0639846	0.0850378	0.0784375	1.73948	1.05131	0.219848	1.78077	18.2901	10.7348	19.614	23.1541	19.8172	20.1301	0.421756	0.32463	1.22435	0.276574	58.5539	41.9319	46.0211	9.00828	2.66219	3.18332	1.3199	1.60748	1.86089	1.45982	0.449742	0.779307	0.476094	2.58297	0.347916	0.62792	0.840081	0.81969	0.4132	0.22273	1.04456	0.427637	0.453429	0.0493072	0.252006	0.129584	0.109522
gene26723	LOC109431205	histone H4	0.117042	0	0	0.0209806	0.0394605	0.0210434	2.23137	1.36526	0.0268897	1.01578	22.8363	12.7281	23.9661	27.0054	26.8559	26.7172	1.00046	0.807057	4.07334	0.579896	82.9105	61.0353	55.8187	37.1632	16.3774	12.5044	7.17034	7.22992	7.03633	4.63428	1.66215	1.65019	0.993791	8.77461	0.727345	1.8776	1.59935	2.93983	0.991661	0.244707	0.404466	0.383728	0.29379	0.117577	0.268396	0.286593	0.0724976
gene26726	LOC109431199	histone H2A	0.0324518	0.0110325	0.235874	0.0978375	0	0.140186	1.881	0.951579	0.0519486	1.9046	18.6524	10.758	18.794	21.0778	16.4938	19.1146	0.308347	0.525108	1.19643	0.160565	62.111	35.8777	46.6895	7.38017	3.09388	3.71685	1.9861	1.58712	1.98962	1.67201	0.694831	1.08756	0.325659	1.93787	0.349271	0.579221	0.79995	0.856884	0.198503	0.414628	1.08682	0.921367	2.33764	0.0542551	0.632166	0.109546	0.104522
gene26727	LOC109623441	histone H3	0	0	0.0222617	0.0688583	0	0.0172661	3.61013	1.96413	0.0122847	1.33383	19.2903	12.0637	26.7101	48.4413	38.8168	46.1582	2.45466	0.941273	6.7146	0.556429	126.9	138.547	121.513	32.5844	10.1002	12.3729	3.89816	4.31605	4.51654	3.39539	2.54944	3.27665	1.74922	10.1781	1.11767	2.93921	1.65524	3.40049	1.23572	0.230044	0.167189	0.423822	0.269548	0	0.0831101	0	0.0113287
gene26729	LOC109431191	histone H4	0	0	0.0208724	0	0.013128	0.0202357	1.31437	0.496735	0	1.04326	14.4331	7.21948	16.0135	16.5014	17.0182	20.407	1.32552	0.644872	3.73888	0.388749	81.0895	49.3267	48.2325	32.1615	15.401	13.5171	6.27865	6.83189	6.4765	5.8729	2.35274	1.34701	1.14875	7.56854	0.908437	1.53424	1.47034	1.72008	0.578363	0.519083	0.429067	0.287869	0.229304	0.0977392	0.562894	0.0166709	0.0506944
gene26730	LOC109431219	histone H2A	0.137721	0.232672	0.100743	0.105274	0.130958	0.00703926	2.48094	1.99453	0.182597	1.67768	22.6422	13.1801	26.409	31.4035	25.7694	29.3584	1.61536	0.591243	2.39953	0.486504	78.8076	55.6171	66.6239	15.4466	4.31492	3.71743	1.52231	2.74579	2.76031	1.61004	0.987762	1.06409	0.704596	3.65758	0.780286	0.59533	0.996679	1.57095	0.741177	0.303544	0.699969	0.449153	0.416805	0.132948	0.156933	0.185062	0.537439
gene26734	LOC109623442	histone H2A	0.114937	0.0106255	0.183654	0.134612	0.2222	0.0742585	1.44148	1.27317	0.0750487	1.99929	18.7937	10.9842	21.1305	25.2858	19.4217	22.5073	1.01949	0.38903	1.6632	0.246902	60.9088	42.6736	50.2435	10.9205	3.0684	3.29674	1.21293	1.98019	1.80659	0.774891	0.198038	0.762298	0.663054	2.83236	0.40569	0.461103	0.955029	0.742674	0.890216	0.343353	0.995608	0.17575	0.187139	0.197171	0.0649894	0.350866	0.482192
gene26741	LOC109431221	histone H2A	0.0675724	0.23367	0.101175	0.0373564	0	0.0777642	0.977589	0.904723	0.209578	2.01379	14.6781	7.54185	16.128	20.1001	15.9523	18.889	0.726285	0.405359	1.48091	0.20335	52.0736	32.0169	39.7627	10.1007	2.94103	2.63583	0.925593	1.43369	1.01857	1.63494	0.561673	0.784596	0.241855	2.17733	0.181027	0.269276	0.719411	0.728532	0.166325	0.08012	0.407215	0.22513	0.250984	0.0364806	0.129847	0.0959258	0.210838
gene26743	LOC109431216	histone H1.4	0.235138	0.383168	0	0.0732097	0.081415	0	1.27539	1.37038	0.186306	0.675499	7.97358	5.70732	20.6088	27.5885	22.1529	28.6118	0.755918	0.251604	1.66825	0.201476	68.7331	35.9999	36.3863	11.0892	4.75072	4.76109	2.6278	2.8233	2.17484	1.60285	0.530433	1.03282	0.685512	2.81854	0.524208	0.804607	0.946075	1.20155	0.372762	0.127086	0.166709	0.0222965	0.0965164	0.0457428	0.105582	0.11621	0.342298
gene26745	LOC109431223	histone H2A	0.0402274	0.0467434	0.0276045	0.0482009	0.0678676	0.0227913	0.452084	1.35525	0	1.2354	12.7781	8.02577	16.4887	21.4924	14.8069	15.7273	0.385336	0.251736	1.267	0.121354	47.4723	31.9161	31.4888	7.79013	1.68381	1.88998	1.26565	0.591512	1.45651	1.16528	0.441509	0.280856	0.206552	1.68071	0.191988	0.51454	0.792316	0.25275	0.208629	0.135545	0.153471	0.0449508	0.104964	0.0320754	0.0708623	0	0.107107
gene26749	LOC109431220	histone H2A	0.0213918	0.0371986	0.0646364	0.0378436	0.049878	0.00716168	1.02275	0.571353	0	1.21397	13.147	7.86664	12.2609	17.4576	13.8958	21.2186	0.341945	0.298183	1.35545	0.206934	44.2058	30.8407	29.8257	6.76602	2.13756	2.25835	0.928336	0.948661	1.5729	1.29602	0.824611	0.615408	0.266349	2.01926	0.385776	0.53633	0.641101	0.531417	0.308907	0.0118778	0.322731	0.0940564	0.0609522	0.0103478	0.0299368	0.0104118	0.102522
gene26750	LOC109431192	histone H1.4	0.0905216	0.413025	0	0.047633	0.0850378	0	0.846475	0.943508	0.0623608	0.720149	5.26232	5.39722	18.2124	20.2282	16.2898	25.3648	0.455228	0.0246554	1.6577	0.160562	57.1441	32.9556	29.1191	6.8075	3.8992	4.26194	2.14203	2.86135	2.04425	1.11323	0.739112	1.14436	0.539835	2.14569	0.385751	0.449304	0.731574	0.637181	0.594428	0.0137975	0.385955	0	0	0.0566665	0.0541948	0.0647922	0.0988885
gene26752	LOC109431204	histone H2A	0.175339	0	0.0183479	0.0141881	0.0359781	0.0782681	1.78814	1.43244	0	1.31839	22.4695	15.7968	25.752	29.5213	22.8276	26.9843	0.957159	0.2901	1.31251	0.374143	72.2048	45.4889	41.5859	7.60917	2.77322	4.6628	1.28306	1.41061	1.41388	0.727038	0.955813	0.861156	0.464857	3.5687	0.25114	0.978432	0.541363	1.56555	0.246971	0.0472034	0.469918	0.355595	0.227522	0.102073	0.0712024	0.100857	0.199472
gene26800	LOC109431305	gametocyte-specific factor 1 homolog	0.0520647	0	0.0224737	0.0173785	0	0.0348611	7.44751	4.01785	0.103347	22.4837	39.0527	40.2266	75.4614	79.7262	68.2708	90.7598	0.911732	0.477128	2.18023	0.408365	118.127	200.911	160.827	5.48077	2.46482	2.67454	1.45709	1.70171	1.35114	1.47893	0.767003	1.28686	0.596319	1.47299	0.683586	1.14781	0.642376	1.17404	0.810061	0.361362	0	0	0.0211928	0.0359787	0	0	0.103969
gene27466	LOC109432010	gametocyte-specific factor 1 homolog	0.144851	0	0.0208417	0.0161165	0.0308439	0.0323295	9.20323	6.09722	0.0958424	31.3669	54.2952	60.1699	118.012	121.263	101.456	127.954	1.06232	1.0014	3.41069	0.294552	166.754	317.428	244.093	8.34509	4.40838	3.30058	1.94795	2.00853	1.92925	1.88095	1.10647	1.23253	0.963315	2.27054	0.969562	1.33579	0.980066	1.27024	0.962519	0.178731	0	0	0.0196537	0.0333659	0	0	0.385674
gene27712	LOC109432340	pyrethroid hydrolase Ces2a-like	0.468304	0	0.0252679	0	0	0	3.16583	0.718677	0.0871476	25.4786	34.0683	23.0937	23.3359	41.1503	35.8854	39.8723	0.538828	0.0705855	0.581875	0.178553	55.786	27.6781	14.5962	0.9287	1.68256	1.92973	0.765938	0.630514	0.651054	0.439455	0.467114	1.41128	0.594763	2.32752	0.339078	0.569347	0.594103	0.726002	0.32731	0.027086	0.024329	0.0227772	0	0	0	0	0.146119
gene27892	LOC109432435	cathepsin K-like	0.575933	0.130065	0.071029	0.0686569	0.0262792	0.0826348	0.101457	1.25749	0.163317	2.98656	3.50827	37.6272	44.7032	4.47151	1.16849	1.385	0	0	0	0	0.140685	0.127444	0.0853614	0.0383913	0.0260831	0.0442617	0.0299039	0.0458379	0.0508371	0.0166936	0.0168343	0.0400049	0.0759955	0.0157278	0	0.133371	0.130984	0	0.140012	0.0571049	0	0.0160069	0.0502353	0.198996	0.0872283	0.0166856	0.287522
gene27905	LOC109432540	uncharacterized LOC109432540	0.0352444	0	0	0.117641	0	0	8.84121	2.26063	0.0699594	53.4801	81.5501	61.922	57.9164	85.4731	90.4745	116.526	6.77318	0.917955	5.63516	1.19789	139.144	233.301	166.643	11.0251	9.80256	13.7426	8.6082	11.886	7.31705	5.72078	3.63447	5.56945	3.20331	12.3966	3.75638	5.75889	4.51679	6.67586	2.26198	0.0652315	0	0.109709	0.0573844	0	0.0298926	0	0.10557
gene28024	LOC109432593	uncharacterized LOC109432593	0.313537	1.51643	79.3635	47.2878	48.7525	38.9456	110.812	230.653	124.649	0.263053	0.0509953	0	0.128911	0.0790411	0.241785	0.0150369	0.151612	0.0232655	0.0408065	0.0630563	0.0549866	0.0186792	0	0.108038	0.0407783	0.175598	0.0175319	0	0.139088	0.0978701	0.0789561	0.0977243	0.309028	0.239741	0.204898	0.0208512	0.0959907	0.036257	0.0469061	0.0892777	0.120285	0.0750754	0.0196345	0.333332	0.225015	0.0391294	0.96324
gene28025	LOC109432606	uncharacterized LOC109432606	0.301848	2.46538	111.219	86.099	87.0109	106.27	226.362	525.091	268.308	0.411524	0.159556	0	0	0.0824355	0.100867	0.0940958	0.0225889	0.0970586	0.042559	0.0219214	0	0.0389628	0.0173981	0.0375591	0.0637943	0.0610464	0.0182848	0.0186851	0.165784	0	0.185281	0	0.18587	0.53854	0.155417	0.0217467	0	0.0567211	0.0244602	0.232779	0	0	0.0409553	0	0.0640031	0.0612147	2.88824
gene28105	LOC109432629	general odorant-binding protein 45-like	0.117594	0	0	0.0392512	0	0	3.1239	35.5292	0.754884	0.577157	0.533081	0.27301	1133.53	1235.22	0.241119	0.444879	0.147843	0	0.159169	0	0.208402	0.130419	0.341609	0.0438968	0.218706	0.380519	0.213701	0.902521	0	0	0	0.165051	0	0.0359664	0.0363283	0.0711653	0.0187209	0.0353558	0.0228701	0	0	0	0	0	0	0	0.0469649
gene28106	LOC109432647	general odorant-binding protein 45-like	0	0	0	0	0	0	1.12267	2.3816	0.0536023	0	0.0951614	0.0184392	95.6942	164.956	0.0360952	0.151524	0	0	0.045689	0	0	0.0627425	0	0	0	0.0218454	0	0	0	0	0	0	0	0	0	0	0	0	0	0	0	0	0	0	0	0	0
gene28107	LOC109432663	general odorant-binding protein 45-like	0.052286	0	0	0.0087262	0	0	11.9343	23.6243	1.12453	0.047404	0.29186	0.0178514	791.493	1454.96	0.122305	0.135936	0.0469542	0	0	0	0.0596029	0.0911133	0.192757	0.0292769	0.0221009	0.18315	0.212082	0.666877	0.0215378	0.0424347	0	0.169486	0.0193179	0	0	0.0113009	0	0	0	0	0	0	0	0	0	0	0
gene28361	LOC109621375	heat shock protein 67B2-like	0.217704	0	0	0.0581335	0	0	172.642	0.0436372	1.68534	18.0459	0.0920623	0.0594624	0.129291	1083.2	1.01849	0.461486	0	0	0	0	0	0.202331	0.0801078	0	0.0368087	0.140893	0.0633009	0.388121	0	0	0	0	0	0.0998784	0	0	0	0	0	0	0	0	0	0.0902652	0.110788	0	0
gene28362	LOC109621376	heat shock protein 67B2-like	0.173856	0	0	0.0870462	0	0.0291022	211.049	0	1.3804	0.118513	0.122533	0	0.283938	1477.36	0.261435	0.16259	0.0390317	0	0.0735383	0.0757567	0.0330308	0	0.180375	0	0	0.316449	0.0947837	0.87173	0.0358076	0	0	0.140889	0	0.299106	0.0671367	0.0375764	0	0	0	0.0402223	0.0722562	0.0676475	0	0.0300352	0	0.105774	0.0867937
gene28381	LOC109621360	chymotrypsinogen B-like	0.18851	0.417205	1.48094	7.55067	5.80431	28.8332	45.8939	17.4316	43.0254	0.0257005	0.146147	0	0.0111953	0	0.0125987	0	0	0	0.0159474	0	0	0	0	0	0.0318727	0.0152499	0.0137031	0	0.0621213	0	0	0.0152765	0.0417888	0.0576565	0	0.032595	0	0.0141694	0	0	0	0.0146699	0.122772	0.0130268	0	0.168211	0.131754
gene28389	LOC109621398	elongation of very long chain fatty acids protein AAEL008004-like	0.35775	0.377029	0.290678	0.154534	0.0537724	0.394536	0.326231	2.97379	0.0626583	0.688572	8.61729	68.4858	90.584	0.0919555	0.210967	0.288646	1.17169	3.81642	3.73856	8.51587	0.047978	0	0.0727775	0.0471336	0.0889518	0.0510722	0.0305946	0	0.0173371	1.04183	0.826709	0.682148	1.46171	0.0482731	0.796394	34.4768	38.3491	0.601078	42.0121	1.73324	9.27093	15.0173	1.88451	0.654403	1.01737	0.614556	0.50428
gene28391	LOC109621362	uncharacterized LOC109621362	0.22021	0.0331538	19.3094	8.29536	6.71203	8.21487	23.3864	20.9032	38.341	0.278779	0.0221719	0	0.0373655	0.0687314	0.0420495	0	0	0	0	0	0	0	0.0217588	0.117432	0	0	0	0	0	0	0	0	0.069737	0.0721628	0	0	0	0.0472917	0	0	0	0	0	0	0	0.30623	2.88972
gene28396	LOC109621387	uncharacterized LOC109621387%2C transcript variant X2	0.38522	0.541306	7.41794	23.1804	7.19102	8.87002	7.39685	36.827	14.8895	0.401187	0.399711	0.138827	0.0444843	0.0759813	0.0929698	0.0200143	0.192188	0.547079	0.27157	0.111905	0.016264	0.0165749	0.0148024	0.175755	0.0452304	0.0779079	0.0700055	0.0397435	0.0705248	0.0868443	0.0963341	0.251473	0.110698	0.188186	0.0826432	0.240528	0.0766589	0.176948	0.0624326	0.0297074	0.0266836	0.0249816	0.0609787	0.044367	0.0544541	0.147565	0.683779
gene28471	LOC109433015	uncharacterized LOC109433015	0.0802629	0	0	0.0535815	0.0512724	0	3.4217	1.26023	0.0398301	9.01856	12.6588	15.8527	21.3826	37.9009	39.5984	39.3045	1.04513	0.193563	1.16562	0.139897	50.3526	60.41	37.9986	3.12598	2.3597	3.32227	1.26413	1.54023	1.55767	1.28109	0.602153	1.26834	0.741359	2.16847	0.60956	0.45104	0.702783	0.814451	0.286181	0.0495178	0	0	0	0.073953	0	0	0.053426
gene28472	LOC109433010	uncharacterized LOC109433010%2C transcript variant X1	0.102609	0	0.0110728	0.00856242	0.00819342	0.0257641	4.71779	2.57091	0.0763791	19.55	35.6396	44.2286	53.3425	78.5179	67.4841	59.1514	2.64919	0.556771	2.92964	0.201202	92.4634	102.769	85.3963	7.19143	5.30224	7.67823	3.20729	3.4776	4.53315	2.14437	1.62708	3.3053	1.48799	5.61959	1.52552	1.82965	1.73564	2.04385	0.436535	0.130565	0	0	0	0	0	0	0.153676
gene28537	LOC109433138	uncharacterized LOC109433138%2C transcript variant X3	0.410498	0	0.0759392	0.0195742	0.0093653	0.0294491	3.72934	1.9101	0.0436517	14.0513	23.7137	37.3137	50.2815	34.5641	31.4718	39.8765	2.97544	0.466697	5.0478	0.626054	63.4174	77.8615	244.093	44.6573	7.01494	9.07292	3.84719	5.28183	4.67423	2.85561	2.47173	3.84934	1.40832	7.23047	1.77768	1.77447	2.20561	2.72187	0.940917	0.208121	0.146235	0	0	0.0101311	0	0.0237854	0.117104
gene28708	LOC109433274	protein croquemort-like%2C transcript variant X2	0.508101	0.62473	2.51002	34.6356	29.9183	1.30414	0.497267	2.07934	1.86306	0.0769689	0.0994745	0.019275	0.0922026	0.0231274	0.0943279	0.079196	0.19012	0.898586	3.76108	0.528906	0.0858081	0.0655863	0.0976212	0.0421489	0.0357951	0.0114178	0.0615577	0.0629055	0.0465108	0.0458187	0.173269	0.0343128	0.166867	0.010792	0.130807	4.6246	7.44861	0.0636525	13.2992	0.640003	19.5686	47.8551	82.2113	0.214572	0.371093	0.400723	0.211382
gene28720	LOC109433251	uncharacterized LOC109433251%2C transcript variant X1	0.387645	0.70708	24.9016	10.6698	12.4514	12.9046	21.7718	30.0642	28.1152	0.203268	0.525406	0.539576	0.0619815	0.138442	0.17936	0.185911	0.508785	0.129441	0.151355	0.0649671	0.0906445	0.254038	0.257809	1.07972	1.97886	0.679533	0.986248	0.708812	1.33886	0.851136	0.618169	0.934444	0.539835	0.752417	0.879052	0.386696	0.522189	0.728436	0.463944	0.206962	0.198289	0.146888	0.20634	0.401817	0.214973	0.217702	0.372161
gene2875	LOC109429333	uncharacterized LOC109429333	0.251926	0	0.042021	1832.15	435.421	8.72195	1.19814	2.14841	1.58018	0.0336289	0.341437	0.00651264	0.162701	0	0.675678	0.129796	0.0245138	0	0	0	0	0	0	2.33189	0	0	0	0	0.00894136	0	0.735638	0.0266521	0	0	0	0	0.0130896	0	0.0479721	0.325356	0.183982	0.0575863	0.0321291	0.637952	7.26733	0.0344161	0.0531971
gene28759	LOC109433302	general odorant-binding protein 45-like	0	0	0	0	0	0	0.35865	8.07664	0.196449	0	0.0398584	0.0386164	239.351	155.854	0.0377962	0	0.279324	0	0	0	0	0	0.0782316	0	0.047809	0.0228749	0.0822185	0.0420093	0	0	0	0	0	0.0216212	0.0218387	0.0733388	0.0675245	0	0.0274967	0	0	0	0	0	0	0	0
gene2876	LOC109429251	protein G12-like	0.620454	0	0.0290844	1592.19	528.5	6.7819	1.13504	1.56793	1.33747	0	0.267125	0.0546358	0.142556	0	0.44	0.0437593	0	0	0	0	0	0	0	1.53638	0	0	0	0	0.00982996	0	0.86337	0	0	0	0	0	0.0279345	0	0	0.454017	0	0	0	0.649926	4.83675	0.0603519	0.126843
gene2877	LOC109429235	protein G12-like%2C transcript variant X2	0.270835	0	0.0135379	1657.25	343.851	5.83581	1.09879	1.53693	1.30639	0	0.176147	0.00312316	0.0324018	0	0.578177	0.142581	0.0196569	0.0315151	0	0.0142358	0	0	0	2.01079	0.0138094	0	0	0	0.00457557	0	0.404815	0	0	0	0	0	0	0	0.0158845	0.505806	0.152889	0.195764	0.136174	2.026	6.10461	0.0466435	0.0427318
gene2878	LOC109429262	protein G12-like	0.188035	0	0	1770.35	311.47	5.37103	0.567175	1.27893	1.44798	0.0167189	0.200623	0	0	0	0.477842	0.0847971	0	0	0	0	0	0	0.025703	2.6057	0	0	0	0	0	0	0.615572	0	0	0	0	0	0	0	0	0.297813	0	0	0	0.0169486	1.21282	0	0
gene28868	LOC109433412	uncharacterized LOC109433412	0.31284	0	0	0	0.0363352	0.238033	0.210422	11.6862	0	0.82394	253.395	2678.45	382.327	1.30486	0.085533	0.106388	0.617298	0.233193	0.108267	0.210674	0.0432264	0.0550659	0.658977	0	0	0.0345106	0.444479	0.0528152	0	0.0230815	0.0465522	0.115236	0.0420303	0	0.0768773	0.0983504	0.0905531	0.0427539	0.0829669	0.0131594	0	0.0331981	0.0347292	0.108092	0.0603035	0.046141	0
gene28883	LOC109433416	peroxidase skpo-1	0.33274	0.0467562	0	0.00740429	0	0.00742645	3.60293	0.778111	0.0990724	0.385595	0.125074	0.0605884	21.5394	71.9224	0.600428	0.242027	0.0697221	0	0.0187659	0.00966598	0.0252869	0.0687207	0.092058	0.190454	0.0843879	0.143561	0.0725621	0.0906287	0.0639628	0.0990174	0.272324	0.125834	0.163915	0.0763273	0.26555	0.239723	0.114773	0.1584	0.172567	0.0615847	0.00921935	0.0258939	0.0632056	0.0153291	0.0470356	0.00899729	0.0110742
gene28884	LOC109433410	chorion peroxidase	0.583248	0.0109764	0	0.00695289	0.00665325	0.0069737	15.7935	0.668044	0.330782	0.930067	1.23321	0.903202	23.3087	210.515	2.83304	2.2987	0.112237	0.0301408	0.0352436	0.00907669	0.625292	0.9841	1.02294	0.124413	0.211315	0.244341	0.40883	0.657618	0.531989	0.532526	0.519967	0.43045	0.338627	0.509681	0.587204	0.360174	0.323329	0.320971	0.0506395	0.0481918	0.0259719	0.0162102	0.0423945	0.115156	0.0618353	0.0591414	0
gene28900	LOC109621441	uncharacterized LOC109621441	0.151272	0	0.0326482	0	0	0.0253219	0.266483	3.90387	0	0	0.0533079	0	140.978	4.73032	0.025275	0.0471564	0.0339615	0.291847	0.191957	0.16479	0.0287401	0	0	0.0847029	1.40671	0.520091	0	0.0280923	0.124625	0.12277	0.0309513	0	0.0279448	0.0289169	0	0.196172	0.240825	0.0284259	0.0735499	0.13999	0.817312	0.20601	0.431023	0.0261337	0.0320754	0.429491	0.302077
gene28902	LOC109621440	glucose dehydrogenase [FAD%2C quinone]-like	0	0	0	0	0	0	1.8463	0.0972584	0.0481575	0	0	0	3.28507	24.873	0.0162143	0.0453776	0.0653608	0	0.020524	0.0211431	0	0.0187898	0	0.0362256	0.225608	0.176637	0	0.0180217	0	0	0	0	0.0179271	0	0.0374747	0.0209746	0.0579352	0	0.0235918	0	0.0806648	0	0	0	0	0.649455	0.218011
gene29224	LOC109397020	glutactin-like	0.223134	0	0	0	0	0.0186756	3.25272	0.768722	0.0553647	21.9602	27.2559	20.5406	19.836	34.2552	29.9095	34.927	0.788999	0.0134529	0.365732	0.0729222	48.5615	24.0212	11.8259	0.864179	1.30865	2.06457	0.689349	0.932349	0.551485	0.645144	0.5821	1.02843	0.401897	1.64218	0.344665	0.663126	0.34413	0.607983	0.257664	0	0.0463685	0	0	0	0	0	0.0278488
gene29323	LOC109397039	general odorant-binding protein 45-like	0	0	0	0	0	0	8.9264	0.039135	0.0664377	0	0.0275213	0.0201882	3.86186	104.476	0.689717	0.430219	0	0	0	0	0	0	0	0	0	0	0.0133815	0.0103594	0	0	0	0.0226029	0	0.021327	0.0215416	0	0	0	0	0	0	0	0	0	0.0118282	0	0
gene29324	LOC109397040	general odorant-binding protein 45-like	0	0	0	0	0	0	4.90556	0.00939239	0.0465064	0	0.00660511	0.0169581	2.28332	34.5118	0.34198	0.0943629	0	0	0	0	0	0	0	0	0	0	0.0453024	0.00870193	0	0	0	0.0189864	0	0.0179147	0.0180949	0	0	0	0	0	0	0	0	0	0	0	0
gene29334	LOC109397073	general odorant-binding protein 45	0.119769	0	0.0103397	0	0	0	36.8455	0.87769	0.314767	0	0.0405182	0.0065426	17.2761	218.125	0.406631	0.265832	0	0	0	0	0	0	0	0	0	0.0387559	0	0.124555	0	0	0	0	0	0.0183159	0	0	0	0	0	0	0	0	0	0	0.0101582	0	0
gene29375	LOC109397195	uncharacterized LOC109397195	0.119536	1.85591	108.947	64.5577	66.6526	56.8006	161.055	343.717	170.35	0.407425	0.0842488	0.0326494	0.0993872	0.0522332	0.143802	0.0447161	0.150285	0.023062	0	0.104175	0.0545056	0.0555476	0	0.0356976	0.0404216	0.0967013	0.0868927	0.0355181	0.177263	0.0970141	0.0391328	0.0581217	0.270994	0.274205	0.166178	0.144682	0.133212	0.0718797	0.185983	0.0884968	0	0.0744188	0.0583882	0.264333	0.101385	0.116361	0.907074
gene29376	LOC109397175	uncharacterized LOC109397175	0.10176	2.72561	106.1	76.9789	89.9401	102.346	231.972	480.514	263.853	0.450889	0.0537903	0.0347428	0	0.0277911	0.0340049	0.0951662	0.0685376	0.196325	0	0.0221708	0	0	0.017596	0.0759727	0.06452	0.0617408	0.0184928	0.0188977	0.0419174	0	0.0624627	0	0.288369	0.350142	0.0392961	0.0219941	0	0.0573663	0.0247385	0.470854	0.0422927	0	0.165685	0.0351602	0.194194	0.061911	2.41308
gene29377	LOC109397176	uncharacterized LOC109397176	0.764552	0.236986	10.6771	5.28409	5.20002	5.81183	11.1551	25.1508	16.8724	0	0	0.0307096	0	0	0	0	0	0	0	0	0	0	0	0	0.07604	0	0.065384	0.0668155	0	0.073	0	0.0364456	0.265859	0	0	0.116645	0.0715982	0	0.0437333	0	0	0	0	0.062157	0	0	0.269425
gene29483	LOC109397330	uncharacterized LOC109397330	0.231444	0	0	0.0128755	0	0.00645703	0.11552	31.1401	0.00957109	0.0920323	0.312649	0.243642	1097.71	1.69956	0.174017	0.0781612	0.0259803	0.0186051	0.163162	0	0.0146573	0.156844	0.0733709	0.0143994	0.00815246	0.0780131	0.09113	0.0716348	0	0	0	0.101593	0.00712588	0	0.0223438	0.0416861	0.00767625	0.0217457	0.00937754	0	0.0881747	0.0675414	0	0	0.0654332	0	0.0192573
gene29484	LOC109397322	uncharacterized LOC109397322	0.174163	0	0	0	0	0	0.33749	33.1643	0	0.178084	0.644436	0.50543	1197.6	8.01463	1.13489	1.62877	0.312807	0.0840029	0	0	0.0992678	0	0.0602314	0.0650138	0	0.0704465	0.0633009	0.0646869	0	0	0	0.282276	0	0	0.0336277	0	0.0693172	0	0	0.0805869	0	0	0.0354463	0	0	0	0
gene29485	LOC109397323	uncharacterized LOC109397323	0.146258	0	0	0.0195276	0	0.0783442	3.9369	9.08806	0.0290319	0.11964	0.247397	0.679116	336.167	41.9087	26.9787	32.3348	0.131343	0	0.0494919	0	0	0.022655	0.121394	0.0655163	0.173102	0.118318	0.0850536	0.130374	0	0.0237402	0	0.0711145	0.0864595	0.0671002	0	0	0.0698529	0.043974	0	0	0	0.0227636	0.0714405	0.0606419	0.148859	0	0.0292064
gene29486	LOC109397329	uncharacterized LOC109397329	0	0	0	0.0243661	0	0.048878	4.91236	32.849	0.0362253	0.0746422	0.282971	0.299076	1058.46	186.244	0.609842	0.477878	0	0	0.154387	0	0	0.0282683	46.3505	0.299748	0.524552	0.620065	0.106128	0.108451	0.300698	0.0296224	0.119489	0.236626	0.107882	0.279086	0.0563789	0.0631106	0	0.137174	0.0709855	0.135109	0	0	0	0	0.061914	0	0.0728861
gene29487	LOC109397326	uncharacterized LOC109397326	0.100719	0	0	0	0	0	2.64368	4.69379	0.174934	0.0858219	0.408171	2.71659	179.73	70.8709	4.17344	4.22295	0.11306	0.048579	0.0426025	0	0.0382711	0	0.452815	0.526366	0	0.0407393	0	0.0935212	0.0414884	0	0.0618234	0	0.0372121	0.0385065	0.0388939	0	0	0	0.0979411	0	0.0837196	0	0	0	0	0	0
gene29488	LOC109397333	platelet glycoprotein Ib alpha chain	0.0419805	0	0	0	0	0	0.946606	5.63784	0.333322	0	0.177526	0.0286658	168.529	321.127	0.36474	0.209387	0	0	0	0	0	0.0325133	0.145182	0	0	0	0	0.187106	0	0	0	0.0340201	0	0	0	0	0	0	0.0408227	0	0	0	0	0	0	0	0
gene29489	LOC109397338	alpha carbonic anhydrase 8-like	0.0524532	0	0	0	0	0	0.147844	0.735971	0.208237	0.0715122	0	0	31.193	69.0948	0	0	0	0	0	0	0	0	0	0	0	0.0848662	0	0	0	0	0	0.042507	0	0	0	0	0	0	0	0	0	0	0	0	0	0	0
gene29551	LOC109397403	trypsin-1-like	0	0.150734	74.6035	42.6609	1.37049	5.746	60.5304	269.141	162.678	0.0779982	0	0	0	0	0.0191178	0	0	0.055188	0	0	0	0	0.0197853	0.0640688	0	0	0	0.0212489	0	0.0232157	0	0	0	0.0656178	0	0	0	0	0	0.158831	0	0.0445215	0	0	0.0242616	0.139228	0.0571224
gene29552	LOC109397399	trypsin 5G1-like	0	0	22.6774	258.172	33.868	3.54171	2.73471	125.288	89.0388	0.0115895	0.0181554	0	0	0.0140702	0.0516482	0.0160603	0	0	0.010896	0	0.0391527	0.0199506	0	0.237321	0	0.0554314	0	0	0.0424441	0	0.147578	0	0.0125629	0.0393936	0	0	0.0410096	0	0	0.119193	0.117766	0	0	0.017801	0	0.125378	0.0514401
gene29553	LOC109397402	trypsin-1-like	0.319807	0	0.169901	21.2346	2.15295	0.197662	0.312025	2.4655	1.02547	0.0335392	0	0.0167981	0	0	0.0328827	0	0	0.0711925	0.249736	0.0643174	0	0	0	0	0	0	0	0	0	0.039931	0	0	0	0	0	0.0212683	0	0	0.0717663	0.0910632	0.0204485	0.0765769	0.240326	0.136	0.563355	0	0
gene29554	LOC109397404	trypsin-1-like	0	0	27.5501	198.436	30.0013	2.44058	1.63839	176.085	104.579	0.0687321	0.097779	0	0.0225114	0	0.126667	0	0	0	0.0160334	0	0	0	0	0.254696	0	0.0202384	0	0	0.0312281	0	0.0775571	0	0.0184862	0	0	0	0	0.0188045	0	0.175391	0.0787693	0	0	0.0523881	0.064299	0	0.264928
gene29555	LOC109397396	trypsin 5G1-like	0	0	12.8167	141.805	34.1404	1.85915	1.5123	82.9801	49.2263	0	0.0313869	0	0	0	0.035859	0.0334517	0.0240916	0	0.0113475	0.0467593	0.0203876	0	0.0185555	0.0733054	0.0453586	0	0	0	0	0	0.0329343	0	0.0130835	0	0	0	0	0.0133087	0	0	0.0334491	0	0	0	0.0227536	0	0.0267858
gene29556	LOC109397398	trypsin 5G1-like	0.0283091	0	0.146635	83.4743	18.3191	3.2413	1.43625	1.5037	1.09576	0.0385952	0	0.0193304	0	0	0.0189198	0	0.0508446	0.0546164	0	0	0.0645412	0	0	0.0634053	0.143592	0.0916047	0	0.0420577	0	0.0459505	0	0	0	0	0	0	0	0	0	0.0261977	0	0	0.0460924	0.0391253	0.0480208	0.206679	0
gene29557	LOC109397395	trypsin 5G1-like	0.0262827	0	0.544555	635.086	667.719	6.11817	2.34574	0.684862	0.956287	0	0.0740958	0.0358934	0.0156089	0	0.0878277	0.158292	0	0	0	0	0	0	0	0.765267	0	0	0	0.0390471	0	0	1.0325	0	0.0194211	0.0200966	0	0	0.0418421	0	0	0.510771	0	0	0	0	0.0668751	0.0213205	0
gene29558	LOC109397401	trypsin 5G1-like	0	0	0.27484	637.226	354.199	3.36385	1.87277	0.501857	1.15603	0	0.0769741	0	0	0	0.289047	0.0909022	0.0407022	0	0.0309514	0	0	0	0.018885	0.893655	0.0152342	0	0	0.020282	0	0	0.528708	0	0	0	0	0	0.0217337	0	0	0.412867	0	0	0	0	0.231576	0.103213	0.0452541
gene29559	LOC109397400	trypsin 5G1-like	0.0557204	0	0.328546	665.976	490.927	5.10498	2.23133	1.34974	1.69611	0	0	0	0	0	0.214129	0.0462039	0.11659	0	0.0315823	0.0485598	0	0	0.0385399	0.814528	0.0155447	0	0	0	0	0	0.934866	0	0	0.0426057	0	0	0	0	0.0541837	0.232041	0	0	0	0	0.212667	0.0149161	0.0183594
gene29665	LOC109397517	uncharacterized LOC109397517	0.0187219	0	0	0	0	0	0.758559	3.08657	0.232266	0.0127623	0.0725732	0.00639198	103.07	242.546	0.1001	0.0175087	0.0168128	0.00903	0.00791907	0.00815797	0.00711394	0.0217498	0.0323732	0	0	0.0530091	0.0136092	0.104304	0	0	0.0153225	0.00758591	0	0	0.0144594	0	0.0149027	0	0	0	0	0	0	0	0	0	0
gene29666	LOC109397516	uncharacterized LOC109397516	0	0	0	0	0	0	0.125895	5.42686	0.0545605	0	0.0484313	0	202.132	138.181	0.082666	0.0085685	0.0123419	0	0	0	0	0.0212881	0.0665406	0	0	0.0111179	0.0899121	0.112299	0	0	0	0	0.0101554	0	0.0106143	0	0	0	0	0	0	0	0	0	0	0	0
gene29786	LOC109397669	leucine-rich repeat-containing protein 15-like%2C transcript variant X2	0.142842	0.417319	1.801	21.514	21.2904	1.96869	0.867657	1.46923	0.267388	0.00273901	0.321139	0	0.0238627	0.0205204	0.026854	0	0.0586353	0.0306204	0.109453	0.0393941	0	0	0.0208437	0.0977942	1.72201	0.71332	0.21351	0.196396	0.31613	0.124897	0.128745	0.102406	0.174433	0.192022	0.179058	0.407823	0.400438	0.033675	0.295778	0.683811	0.529708	1.57125	1.08109	0.0484523	0.266159	0.795143	0.546215
gene29827	LOC109397722	uncharacterized LOC109397722	0.116177	0	0	0.0969464	0.0185537	0.0388946	4.2774	1.16435	0.0720656	7.90963	12.0401	15.3454	21.5483	39.8205	37.2875	38.8542	0.612941	0.126079	0.896828	0.227807	47.1469	60.5906	34.5245	2.37441	2.0544	2.85477	1.29844	1.52104	1.53929	0.895737	0.64181	0.98855	0.697508	2.08758	0.661736	0.439427	0.439268	0.87325	0.282433	0.0537563	0	0	0	0.0401415	0.024634	0	0.0579991
gene29836	LOC109397681	uncharacterized LOC109397681	0.697628	0.0773919	0	0.0245115	0	0.0491698	1.31951	1.03036	0	15.7935	27.3533	15.6198	22.2856	11.271	10.9936	15.475	0.164865	0	0.621234	0.447982	17.7467	20.56	7.56803	1.69958	1.17953	1.03961	0.533806	0.600043	0.574738	0.536387	0.360606	0.327304	0.461236	1.09494	0.680585	0.285693	0.438405	0.441578	0.357046	0.0679576	0	0.114294	0.0298913	0.025373	0	0	0.183303
gene29999	LOC109397916	proton-coupled amino acid transporter-like protein CG1139	0.93242	0.0269224	0.0551341	0	0.0326376	0.00855237	3.62715	2.00978	0.0507079	17.5358	21.2004	19.5891	29.5233	40.1994	39.2851	38.4608	29.5707	0.480531	7.90247	1.54727	64.3696	12.8602	0.848119	2.45076	2.58072	3.17219	1.57842	1.80274	1.02072	4.35385	4.3801	5.20648	3.33171	2.32445	3.04823	1.60119	1.15907	5.0596	0.757658	1.01654	1.1785	1.16297	0	0.326582	0.325	0.0207227	0.0637659
gene30677	LOC109398661	histone H1-beta%2C late embryonic	0.259181	0.0532638	0.0932294	0.0720927	0	0.0144617	2.32641	1.42865	0	3.15074	18.977	11.0381	30.6362	50.7229	54.6595	120.326	2.58936	0.888812	9.77347	1.39552	210.646	169.423	143.108	45.1107	32.0072	44.5974	19.049	23.6456	22.2803	13.2519	5.64878	7.67921	3.9395	31.043	3.62879	6.58327	5.13433	9.25462	1.91839	0.233055	0.125671	0.0168079	0	0.0597013	0.0183187	0.122644	0.150956
gene30678	LOC109398658	histone H2A	0.15636	0	0	0	0	0.034898	1.72613	0.679058	0.103457	0.485324	5.58355	3.35108	9.1572	22.1813	15.5649	50.9248	1.31054	0.419312	6.15786	0.538704	156.006	95.6613	58.9713	34.4113	24.3368	31.6791	10.9621	15.0862	15.2003	5.66817	2.81532	2.73103	1.27093	17.7878	1.26799	3.22899	2.15071	4.23727	0.844369	0.0964653	0.0866463	0	0	0	0	0	0
gene30680	LOC109398607	histone H2A	0	0	0	0.0353177	0	0.0354234	0.521906	0.0880158	0	0.276248	11.6611	5.1601	12.2378	12.1609	12.5223	27.6242	0.871326	0.459306	3.92685	0.537592	121.396	77.7683	44.8584	14.6797	8.34829	12.0836	3.52497	4.54533	5.39322	1.97508	1.01059	1.40022	1.00312	6.43195	0.892372	1.76824	1.21451	1.84911	0.291181	0.0979175	0	0	0	0	0	0	0
gene30736	LOC109398681	uncharacterized LOC109398681	0.518871	0	0.0263494	0.0611267	0	0	3.67427	2.41656	0	20.2929	81.8734	47.442	35.2135	26.0794	40.6069	52.7618	4.85146	1.38381	4.64769	1.54277	80.7661	130.36	83.0291	7.1474	7.7666	8.93822	3.3502	4.57985	5.02905	6.06892	2.07333	5.16945	2.43578	7.93492	3.2059	3.00817	3.37706	6.24016	1.42464	0.141227	0.202963	0	0	0	0.0258871	0	0.0914241
gene30737	LOC109398731	uncharacterized LOC109398731%2C transcript variant X2	0.111694	0	0	0.037282	0	0.0186968	4.25006	2.6586	0	52.0726	106.858	71.3427	71.4244	50.5856	59.215	65.668	4.99013	1.02358	6.77963	1.8738	119.791	157.995	111.035	11.1324	9.65487	10.9784	4.58734	5.55896	6.07322	4.21519	1.85112	5.79291	1.93955	11.9353	3.12708	3.6453	3.55634	5.41509	1.87358	0.335931	0.0232106	0.0217301	0	0	0	0	0.390325
gene30738	LOC109398682	uncharacterized LOC109398682	0.143583	0	0	0.0958524	0.0305739	0	16.2555	6.66741	0	77.0293	231.269	134.124	114.065	69.956	126.573	146.752	13.6248	5.90962	19.4347	4.54643	259.481	364.302	335.574	45.5587	32.2069	30.5873	12.3508	17.7763	17.5858	19.1498	6.54153	12.4502	6.36588	39.6336	8.05823	9.1859	9.98154	14.8216	4.70065	1.32874	0.437614	0.148982	0.0779267	0	0.0811868	0.0388249	0.143362
gene30739	LOC109398685	uncharacterized LOC109398685	0.112075	0	0	0.0748188	0	0.112564	8.05532	5.27921	0	33.0044	96.0919	62.5242	73.3491	62.3795	91.4948	103.625	8.15239	2.4866	6.73168	2.78367	154.759	281.93	218.448	14.5592	12.8856	15.0505	6.88416	9.78224	10.3413	10.4603	2.38487	7.62918	3.80954	15.9396	3.3758	6.20123	5.93262	8.84538	3.10606	0.103717	0.372638	0.0872175	0	0	0.142586	0	0.167854
gene30740	LOC109398684	uncharacterized LOC109398684%2C transcript variant X2	0.201644	0.0531276	0	0.0673062	0.128811	0.135015	9.02258	3.23344	0.350227	22.7833	90.3516	63.9568	42.8119	35.7402	44.641	55.2217	4.21015	1.50749	5.84252	1.31798	71.9085	146.137	122.873	12.0059	9.84445	10.4399	8.09844	8.50043	6.81107	6.79155	3.50691	7.2308	4.17203	13.414	3.2315	3.92243	4.01273	6.63102	2.5981	0.37321	0	0.31384	0	0.0348359	0	0	0.100666
gene30794	LOC109398817	general odorant-binding protein 99b	0.0365536	0	0	0	0	0.0489506	18.2878	0.586152	0.0725582	0	0	0	18.4089	128.58	0.0977198	0.250689	0	0	0	0	0	0	0.0505658	0	0	0.0295708	0.0265714	0.0814594	0	0.0296664	0	0.0296222	0.0270106	0.0279501	0	0	0	0.0824267	0.0355455	0	0	0.0568922	0.029758	0	0	0	0
gene30795	LOC109398816	general odorant-binding protein 99b	0.180697	0	0	0	0	0	16.4071	0.103484	0.10248	0.0879832	0.072774	0.0528797	4.16988	119.763	0.138018	0.16094	0	0	0	0.0449929	0	0.0599774	0.0357091	0.0192722	0	0.0626478	0	0.134227	0	0	0	0.0627569	0	0.0986906	0	0.0446344	0	0.038806	0.0251019	0	0	0	0	0	0	0	0
gene31016	LOC109399009	chorion peroxidase	0.096284	0.0101473	0.0332488	0.0899875	0.0123014	0.0580223	1.47226	4.04323	0.0286683	194.64	182.582	249.171	138.789	28.0888	46.587	52.449	0.285336	0.148608	0.404497	0.0503463	22.6126	12.2345	10.1516	2.05589	0.700014	1.61234	0.608915	0.772445	0.428345	0.3829	0.520091	0.624212	0.320163	0.986535	0.171034	0.324643	0.306569	0.383572	0.102991	0.0445515	0.128053	0.0224785	0.0156768	0.0266144	0	0	0.16343
gene31017	LOC109399008	chorion peroxidase	0.0709717	0.0373982	0.0536111	0.408643	0.147346	0.279184	49.1411	49.7012	0.766022	844.34	926.189	1227.89	1525.01	731.204	546.804	639.628	3.9117	0.556258	4.33788	1.09786	210.581	207.231	155.102	32.9906	23.4969	31.6279	28.4714	23.434	17.4678	13.9031	9.23556	9.87802	5.4672	33.9035	3.25454	4.111	4.21584	9.17551	2.90723	0.311973	0.597306	0.0897494	0.072222	0.0122611	0.12039	0	1.95757
gene31020	LOC109398992	alpha-1D adrenergic receptor-like	0.342467	0.168431	0.0492753	0.0152415	0.00729233	0.0611485	0.729265	0.240258	0.0339896	8.5132	6.76367	9.8918	7.79648	4.84068	6.33744	7.23822	0.164024	0.0770839	0.0579434	0.0596913	5.51459	1.88318	0.852743	0.298294	0.135108	0.156993	0.0414908	0.0593589	0.056428	0.0463237	0.0186857	0.0740075	0.0759179	0.340421	0.0528993	0.108562	0.109042	0.0171611	0.0999067	0.0316925	0.0189777	0.0177673	0.02788	0.102552	0	0.0463016	0.0341939
gene31123	LOC109399078	uncharacterized LOC109399078	0.121785	0	0	0	0	0	2.94633	0.325479	0	16.2715	23.032	14.8855	14.176	22.7719	22.8714	29.5363	1.27594	0.156639	2.26658	0.176891	34.5835	68.9485	50.6811	2.69738	3.3632	2.52869	1.97711	1.80931	2.30764	1.91089	0.863827	0.986919	0.899907	4.53189	0.501642	1.12308	1.09867	1.46464	0.513181	0.150269	0	0	0.0660962	0	0	0	0.243194
gene31196	LOC109399155	uncharacterized LOC109399155	0.083961	1.32728	48.6002	18.5807	29.8477	74.2359	77.0301	86.7974	121.121	0.715427	0	0	0	0	0	0	0	0	0	0	0	0	0	0	0	0	0	0	0	0	0	0	0.093062	0.0962991	0.129691	0.18147	0	0.0315547	0.0408227	0.155398	0.0348951	0	0	0	0	0.136218	0.796399
gene31279	LOC109399308	cytochrome P450 4C1-like	0.0742323	0	0	0	0	0	0.0418461	0.892759	0	0.0202409	0	0.0506884	25.793	11.2799	0	0.0185125	0	0	0	0	0	0	0	0	0	0	0	0.0220568	0	0	0	0	0	0	0	0.0513416	0.0236356	0	0	0	0	0	0	0.0205189	0	0.337216	0.750961
gene31361	LOC109399366	chymotrypsin inhibitor Ani s 6-like	0	0	0	0	0	0	6.58828	0.230421	0.152124	0	0	0	0.864762	211.099	20.9999	1.72011	0	0	0	0	0	0	0	0	0	0	0	0	0	0	0	0	0	0.117199	0	0	0	0	0	0	0.0637025	0	0	0	0	0	0
gene31363	LOC109399368	chymotrypsin inhibitor-like	0	0.356375	0	0.0564354	0	0.113209	1.48924	0.423626	0.600747	0	0.0595822	0.0577255	0.200824	479.687	39.8321	1.24704	0.0759174	0	0	0	0	0	0	0.12623	0	0.0683888	0.122904	0.355433	0	0	0	0.0452151	0	0	0	0	0	0	0	0	0	0	0.137644	0	0	0	0
gene31364	LOC109399369	inducible metalloproteinase inhibitor protein-like	0	0	0	0.114047	0	0	0.36114	0.0856077	0.423886	0	0	0	0	279.797	16.4414	2.34325	0	0	0	0	0	0	0	0	0	0.138202	0	0	0	0	0	0	0	0	0	0	0	0	0	0	0	0	0.139077	0	0	0	0
gene31365	LOC109399370	protein diaphanous homolog 1-like	0.137242	0	0	0	0	0.06892	34.5447	0.11485	0.272422	0	0	0	4.67966	259.465	0	0.0427828	0	0	0	0	0	0	0	0	0.058011	0.138781	0.0249408	0	0	0	0	0.0556088	0	0.0262349	0	0	0	0	0	0	0	0	0	0	0	0	0
gene31366	LOC109399371	mucin-2-like	0.0580887	0	0	0.0581678	0	0	114.044	2.12493	1.92156	0.0593965	0.122822	0.0991625	89.1257	1690.57	0.213524	0.108649	0	0	0.0491413	0.0253119	0	0	0.241068	0.195157	0.0736609	0.305448	0.211128	0.733551	0.0957123	0.0707161	0	0.0941476	0	0.222083	0	0	0	0	0	0.161269	0	0.0452048	0	0.0401415	0	0	0
gene31593	LOC109399643	uncharacterized LOC109399643	0.604824	0.166283	0.0681058	0.17555	0.0755932	0.176076	61.9116	30.7517	0.652481	169.495	179.856	263.561	398.964	636.438	560.149	553.166	19.1519	2.30282	36.5005	3.75454	860.298	1190.38	1131.3	64.7291	41.9347	72.8732	35.0673	48.5941	32.1608	23.7627	17.336	36.4369	16.337	47.2328	12.0132	24.9097	16.9325	32.6401	8.86486	0.255522	0.207655	0.0102321	0	0.018172	0.133822	0.0426638	0.7483
gene31619	LOC109399647	farnesol dehydrogenase-like	0.474699	0.117713	0	0.018641	0.0356753	0.205665	19.5188	16.2594	0.443421	46.5019	114.881	146.353	313.701	291.445	289.867	341.6	2.45745	1.34681	3.61423	0.949065	598.119	159.444	33.123	8.71414	5.54742	4.78892	2.09069	3.75437	4.04881	2.87812	1.59974	1.69714	1.36181	4.22754	1.78998	1.66573	1.84485	2.68656	0.950368	0.516817	0.139263	0.0217301	0.0227323	0	0.165783	0	0.390325
gene31834	LOC109399878	aminopeptidase M1-like	0	0	0.0161626	0	0	0	0	0	0	49.0071	0.0131951	0.0255679	0	0.010226	0.0250249	0.0116725	0	0	0	0.0163159	0	0	0.0388479	0.0139775	0.0158272	0	0	0	0	0	0.0306451	0	0	0	0	0	0	0	0	0	0.0311241	0	0	0	0	0	0.056079
gene31918	LOC109400084	uncharacterized LOC109400084	0.106037	1.88115	56.0693	19.2778	25.0514	22.2702	44.2334	88.8077	72.9844	0.132518	0.124558	0.0844733	0.115452	0.0965301	0.0826792	0.055092	0	0.051144	0	0.0154017	0.0671531	0.0821242	0.158908	0.105554	0	0.0285936	0	0	0.0145597	0	0.0867837	0	0.039177	0.108106	0	0	0	0.0132838	0	0.0163548	0.11752	0.0687652	0.0575493	0	0	0.0286724	2.87623
gene3200	LOC109433276	uncharacterized LOC109433276	0.0219105	0.0846677	40.3799	19.5301	13.1085	7.70698	28.643	17.8002	30.5458	0.021574	0.0068633	0	0	0	0.0162705	0.00151783	0.00218624	0.00469685	0.00411902	0	0	0	0	0.0308985	0	0	0	0	0	0	0.0239095	0.00394572	0.0161903	0.0409529	0	0	0	0	0.00473471	0.0247822	0	0.00568359	0.00594572	0.00336466	0.0185834	0.00789945	0.561501
gene32513	LOC109400444	protein D3	0.149275	0.0629279	0.0515477	0	0	0	16.9771	2.45353	0.266678	0.0203515	0.084167	0	0.070922	177.616	46.1447	26.9276	0.643455	0	0.0505129	0	0	0	0	0	0.050478	0	0	0.0665317	0.024596	0	0	0	0	0.0913128	0	0.051622	0	0.269287	0	0	0.0496323	0.0464666	0.243048	0.309465	0.0506432	0	0
gene32527	LOC109400450	uncharacterized LOC109400450	0.435759	0.354869	16.8602	9.71876	9.54033	12.334	21.3265	45.32	24.927	0.216034	0.279201	0.0811504	0.0941058	0.227196	0.264756	0.358125	0.088937	0	0.0167563	0.0172618	0.0301054	0.0153404	0.0821999	0.0295755	0.133958	0.128188	0.0719908	0.0147134	0.0489543	0.160753	0.0972648	0.0321027	0.0292723	0.0757264	0	0	0.0945995	0.0744407	0	0.0366599	0	0	0	0	0.0335991	0.0321352	2.13588
gene32528	LOC109400432	uncharacterized LOC109400432	0.120657	1.41288	22.3332	8.75282	6.87691	6.34638	17.2497	46.6766	28.1281	0.127942	0.0755898	0.0274629	0.0318472	0.0659035	0.062719	0.0835838	0.0481569	0.478496	0.215485	0.864576	0.0611295	0.010383	0.0463634	0.0200179	0.0113335	0	0	0.0199172	0	0	0.0877769	0	0.0198127	0.0410037	0.0621243	0.0579517	0.0426858	0.0503844	0.0260731	0.136471	0.0668616	0.0834626	0.0436559	0	0.0113706	0.0326256	1.94092
gene32685	LOC109400768	mucin-2	0.0471727	0	0	0.299167	0.0301342	0.0315856	573.636	13.994	7.63937	0.0482347	0.731438	0.563696	446.091	8534.26	1.19803	0.97055	0	0	0.0399067	0.0205553	0	0.438416	0.783066	1.32069	0.338972	1.35473	0.94299	3.57421	0.116589	0.133997	0.0386075	0.191139	0	1.22638	0.0364327	0.0815657	0.0375496	0.106372	0.0458717	0.218272	0.039211	0.18355	0.115209	0.0977945	0.200048	0	0.0941999
gene32686	LOC109400700	mucin-2	0.103364	0	0	0.0517523	0	0.0346048	7.48379	3.21137	0.256469	0.140921	0.236764	0.247031	93.3479	652.31	0.431758	0.451107	0.27847	0.0249273	0.109303	0.0225201	0.196381	0.440296	0.589819	0.675235	0.567983	0.606232	0.525956	1.03655	0.447068	0.125833	0.21149	0.167527	0.152757	0.118553	0.0598729	0.0446812	0.0617083	0.0582701	0.125641	0.0239137	0	0.040219	0	0.0357142	0.0657511	0.0419243	0.0516021
gene32687	LOC109400720	uncharacterized LOC109400720	0.789323	0	0	0	0	0	38.6555	1.97768	0.65283	0.089677	0	0	54.7677	282.895	2.81349	1.55837	0.354416	0	0.445162	0	0	0.203773	0.0909913	0	0	0	0	0.0977222	0	0.42707	0.107667	0.213217	0.194418	0.201181	0.304808	0.113734	0.209434	0.197765	0	0	0	0	0	0	0	0.106717	0
gene32688	LOC109400714	mucin-2	0.978004	0	0	0.0502224	0	0.0755591	347.234	0.929652	2.31465	0.0512832	0.477204	0.154111	36.0704	2476.53	0.201117	0.187616	0	0	0	0	0	0.233062	0.260174	0.112333	0	0.152149	0.191403	1.06179	0	0	0	0.182897	0	0.201335	0.058103	0	0	0	0	0	0	0	0	0.155963	0	0	0.225345
gene32689	LOC109400701	mucin-2-like	0	0	0.0608093	0	0	0	8.8597	0.476511	0.0873867	0.024008	0.074467	0.0240489	24.7417	190.759	0.164767	0.0878318	0.126511	0	0.089383	0.0153466	0	0	0	0.446999	1.25556	0.641053	0.473624	0.209295	0.101553	0.285834	0.172946	0.0285408	0.130123	0.161578	0.0272007	0.0304485	0.056069	0.0529451	0	0.0977773	0	0	0	0	0	0	0
gene32691	LOC109400716	cysteine-rich venom protein 6-like	0.297931	0.583117	0	0.880803	0	0	156.043	0.341246	1.8164	0.261118	0.569948	0.174375	1.03634	913.344	7.39576	0.928749	0	0.0821136	0	0	0.161725	0.131853	0.294384	0	0.215885	0.447603	0.123754	0.758784	0.140257	0.449051	0.0348336	0.0689819	0.15725	0.423072	0	0.183982	0	0	0.165551	0.0787744	0	0	0	0.0588233	0.180493	0.0345259	0.0849918
gene32693	LOC109400718	chymotrypsin inhibitor	0	0.172842	0	0	0	0	3.75586	0.657467	0.419953	0	0.115589	0	0.146099	539.001	34.951	0.766881	0.22092	0	0	0.142928	0	0	0	0	0.0457533	0.0663371	0.0596084	0.466597	0	0	0	0	0	0	0	0	0	0	0	0	0.0272647	0	0.0667572	0	0	0	0
gene32695	LOC109400719	chymotrypsin inhibitor	0	0	0.090373	0.0349419	0	0	1.10057	0.314745	0.311692	0.0235488	0.0243475	0	0.197079	212.808	126.466	54.1784	0	0.0504911	0.0885588	0	0	0.0405379	0.0724059	0	0	0.0990822	0	0.0256614	0	0	0	0	0	0	0	0	0	0	0	0.0968758	0	0	0.042611	0	0	0	0
gene32696	LOC109400704	chymotrypsin inhibitor pseudogene	0	0	0	0	0	0.116822	1.21958	1.69088	0.432905	0.039248	0.102063	0	1.00197	288.506	130.383	38.0449	0	0	0	0	0	0	0	0	0	0.0945657	0	0.0427691	0	0	0	0	0	0	0	0	0	0	0	0	0	0	0	0	0.147979	0	0
gene32815	LOC109400838	uncharacterized LOC109400838	0	0	0	0	0	0	0.0402899	0.959841	0.14187	0	0.0302238	0	35.2727	59.4163	0	0	0.0513468	0	0	0	0	0	0	0	0	0	0.0207815	0.0106183	0	0	0	0.0347515	0.0105625	0	0.0220798	0	0	0.0214887	0	0	0.0237635	0	0	0	0	0	0
gene32993	LOC109401044	histone H3-like	0.0731434	0	0	0	0	0	1.97571	1.3928	0	9.40693	25.0711	17.7471	20.8506	22.6125	19.6025	21.8588	0.0218949	0.141115	0.123754	0.0637437	23.1608	8.57282	3.06918	0.527875	0.247337	0.21696	0.17723	0.289777	0.16069	0.118725	0.179588	0.0592738	0.036032	0.111856	0.169472	0	0.0582223	0.164935	0.0474175	0.0451255	0	0	0.039697	0	0	0	0.0243435
gene33474	LOC109401583	trypsin 5G1-like	0.0552822	0.116523	0.325962	1071.15	481.334	5.87916	1.90215	1.4588	1.69155	0	0.0389627	0	0	0.120782	0.323285	0.0344666	0.0163828	0	0.0781009	0	0.0420122	0	0	1.11106	0.0154224	0.0447216	0.0401854	0.0205326	0	0	0.618493	0	0	0.0422706	0	0	0	0	0.0537576	0.656371	0	0	0	0	0.117219	0	0.220788
gene33475	LOC109401584	trypsin 5G1-like	0	0	1.41425	2118.93	948.893	10.2873	5.65433	2.43934	2.41568	0	0.156554	0	0	0	0.689572	0.196308	0.0748035	0	0	0.0967907	0	0	0.0576142	2.3043	0	0	0	0	0	0	1.36346	0	0	0	0	0	0.0221017	0	0	0.796546	0	0	0	0	0.612292	0.420292	0.267805
gene33476	LOC109401590	trypsin 5G1-like	0.122773	0	0.185482	298.314	315.535	3.73006	1.26523	1.16892	1.35559	0	0.17306	0.0314375	0.00911411	0	0.0205132	0.00956807	0	0.029608	0.0259655	0	0.0116628	0	0	0.435386	0	0.0248299	0	0.0227998	0	0.0249102	0.590324	0	0.0340202	0.0352036	0	0	0	0	0	0.42606	0	0	0	0	0.0650811	0.0746949	0
gene33477	LOC109401588	trypsin 5G1-like	0	0	25.9148	232.214	39.4947	2.58021	2.61283	159.338	98.109	0.0707318	0.0401891	0	0.0277579	0.00850981	0.12495	0.0097135	0.0139911	0	0.00659003	0.0543107	0.01184	0.0120664	0.0107761	0.476898	0	0.0083184	0	0	0.0641769	0	0.0892569	0	0.0460497	0	0	0	0	0.00772901	0	0.0865072	0.161879	0	0	0.0107663	0.171783	0	0.0933348
gene33479	LOC109401586	trypsin-4-like	0	0.0303231	81.5973	41.681	1.19471	5.66401	55.0048	271.695	161.801	0.235363	0	0	0	0	0.057689	0.0358775	0	0	0	0	0	0	0.0597031	0.0214812	0	0	0	0.0641195	0	0	0	0	0	0.0660015	0	0	0	0	0	0.106507	0	0	0	0	0.0244035	0.0933613	0.0574564
gene33592	LOC109401707	uncharacterized LOC109401707	0.0344064	0.108782	0.0891091	0	0	0.0230376	19.5652	0.586203	0.102444	0.046908	0.0727486	0.0469878	10.9115	189.433	0.0919796	0.0214512	0	0.03319	0	0	0	0	0.0475955	0	0	0.139169	0	0.102232	0.0283456	0	0	0.0278822	0	0.15785	0	0	0	0	0	0	0	0	0	0	0	0.0279105	0
gene33873	LOC109402020	mucin-6-like	0.159227	0	0	0	0	0	5.77824	0.159579	0	0.271353	0.168334	0	0.141844	223.211	30.648	0.94309	0	0	0.134701	0	0	0	0	0	0	0	0.115744	0	0	0	0	0	0	0	0	0	0.126745	0.0598416	0	0	0	0	0	0.27508	0	0.129165	0
gene3390	LOC109398207	vitellogenic carboxypeptidase	0.324546	0.889292	0.336216	2940.12	5941.16	1702.91	58.0645	71.4605	14.1728	0.0110617	34.4481	2.47096	1.5034	0.150679	1.19297	0.404687	0.0437176	0.0313072	0.205917	0	0	0	0	3.74355	0	0.0393822	0.0353876	0.0241082	0.0668439	0.0395096	8.57493	0.223554	1.90654	0.0868555	0.13786	0.0420876	0.0387509	0.182959	0	5.39111	0.0134885	0.0252562	0.0264211	0.0560684	0.743213	1.32952	0.583281
gene34181	LOC109402313	uncharacterized LOC109402313	0	0	0	0	0	0.0829121	6.63141	2.44068	0.0409662	0.0562738	0	0	0.563806	126.93	41.462	40.2999	0.037067	0	0.104755	0	0	0	0	0	0.104683	0.133565	0.21003	0.306612	0.102015	0.100498	0.135126	0.100348	0.0610004	0.220928	0.223151	0.14274	0	0.155126	0.0802755	0	0	0	0	0	0.0350084	0	0
gene34188	LOC109402298	formin-A	0	0	0	0.0319508	0	0	12.1635	1.61489	0.174173	0.206629	0.281103	0.0980435	48.3208	266.5	0.373182	0.149199	0.0143268	0	0.0269926	0	0	0.111203	0.0882769	0	0	0.0774363	0.104373	0.14221	0	0.0129478	0	0.0904996	0.0117887	0.0487949	0.0369643	0	0	0	0	0	0	0.0124152	0	0.0220492	0	0.0258833	0.0637163
gene34400	LOC109402510	heat shock protein 67B2-like	0.201975	0	0.139492	0	0	0.0540948	208.444	0.0404844	0.922109	18.2841	0.0854109	0	0.11995	1124.96	0.9989	0.0755548	0	0.0779338	0	0	0	0.125142	0.111759	0	0.0341493	0.130714	0.117455	0.240053	0	0	0	0	0	0.0926622	0	0	0	0	0	0	0	0	0	0.139573	0.171306	0.0655369	0
gene34401	LOC109402478	uncharacterized LOC109402478	0.635366	0	0	0.0397644	0	0.0664725	165.121	0	0.985304	0.324835	0.195914	0.162694	0.306584	1010.74	0.517524	0.284718	0.0178305	0	0	0	0.0301783	0.0768879	0.0914628	0.0592943	0.167853	0.305183	0.187629	0.427722	0.081788	0	0.0325001	0.0643608	0	0.288457	0	0.0171657	0	0	0	0.0183743	0.0330081	0.0309027	0	0.0137207	0	0.0161065	0.0396491
gene34434	LOC109402596	uncharacterized LOC109402596%2C transcript variant X2	0.683877	0.547355	7.7351	0.714483	0.570351	3.87948	14.3007	14.4758	10.2313	24.6862	45.9456	44.194	70.752	114.04	105.656	104.525	5.49314	1.20945	7.98705	1.5562	118.361	292.609	246.27	20.1676	12.3657	17.4985	6.97349	8.73485	8.71719	7.5391	3.18721	5.88066	4.21115	15.3389	3.28643	6.27931	6.60801	6.49686	4.95068	1.24816	2.06317	3.55772	1.45371	0.315057	0.580031	0.924602	2.01053
gene34466	LOC109413169	cathepsin B pseudogene	0.370331	0	0.0456724	1.60695	13.6815	389.409	8.20138	1.32554	0.393804	0	0.0186434	0.036125	0.39274	0	0	0.0329841	0.0475096	0	0.0447555	0	0	0	0	0	0	0.0427981	0	0	0	0	0.0432985	0	0.625484	0.0404525	0.163438	3.01872	4.12698	0	6.14773	0.0489587	0	0	0	0	0.0224355	0	0
gene34469	LOC109622898	cathepsin B pseudogene	0.0860912	0	0.402456	3005.66	9438.09	3229.45	136.115	58.6427	24.0668	0.132044	36.7853	3.09597	3.36808	0.0822913	1.45282	0.550168	0.0386561	0	0.373257	0.0375138	0	0	0	4.35459	0.14556	0.104468	0.250324	0.191854	0	0.454159	14.8257	1.03185	6.64782	0.296227	1.39364	0.747273	0.30838	0.930215	0.627877	6.90463	0	0.0669964	0.122651	0.178477	1.35084	0.122215	1.19611
gene34540	LOC109402699	phosphoglycolate phosphatase 2	1.4991	0.72229	0.116143	0.466251	0.278204	0.823594	273.96	103.891	2.52437	40.1116	240.095	615.657	1894.96	1908.91	2564.67	2561.82	1.84088	0.902142	2.12438	0.910159	4022.34	792.42	48.9057	6.14127	10.5717	8.0329	3.0269	6.75283	2.50172	3.36918	3.16699	3.05266	1.33496	6.10369	1.63783	2.11586	1.80522	4.00158	1.71305	4.03737	6.25182	1.04186	0.33389	0.16389	0.472723	0.0726523	0.556497
gene34706	LOC109402886	uncharacterized LOC109402886	0	0	0.0062302	0.0164369	0.00677954	0	20.1855	5.38751	0.545617	0	0.120576	0.0556556	190.686	658.45	0.0774545	0.0494933	0.071289	0.0135137	0	0	0	0.0683863	0.0684139	0	0	0.0800166	0.0873296	0.35066	0	0.0320413	0.00590638	0.062955	0.0103517	0.0649195	0	0.00734021	0	0	0.0070177	0	0.0116445	0.0330358	0.0114046	0	0.0360052	0.0113641	0.0211929
gene34707	LOC109402888	uncharacterized LOC109402888	0.0212992	0	0	0.111475	0.0340151	0	26.5523	9.3228	0.634178	0.0362978	0.234782	0.114315	340.51	896.394	0.233738	0.134652	0.160669	0	0	0.00928101	0	0.106564	0.1099	0	0	0.0630633	0.103115	0.549645	0	0.0494384	0	0.109431	0.0157386	0.0162861	0.0328999	0.00736563	0	0	0	0.0197107	0	0	0.0114441	0.0441557	0	0.0200424	0.0106332
gene34708	LOC109402887	uncharacterized LOC109402887	0	0	0	0.0356087	0.00681482	0	15.9263	9.0999	0.924964	0.0654495	0.255038	0.0999438	329.2	931.23	0.205624	0.134886	0.109981	0.013584	0.00902486	0.00929711	0	0.178135	0.0658184	0	0	0.10943	0.0257459	0.420953	0.0175777	0.032208	0.0174621	0.0172903	0	0	0	0.00737841	0	0	0	0	0	0	0.0114639	0	0	0.0200771	0.0106516
gene34709	LOC109402891	general odorant-binding protein 69	0.0865455	0	0	0.0239769	0	0	0.22869	7.67059	0.270142	0	0	0	244.497	203.498	0.0578412	0	0.0388601	0.0417429	0	0	0	0.0335142	0.0149651	0	0	0.0175032	0.0157278	0.0909684	0	0	0	0.0115722	0	0	0	0.0187056	0	0	0.0420794	0	0.0179846	0	0	0	0	0	0
gene34710	LOC109402889	uncharacterized LOC109402889	0.15066	0	0.0620593	0.129313	0.0274978	0.0144111	270.49	33.7772	3.45325	0.0293431	0.498157	0.274237	1157.54	4706.85	0.349253	0.10735	0	0.0207619	0	0.0937845	0	0.471403	0.565691	0	0.10917	0.504928	0.359841	2.12382	0	0	0.0236039	0.505807	0.0104966	0.27977	0.0332453	0.0186074	0.0400893	0	0.0908329	0	0	0	0	0	0.0365092	0.0349186	0.0644688
gene34925	LOC109403114	uncharacterized LOC109403114	0.0257328	0.0542391	0	0	0	0	0.108795	0.464216	0.0255396	0.0350829	0	0	18.94	48.7069	0.0343961	0	0	0	0	0.0448518	0	0	0.0711941	0	0.0435082	0	0	0	0	0	0	0	0	0	0	0	0	0	0	0	0	0	0	0	0.065476	0	0
gene34927	LOC109403128	keratin-associated protein 9-1	0.133844	0.0282114	0.0693286	0.0178702	0	0.0537711	90.465	2.22673	0.61106	0	0.0565998	0.109672	85.1477	649.216	0.697729	0.283721	0.745213	0.129112	0.181165	0.0933151	0	0.0414642	0.0555453	0.099926	0.13578	0.129931	0.136211	0.656195	0.0882136	0.173802	0.109542	0.15185	0.237364	0.532178	0.186069	0.208286	0.170464	0.201209	0.0520612	0.0247724	0.0445017	0.104158	0.0217923	0.0369966	0	0.217149	0.0267275
gene34928	LOC109403129	late cornified envelope-like proline-rich protein 1	0.145136	0	0	0	0	0	24.5192	15.4912	1.72856	0	0.281302	0.099104	509.645	1930.63	0.606245	0.565547	0	0	0.0306952	0	0	0	0.200771	0	0.276065	0.176116	0.105502	0.646869	0.0597849	0	0	0.176423	0	0.110976	0	0.0627382	0	0.0818189	0.10585	0	0	0	0	0.0250737	0	0	0
gene34929	LOC109403130	sperm mitochondrial-associated cysteine-rich protein	0.0851231	0.0448552	0	0.113652	0	0	171.278	0.639836	0.887081	0	0.0899917	0.0290625	32.3289	1471.06	0.142226	0.238821	0	0	0	0	0	0.0659267	0.206069	0	0.0359809	0.206586	0.185632	0.695552	0	0	0	0	0	0.227808	0	0	0	0	0	0	0	0	0	0	0.0360986	0	0.0424959
gene34930	LOC109403091	uncharacterized LOC109403091	0.153616	0	0	0	0	0	0.185564	0.483863	0.130682	0.388947	1.02082	0.224774	25.714	45.8728	0.454667	0.793561	0	0.0846774	0	0.019125	0.466969	0.526884	0.166966	0.0655358	0.0185521	0.0532591	0.0319046	0.0326031	0	0.0712418	0.0179606	0.106703	0	0.0839002	0.0338977	0	0.0174684	0	0	0	0	0	0	0.0606599	0	0	0
gene35027	LOC109403201	major royal jelly protein 1	0.492351	0.0178925	0	0	0	0.0113677	0.299081	7.41862	0.101101	0.0578661	0.203418	0.139115	260.256	114.97	0.13616	0.0952647	0.0304927	0.0655095	0.186713	0.0887749	0.0516092	0.105192	0.140914	0.595736	0.172231	0.109875	0.234484	0.100892	0.0699347	0.110231	0.11116	0.0412749	0.137998	0.207707	0.0917859	0.117423	0.0945995	0.178658	0.0660376	0	0	0	0.0414641	0.117322	0.115197	0	0
gene35098	LOC109403258	glucose dehydrogenase [FAD%2C quinone]-like	0.00972355	0.00512377	0.0223289	0.00649119	0.00409956	0	0.0479617	1.3838	0	0.503751	1.08965	1.42751	35.5913	0.424885	0.662853	0.733539	0.2183	0	0.0329033	0.0169479	0.266022	0.414192	0.302645	0.123411	0.00822013	0.0393303	0.038875	0.0216688	0.0720963	0.0197288	0.0716223	0.0787975	0	0.0669146	0.030039	0.0168129	0	0.051161	0.0283661	0	0.0161648	0	0.0316635	0.141106	0.189682	0.0236632	0.0582513
gene35125	LOC109403304	histidine-rich glycoprotein	0.341492	0	0	0	0.0335611	0.202271	0.00925506	8.24028	0	1.56683	178.426	1590.31	275.3	0.53088	0.0351123	0.0491328	0.208299	0.0633498	0.0777786	0.0572321	0	0.0305171	0.390636	0	0	0.0318758	0.391449	0.0292697	0	0	0.064497	0.0638626	0.0388214	0	0.010144	0.0794863	0.0418198	0.0592346	0	0.0121547	0	0.0102212	0.0106926	0.0272289	0.0111399	0	0
gene35133	LOC109403334	peroxidase skpo-1	0.193705	0.0226827	0	0.00718404	0	0.00720554	3.06353	0.733395	0.0640836	0.41814	0.182031	0.0808309	19.6183	67.3202	0.489069	0.221409	0.222273	0	0.0182076	0.00937845	0.0245347	0.0166691	0.0446598	0.216926	0.100073	0.121879	0.0547584	0.0559573	0.0265972	0.11354	0.105689	0.139533	0.166991	0.123428	0.24934	0.148859	0.162756	0.177954	0.209292	0.0597528	0.00894511	0.00837455	0.0438039	0	0.0091273	0.00872965	0.0322344
gene35134	LOC109403335	peroxidase skpo-1	0.629948	0.0114465	0	0.0507545	0.00693818	0.00727235	17.7863	0.718424	0.538981	1.15499	1.57691	1.2682	26.3624	270.632	3.29553	2.80343	0.0390145	0.0314316	0.0918822	0.0283962	0.949216	1.73284	1.53251	0.129741	0.257092	0.272377	0.331596	0.508285	0.697939	0.520073	0.560013	0.466488	0.433386	0.639472	0.645905	0.394378	0.354466	0.400027	0.0950547	0.0301534	0.00902804	0.0169044	0.00884201	0.180132	0.0644835	0.0792953	0.0867554
gene35147	LOC109403347	uncharacterized LOC109403347	0.338219	0	0.0906158	0.0467144	0.0273175	0.0442512	0.988912	1.10262	0.081026	118.847	85.4563	116.801	33.3549	12.0164	21.3753	25.2872	0.157101	0.0825029	0.0920855	0.121967	5.01952	4.20318	3.08955	0.859111	0.236628	0.336508	0.285419	0.268566	0.179355	0.107274	0.244991	0.185874	0.132142	0.133766	0.156129	0.120995	0.15782	0.239612	0.151214	0.0143905	0.0872487	0.0423545	0.0189891	0.0671616	0.00659451	0.0031536	0.0892763
gene35199	LOC109403415	uncharacterized LOC109403415	0.772793	0	0	0	0.0205694	0	6.17153	2.90439	0.0639158	51.9989	50.0408	52.9449	67.0259	83.9284	76.8267	85.3808	0.693988	0.372736	0.926159	0.224494	103.535	49.0286	22.8282	2.3559	1.44272	1.90155	0.795819	0.885	0.742772	0.966916	0.790595	1.14813	0.452074	2.73293	0.323293	0.723789	0.563882	0.677683	0.532298	0.148991	0.0535301	0	0	0.0222512	0.0273102	0.0522408	0.28935
gene35538	LOC109403768	tubulin alpha-8 chain	0.32263	0.0340017	0.0139263	0.021538	0.0103049	0	6.36554	2.03707	0.0480312	20.4314	23.3074	35.5349	39.3462	54.4911	41.9928	41.9597	0.159352	0.0155612	0.136468	0.140585	43.5573	16.679	4.21758	0.566047	0.422757	0.443697	0.386966	0.431387	0.252508	0.314211	0.0924175	0.300671	0.202641	0.382376	0.062294	0.181303	0.17977	0.254631	0.14118	0.0447852	0.0268177	0.062768	0.0262651	0.13377	0.0410459	0.0523436	0.19328
gene35602	LOC109403838	BTB/POZ domain-containing protein 6-like	0.137106	0	0	0.00823006	0	0.0250142	6.29157	1.82825	0.136076	11.3409	19.9648	23.6855	42.8791	44.2966	41.2342	46.7328	0.425065	0.150277	0.595106	0.135765	65.2018	109.788	56.0738	2.30577	1.46858	1.54646	0.651755	0.855564	0.687265	0.288037	0.387389	0.499529	0.202347	0.756988	0.283625	0.220596	0.322056	0.336967	0.175465	0.0805533	0.0208056	0.00959392	0	0.0258162	0	0.0151526	0.043642
gene35644	LOC109403981	L-asparaginase-like	0	0	0.167826	9.22008	0.101605	5.32023	0.946436	191.55	23.6539	0.277084	0	0	0	0	0	0	0	0.0681921	0	0	0	0	0	0	0	0	0	0	0	0	0	0	0	0.0135132	0	0	0	0	0	0.065419	0	0	0	0.0244252	0.0299785	0	0
gene35984	LOC109404331	uncharacterized LOC109404331	0.0347957	0	0	0	0	0	0.0490374	0.209236	0	0	0	0	9.89135	31.2388	0	0	0	0	0	0	0	0	0	0	0	0	0	0	0	0	0	0	0	0	0	0	0	0	0	0	0	0	0	0	0.029512	0	0
gene35987	LOC109404340	keratin-associated protein 9-1	0.0477372	0.0167699	0.0961602	0.0531136	0.0203299	0.0106545	46.5997	1.41934	0.363237	0.0433884	0.033645	0	47.4019	391.394	0.457295	0.208338	1.08602	0.107449	0.134614	0.249615	0	0.0246479	0.0330182	0.10692	0.269042	0.102981	0.127237	0.342786	0.235968	0.154972	0.390695	0.0902654	0.25868	0.365015	0.307239	0.123813	0.151996	0.21529	0.309471	0.0736281	0.0793604	0.185746	0.0647709	0.109961	0.134961	0.0516326	0.142991
gene35988	LOC109404324	SCO-spondin	0	0	0	0	0	0	8.49652	5.70208	0.449175	0	0.159486	0	204.827	915.004	0.410494	0.2217	0	0	0.0273473	0	0	0	0	0.0482691	0.0819853	0.104605	0.0469974	0.192106	0	0	0	0.104787	0	0.0494361	0	0.0558956	0	0.0242984	0.0314351	0	0	0	0	0.0223389	0	0	0
gene35989	LOC109404328	sperm mitochondrial-associated cysteine-rich protein	0.248073	0.0435736	0	0.0552024	0	0	98.9682	0.787303	0.615525	0	0.0874205	0.0282322	14.8064	815.29	0.0828976	0.0773326	0	0	0	0	0	0	0.0285973	0	0.0349528	0.133789	0.0601093	0.368552	0	0	0	0	0	0.221299	0	0	0	0	0	0	0	0	0	0	0.0350673	0	0.0412817
gene36738	LOC109405118	uncharacterized LOC109405118	0.0807459	0	0	0.161712	2.28675	0.324391	226.028	45.7494	3.17887	83.2242	105.308	64.7665	733.656	3422.96	1151.45	1154.98	0	0.0259637	0.045539	0.0938256	0.0204545	0.354374	0.46541	0	0.0227537	0.522568	0.273912	1.55949	0.0443481	0.218441	0.0440565	0.28355	0	0.514508	0.0207874	0.0232694	0.0214246	0.141616	0	0.174355	0.0894902	0	0.0438231	0.0929975	0.296767	0	0.564349
gene36812	LOC109405205	uncharacterized LOC109405205	0.434554	0	0.0208417	0.0161165	0.0462659	0.0161647	1.83724	1.62109	0.167724	37.5712	73.8967	42.8773	36.7614	31.8848	36.6582	48.2706	0.520321	0.209595	0.898625	0.168315	39.9778	37.9934	23.3106	1.96461	1.36741	1.54287	0.737062	0.950466	1.2928	0.705356	1.00768	0.802126	0.499497	2.71358	0.559362	0.626151	0.365123	0.871022	0.328665	0.0893653	0.0401345	0	0.0196537	0.0333659	0.0614279	0	0.241046
gene36814	LOC109405221	uncharacterized LOC109405221	0.156525	0	0	0.104492	0	0	1.5809	1.20268	0	33.3792	67.4966	42.2358	34.6734	37.6321	34.0394	40.7268	1.33536	0	1.30209	0.295556	47.9777	67.5233	22.8255	2.80463	3.41837	3.37665	1.3464	1.84097	2.14921	1.41855	0.683226	1.56442	0.848184	4.02938	0.463407	1.33068	0.97599	1.74518	0.431258	0.0724257	0.0433691	0	0	0	0.0221262	0.0423245	0.0520946
gene3712	LOC109401213	uncharacterized LOC109401213	0.153036	0	0	0.0510816	0	0.0768517	2.69591	0.6135	0	13.4835	24.0257	11.6777	10.3156	14.8789	20.3024	26.3101	1.61481	0.332158	3.07477	0.100027	34.9485	71.3517	52.3693	3.85609	2.45811	4.73542	2.66986	2.50096	2.17485	1.58358	1.09593	1.51921	0.904665	4.79768	0.9751	0.562303	0.42636	1.52415	0.632466	0.0354056	0.0636035	0	0	0	0.064899	0	0.0382
gene37184	LOC109405603	general odorant-binding protein 45	0	0	0	0	0	0	0	3.2854	0	0.0197755	0	0.0198091	88.9345	1.95439	0	0	0	0	0	0	0	0	0	0	0	0.0469366	0	0.0430992	0	0	0	0	0.0857458	0	0.0224053	0	0	0	0	0	0	0	0	0.0400942	0	0	0
gene37434	LOC109405844	general odorant-binding protein 45	0.824246	0	0	0	0.0135008	0.240569	0.744619	10.7177	0.0419516	0	0.0744777	0	390.958	36.3284	0.112999	0.131767	0	0.0407746	0	0	0	0	0	0	0	0.0341944	0.015363	0.0156994	0	0	0	0.0342539	0	0	0	0	0	0	0	0	0	0	0	0	0	0.0171443	0
gene37435	LOC109405843	uncharacterized LOC109405843	0.111948	0	0	0	0.0357565	0	46.3443	3.78661	0.444429	0	0.118351	0.0191105	132.919	653.551	0.205751	0.0872447	0	0	0	0	0	0	0.0774306	0	0	0.0226406	0.0610325	0.395002	0	0	0	0.0226801	0	0.0427996	0	0	0	0	0	0.0517993	0	0	0	0	0	0	0
gene37456	LOC109405893	uncharacterized LOC109405893	0	0	0	0.0541408	0	0	47.3181	0	0.670765	0.0184281	0.0190532	0.110757	1.4931	776.604	0.343281	0.168545	0	0.0260778	0.0457392	0	0	0	0.224379	0	0	0.174955	0.0786045	0.361465	0	0	0	0.219074	0	0.0413416	0	0.0233717	0.0430376	0	0	0	0	0	0	0	0	0.0438593	0.0269919
gene37457	LOC109405892	uncharacterized LOC109405892	0	0	0	0.0361336	0	0.0181209	53.2247	0.0271232	0.590923	0.221381	0.0190742	0	0.530393	750.402	0.108524	0	0	0	0	0.0235854	0	0.0209602	0.0561564	0	0	0.131361	0.0393455	0.321655	0	0	0.0221494	0.0657946	0	0.186242	0.0209017	0	0.0215425	0	0	0	0	0	0	0	0.0918152	0.0658613	0.270216
gene37467	LOC109405885	vitelline membrane protein 15a-3	0.169129	0	0	0.301767	0.240636	1.39754	2.21451	223.255	0.0381498	24.1304	2394.77	9588.44	8072.92	20.1786	0.620661	0.968187	0	0	0	0	0.105162	0.757349	0.62053	0.0763354	0	0.62191	2.1839	0.966811	0.0107669	0.0205894	0	1.26904	0.0965713	0.00999304	0.0831236	0	0.175627	0.0577846	0	0.154381	0.0511213	0.0101704	0.0312924	0.115281	0.219735	0.0311812	0.0767582
gene37469	LOC109405886	vitelline membrane protein 15a-3	0.329533	0	0	0.341185	0.229999	1.24982	2.77087	316.23	0.109777	23.5419	2367.98	9288.39	11840.8	44.3812	0.981383	0.8941	0.0458965	0	0.0374281	0	0.132172	1.13844	0.929646	0.0210715	0.0535239	0.543039	2.53405	0.984815	0.0106834	0	0.0249722	1.34265	0.155007	0.0874904	0.0353482	0.0217629	0.174266	0.0189211	0.0890125	0.0472964	0.105888	0.0100915	0.0745197	0.0437518	0.0756963	0	0.0152326
gene37470	LOC109405887	vitelline membrane protein 15a-3	0.735053	0	0	0.52123	0.386789	1.10682	2.41373	377.083	0.0378214	34.9425	3201.69	12769.2	13839.8	49.9634	1.44435	1.22595	0.0889762	0	0.0179099	0	0.273513	1.19892	1.53636	0.0651201	0.0236247	0.710412	2.60266	1.31913	0.0118602	0.0226803	0.027723	1.62643	0.357931	0.140512	0.170049	0	0.0842603	0.0210053	0.0164696	0.0133225	0.131631	0.0112032	0.151669	0.0485713	0.0265751	0	0.0169106
gene37739	LOC109406230	BTB/POZ domain-containing protein 6	0.337958	0	0	0.0081191	0	0.0123385	6.1548	1.96982	0.0976634	13.8134	23.9945	27.5814	55.0066	51.3992	48.162	51.3837	0.468978	0.254906	0.368836	0.149994	72.8371	122.646	63.118	2.61862	1.91612	1.79393	0.602781	0.83034	0.632454	0.343975	0.502818	0.388262	0.240469	0.718601	0.279801	0.408797	0.317714	0.484784	0.137261	0.113573	0.0511596	0.00946456	0.0150016	0	0	0	0.0614526
gene37740	LOC109406235	BTB/POZ domain-containing protein 6	0.342577	0	0	0.00823006	0	0.0125071	6.97601	2.42731	0.0989982	13.7475	23.5326	28.1497	55.7806	52.6424	48.5665	53.4795	0.576035	0.276409	0.579304	0.233438	74.5992	125.784	64.2907	2.51496	1.73703	1.83356	0.638176	0.716809	0.856542	0.394156	0.479114	0.408706	0.188545	0.742705	0.211492	0.365937	0.366663	0.631813	0.120973	0.115126	0.0208056	0.00959392	0.0152067	0	0	0.0151526	0.0809429
gene3842	LOC109406901	general odorant-binding protein 45-like	0.025077	0.237856	0.021649	0.284593	0	0	2.0321	1.55822	0.248887	0	0	0	50.0499	58.3639	0.184358	0.125077	0	0	0	0	0	0	0	0	0.0423994	0	0	0.018628	0	0	0	0	0	0	0	0	0.0798455	0	0.0487709	0	0	0	0	0	0	0	0
gene388	LOC109403024	uncharacterized LOC109403024	0.401735	0	0	0.0151804	0.0242104	0.0329894	0.331152	0.34185	0.0451379	10.4503	6.0448	6.38526	3.07234	7.31572	9.84977	7.81021	0.534346	0.0329036	0.589938	0.0363319	9.9665	12.9954	112.328	5.0177	3.11855	3.4584	3.24166	3.52379	3.65313	2.07314	1.18179	1.39437	0.536746	3.81848	0.506385	0.50787	0.374084	1.06257	0.246924	0.0140292	0.0283526	0.0442403	0.0647928	0.02619	0.0160723	0.015372	0.0151364
gene4000	LOC109403236	uncharacterized LOC109403236	0.0349559	0.0229902	0	0.00579006	0.106278	0.0909825	0.858032	0.509168	0.00860815	17.2621	31.8084	16.789	13.5412	7.98898	12.393	16.2907	0.0866213	0.139444	0.318618	0.160335	45.655	68.1708	23.3656	1.10866	0.429492	0.776059	0.1943	0.247363	0.241862	0.266633	0.290392	0.163362	0.100407	0.633043	0.135393	0.0947528	0.0558592	0.237065	0.0299026	0.00802641	0.0618262	0.0987891	0.00706086	0.0394123	0.0185021	0.0142847	0.0656053
gene4083	LOC109622040	mucin-2-like	0	0	0	0.0481605	0.046085	0	74.3716	1.75911	0.751807	0	0.0762686	0.0492614	51.9346	793.186	0.0723227	0.0899567	0	0	0	0	0	0.0558734	0	0	0	0.0583611	0.131104	0.294743	0	0	0	0.0584626	0	0.15611	0	0	0	0	0	0	0	0	0	0	0	0	0
gene4084	LOC109404246	location of vulva defective 1-like	0.0642313	0	0	0.0214396	0	0	104.023	1.96339	0.860611	0	0.18108	0.131578	79.7633	1082.76	0.837092	0.060069	0.0576814	0	0.0271688	0	0	0.0497462	0.155493	0	0	0.0259806	0.0933813	0.453273	0	0	0	0	0	0.14734	0	0	0	0	0	0	0	0	0.0522902	0	0	0.0260522	0.0641322
gene4085	LOC109622041	location of vulva defective 1-like	0.0167922	0	0	0	0	0	0.141991	1.19488	0.0999966	0	0.0473404	0.0114663	38.7138	62.9598	0.0448911	0.0314081	0	0	0	0	0	0.0130053	0.0232292	0	0	0	0	0.0124738	0	0	0	0.0272161	0	0	0	0	0	0	0	0	0	0	0	0	0	0	0
gene4086	LOC109622042	uncharacterized LOC109622042	0	0	0	0	0	0	0.0330815	1.97617	0.0232976	0	0	0	58.0772	94.2513	0.0313766	0.0292703	0	0	0.0198581	0	0	0.0363603	0.0487081	0	0	0	0.0341269	0.0871853	0	0	0	0	0	0	0	0	0	0	0.0456529	0.0217231	0	0	0	0	0	0	0
gene411	LOC109404329	farnesol dehydrogenase	0.377577	0.183657	0	0.0581678	0.0371074	0.29171	23.2903	18.7751	0.749483	55.0407	122.338	178.843	360.188	340.298	347.061	403.788	2.29527	1.51295	4.20158	1.44278	681.614	193.242	40.2383	10.3433	5.52457	6.20295	3.18803	4.42288	4.30705	3.3708	1.80658	2.47138	1.33063	4.48608	1.99642	1.68238	2.19634	2.96905	0.819057	0.215025	0.0482846	0.0678072	0.0236448	0	0.0739021	0	0.347995
gene4113	LOC109404517	histone H1-like	0.146308	0.110137	0.180439	0.013953	0	0.0139948	1.38442	1.194	0	2.23205	10.5645	7.06463	27.0061	44.5731	50.163	115.697	3.96041	0.927458	11.4549	1.20219	208.299	173.067	143.144	43.4686	33.5836	48.3748	19.2551	24.9915	23.3607	13.2651	5.66484	8.79071	4.19564	32.5122	4.1809	7.18567	4.81384	10.3163	1.65971	0.328818	0.0868671	0.0813264	0.0340309	0	0.0177273	0.016955	0.146082
gene4114	LOC109404502	histone H2A	0.0529045	0	0	0	0	0.0354234	1.31744	0.724274	0.105014	0.757337	8.81462	6.99019	20.5324	34.3727	40.3135	103.059	2.62918	0.901261	14.9215	0.968219	312.035	203.148	133.644	68.7259	46.3195	73.8696	25.5224	32.2511	28.2022	13.8402	5.16725	4.24439	2.60592	44.1475	3.01707	4.77232	4.27437	8.79459	1.6977	0.440629	0	0	0	0	0	0	0
gene4116	LOC109405002	histone H2A	0	0	0	0.0353177	0	0.0354234	2.07495	0.406145	0	0.348375	11.9937	4.89494	14.1122	18.046	19.0522	28.526	0.776307	0.459306	3.84898	0.445381	110.309	96.3155	45.9174	20.1438	10.436	15.2507	5.20477	5.65906	4.70719	3.42033	0.664199	1.52884	0.885841	8.46833	0.933232	0.976053	1.42507	2.15371	0.445517	0.146876	0	0	0	0	0	0	0
gene4117	LOC109405012	histone H2B	0.107661	0.0567315	0	0.143744	0.0343873	0	9.10358	2.91328	0.106853	3.00899	55.253	40.6169	62.9537	119.789	108.554	129.567	6.5019	3.37528	22.4735	3.51846	434.502	462.838	259.953	44.4411	21.8436	44.0769	12.2086	15.8748	12.8166	8.67211	6.27805	9.55346	4.21637	30.7882	4.24063	9.7108	8.4413	9.54899	2.51261	0.249079	0.0894902	0	0.0438231	0.037199	0	0.0873347	0.107495
gene4300	LOC109407276	uncharacterized LOC109407276	0.207225	0	0.0255567	0.0197626	0	0	1.83902	0.919742	0	9.10805	35.5114	19.8776	14.8501	11.4213	19.5741	24.3383	2.04703	0.599696	2.05358	0.670779	35.0736	57.2424	36.4604	2.6597	2.72788	3.64016	1.65698	2.55089	2.48766	2.95518	0.847995	2.1831	1.18125	3.39538	1.64618	1.53561	1.48456	2.71469	0.575743	0.0273957	0	0.0460752	0	0	0.0251083	0	0.0886737
gene4301	LOC109406800	uncharacterized LOC109406800	0.103581	0	0	0	0	0	4.34281	1.76478	0	34.9394	92.3739	44.0875	41.4922	27.5433	36.7248	45.5608	2.55802	0.799354	3.50507	0.992971	75.6673	87.5491	60.2165	5.25859	5.12261	6.74544	2.29649	2.42372	5.1201	2.90025	0.466257	2.39229	1.56906	7.95978	2.35996	2.23876	2.37046	2.49143	0.251812	0.383424	0	0	0	0	0	0	0.465397
gene4302	LOC109407277	uncharacterized LOC109407277%2C transcript variant X3	0.151388	0	0.0653467	0	0	0.0506827	5.78713	2.90777	0	49.2252	158.34	91.8816	65.0928	40.497	66.4737	80.3691	4.28244	1.16829	4.73858	1.71513	143.878	147.517	79.4487	7.38442	8.55362	7.70511	2.43037	3.327	3.85573	4.33098	2.72581	4.23252	2.04154	10.5529	2.71842	3.28317	2.44023	4.35251	1.39852	0.420292	0.188756	0	0	0	0	0	0.302309
gene4303	LOC109407278	uncharacterized LOC109407278	0.153116	0.107578	0	0.034072	0.0326037	0	11.077	4.04097	0	59.459	168.132	99.7432	75.3229	51.5735	95.1006	106.6	9.48763	2.65864	12.694	3.6918	170.819	272.194	249.335	29.0357	20.0203	22.5436	9.60907	13.5728	13.2871	12.1367	4.21891	9.05795	4.29939	23.1423	7.01648	6.26575	7.15031	10.2813	3.42453	0.661248	0.212122	0.158873	0	0	0.0865768	0.0414025	0.0509598
gene4304	LOC109407279	uncharacterized LOC109407279	0.333191	0	0	0	0	0.0371826	9.70432	2.83839	0	27.5203	81.5257	48.9914	50.1289	48.2882	58.3056	59.6886	5.28611	1.76776	7.56349	2.95212	86.5983	185.367	151.372	10.9867	9.99943	12.0844	4.19815	7.38387	8.00618	8.33774	2.31789	6.97527	2.54412	10.0209	3.43109	3.84077	2.87322	5.59323	2.21401	0.10278	0	0	0	0.0767492	0.0470993	0	0.27723
gene4305	LOC109407281	uncharacterized LOC109407281%2C transcript variant X2	0.486452	0.0366191	0.149983	0	0	0.279184	3.62364	2.2287	0.2414	31.8338	69.3781	38.7923	27.9198	22.8505	31.977	33.4698	4.7117	1.13962	5.70254	0.999282	90.0444	104.189	110.047	11.2585	9.60536	10.063	5.55671	6.76243	6.04005	5.07598	2.78688	9.32025	2.72158	9.93658	3.32763	3.03403	4.34236	6.81662	1.99351	0.321551	0.0577642	0.10816	0.0565739	0.0240112	0	0	0.277544
gene4362	LOC109407289	uncharacterized LOC109407289	0	0	0	0.0181667	0	0	56.5296	0	0.891286	0.0556513	0.0191796	0	1.40604	954.913	0.309185	0.169664	0	0.0262509	0.0920855	0	0	0	0.150579	0	0	0.0880581	0	0.283005	0	0	0	0.132317	0	0.041616	0	0.0705805	0.0433232	0	0.052925	0.1511	0	0	0	0	0.0923231	0	0.027171
gene4363	LOC109407290	uncharacterized LOC109407290	0	0	0.0455744	0	0	0.0176737	49.642	0.0264539	0.366762	0.143945	0.0558103	0.0360475	0.830822	761.382	0.105846	0.0329134	0	0	0	0.0690101	0	0.0613288	0.0912842	0	0	0.0854126	0.115124	0.196073	0	0	0.0216028	0.0641709	0	0.100914	0.0203859	0	0.0210108	0	0	0	0	0	0	0	0.0447747	0.021412	0.210838
gene4373	LOC109407215	vitelline membrane protein 15a-3-like	0.405373	0	0	0.229228	0.112721	1.52478	2.54728	241.029	0.0157776	20.6561	2465.67	9766.4	8893.72	26.3856	0.870143	0.7592	0	0	0.0390002	0	0.0906079	0.715943	1.02917	0.0219566	0	0.530482	2.1823	1.0374	0.0111322	0.0645089	0.0260211	1.16587	0.102784	0.0911653	0.0798048	0.022677	0.0708625	0	0	0.049283	0.0660695	0.0105154	0.0452957	0.0642647	0.0249436	0	0.0158724
gene4374	LOC109407216	vitelline membrane protein 15a-3	0.42238	0	0	0.573646	0.548436	2.12111	3.8406	565.308	0.110118	46.4954	3719.13	15458.8	20836.1	81.5168	1.86506	1.77229	0.0803969	0	0.0375445	0	0.402403	1.56867	1.78886	0.0211371	0.0536904	1.20707	4.20615	1.8149	0.0107166	0	0.0250498	2.12503	0.353385	0.175525	0.224569	0.0218306	0.250943	0.0189799	0.163697	0.366094	0.106218	0.129216	0.168191	0.255396	0.0889116	0	0.0916801
gene4375	LOC109407296	vitelline membrane protein 15a-3-like	0.22972	0	0	0.151638	0.0985609	1.08014	1.94668	230.973	0.0382827	20.9345	2153.73	8421.96	8339.13	24.9193	0.857586	0.729472	0	0	0	0	0.146567	0.705684	0.650379	0.0979115	0	0.525612	1.81941	0.829018	0.0120049	0.0229569	0.0280611	0.927325	0.115909	0.0439129	0.0860613	0	0.0532197	0	0.0166705	0.013485	0.0712492	0.0113398	0.0488467	0.0100696	0.0268992	0.0347665	0.0171168
gene4419	LOC109407347	uncharacterized LOC109407347	0.0854186	0	0	0	0	0	2.06652	21.2307	0.706477	0.0582278	0.381284	0.836018	725.288	1088.01	0.190293	0.213023	0	0	0	0	0	0.0441037	0.216631	0	0.144423	0.161236	0.124184	0.676817	0	0	0	0.0922952	0	0	0	0	0	0	0.0553753	0.0526986	0	0	0	0	0	0	0
gene4426	LOC109407351	uncharacterized LOC109407351	0	2.23022	117.104	80.9128	67.321	65.5333	197.541	256.518	257.968	0.0721273	0.0372869	0	0	0	0.0707155	0.0659683	0	0	0	0	0	0	0	0.355479	0	0.0427981	0	0	0	0.0429366	0.30309	0	0.117278	0.404525	0.0408595	0	0	0	0.154336	0.0489587	0	0	0	0	0	0	1.05646
gene4429	LOC109407364	37 kDa salivary gland allergen Aed a 2-like	0.59252	2.17401	290.04	135.293	50.0889	56.6891	228.212	495.696	340.951	0.433826	0.0928015	0	0	0.0239732	0.102667	0.0957746	0	0	0.018565	0	0	0	0	0.212991	0.129865	0	0.0478569	0.0163016	0	0	0.0359212	0	0.0972959	0.335601	0.0508466	0	0	0	0	0.243702	0	0.0170778	0.0714618	0	0.0558386	0	0.723075
gene4492	LOC109407389	BTB/POZ domain-containing protein 6-like	0.91512	0.0189105	0	0.0718719	0.0114624	0.0600725	7.59896	1.76236	0.0534263	32.1326	52.7993	56.7779	54.3796	70.3702	54.2888	72.3922	1.51469	0.328874	2.38321	0.218926	82.4454	72.8065	39.8763	4.90307	5.17269	5.92244	2.06086	3.34558	2.82349	2.41741	0.88113	2.28294	1.43197	7.68333	1.16409	1.90809	1.24263	1.95566	0.52346	0.066421	0.0447451	0.0418911	0	0.037199	0.0304377	0.0436674	0.143327
gene4626	LOC109407653	uncharacterized LOC109407653	0	0.0539008	102.877	46.9806	32.0507	94.2082	175.185	387.509	267.102	0.34864	0.0720932	0.0698467	1.18459	0	0.170908	0.31887	0	0.0986729	0	0.089144	0.0777357	0	0.07075	0	0	0	0	0	0	0	0	0	0	0.234642	0.0790007	0	0	0	0	0.283981	0	0	0	0	0	0	0.919183
gene464	LOC109622074	vitellogenin-1-like	0.232446	0.0204144	0.0501677	0.0517251	0	0.02594	6.19682	1.41718	0.249926	20.8894	30.663	39.178	44.6465	63.429	62.6713	86.6395	2.60929	0.242914	4.19504	0.573961	99.3508	129.649	98.0059	6.1607	23.5153	39.3948	58.8433	90.4781	70.7273	38.0288	20.1497	14.0649	5.25305	145.714	7.2109	4.10293	3.62346	11.5897	2.48639	0	0.144911	0.693413	2.17618	0.0803147	0.213579	0.188561	0.212747
gene4680	LOC109407682	mucin-2-like	0.0884118	0	0	0.0147554	0	0	0.0155748	0.0221519	0	0.843754	23.5073	41.6105	1.12889	0.0482911	0.0147721	0	0.258037	0.042643	9.06873	0.038525	0	0.0171184	0.0152879	62.0794	181.772	134.695	2.32971	2.20011	3.20486	0.269077	0.307525	0.0895587	0.0979953	0.50702	0.0170707	0.0191089	0.0703759	0.13291	0.0644801	0.0409089	0.0918622	0	0.0179938	0	0	0.0717196	0
gene4858	LOC109407759	uncharacterized LOC109407759	0.380083	0.0828757	46.0508	13.8504	16.7364	14.278	44.2003	69.3677	41.8334	0	0.0184746	0	0	0	0.00875938	0.0163427	0	0	0	0	0	0	0	0.01957	0	0	0	0	0	0	0.0643596	0	0.0484233	0	0	0	0	0	0	0.0606441	0	0	0	0	0	0.0212637	0.392583
gene4859	LOC109407760	uncharacterized LOC109407760	0	0.162131	43.3869	21.3943	21.5221	14.9642	43.7951	98.522	48.9983	0.0286008	0.00985697	0	0	0	0	0	0.0125594	0	0	0	0	0	0	0.0835311	0	0	0	0	0	0	0.0343385	0.0113336	0	0.0962444	0	0	0	0	0	0.0258849	0	0	0	0	0.0237237	0	0.0698199
gene4863	LOC109407763	fibrinogen-like protein A	0.426445	0.140446	19.696	12.1229	11.5606	11.4036	27.082	55.427	36.5931	0.181686	0.0375697	0	0	0	0	0	0	0	0.045095	0.0464553	0	0	0	0.0596958	0	0	0	0	0	0	0.0218135	0	0	0.0407593	0	0	0	0	0	0.0986601	0	0	0	0	0	0	0.0532234
gene4963	LOC109407891	mucin-6	0	0	0.0373902	0	0	0	16.1549	0.477474	0.372256	0	0.0201467	0	16.4789	146.458	0.0578921	0.0540057	0	0	0	0	0	0	0.0299567	0	0	0	0	0.0643452	0	0	0	0.0350982	0	0	0.0220771	0	0	0	0	0	0	0	0	0	0	0.105401	0.0864881
gene501	LOC109622121	general odorant-binding protein 45-like	0	0	0	0	0	0	0.1148	3.40163	0.026949	0	0	0	128.861	92.5907	0	0	0.0243841	0	0	0	0	0	0	0	0	0.0658978	0.0394758	0.0403401	0	0	0	0	0.0401283	0.0207621	0.0209709	0.0234749	0.0648414	0	0.0264041	0	0	0	0	0	0	0	0
gene5145	LOC109408065	uncharacterized LOC109408065	0.134576	0	0	0.449199	5.1409	0.684826	645.829	145.664	7.72011	172.723	203.521	162.137	1764.13	9589.81	2929.39	2913.82	0.0483413	0.0778911	0.045539	0.0469128	0.102273	0.938049	1.54516	0.0401891	0.113769	0.740305	0.939126	4.55852	0.0443481	0.349506	0.132169	0.763404	0	1.17308	0.0207874	0.0698083	0.0642739	0.0202309	0	0.423434	0.0447451	0	0	0.0929975	0.570706	0	0.564349
gene5148	LOC109408140	mucin-2	0.0770976	0	0.0269561	0.0257342	0.0041042	0	17.7486	4.3654	0.446359	0.0525556	0.160026	0.0453624	142.145	726.084	0.441499	0.296979	0	0.0230553	0	0.0447932	0	0.0497592	0.0888764	0	0	0.0831596	0.0560434	0.321383	0	0	0.0105165	0.0788267	0.00949497	0.0294757	0.0141914	0	0	0	0	0.00796714	0	0.0099996	0	0	0.0108984	0	0
gene5155	LOC109408142	mucin-2-like	0.0411266	0.00433429	0.0118349	0.0176628	0.013136	0.0242328	0.86833	3.98643	0.208307	0.144287	0.0845422	0.0237767	125.582	321.223	0.145769	0.0818804	0.0233908	0.0154723	0.0190195	0.00597357	0	0.0283483	0.0759505	0.00511742	0.00579463	0.057003	0.062681	0.177496	0.0180704	0.0111259	0.0149222	0.0774323	0.0219819	0	0.0299633	0.00592596	0.0163684	0.0198873	0.0133308	0.00634322	0.0337295	0.0106683	0.00558015	0.0132627	0.0174408	0.0111206	0.00684386
gene5249	LOC109408199	elongation of very long chain fatty acids protein AAEL008004	0	0.24633	0	0.0260059	0.0373277	0.0912931	2.15483	4.45079	0.251311	0.0132776	0.0549118	0.0133002	142.455	168.681	0.0390531	0.145726	0.367325	0.0187893	0.280121	0.101849	0	0	0.0269444	0.0290838	0	0.0315141	0.0141588	0.0434063	0	0	0.0637651	0.0789222	0.0863569	0	0.240693	0.31995	0.294584	0.0146406	0.26517	0.342479	0.307618	0.0303155	0.0792841	0	0	0.268608	0.466748
gene5291	LOC109408264	uncharacterized LOC109408264	0	0	0	0.0427357	0	0.0153084	0.101817	0.4931	0.0453826	9.12167	36.1045	16.0088	15.8059	13.5579	8.61307	18.0522	0.680827	0.125271	0.253759	0.184903	9.93291	21.1019	34.8701	7.18884	1.22926	0.915896	1.64532	2.39736	0.718012	0.526228	0.395192	0.685523	0.33518	2.4048	0.41319	0.415087	0.331221	0.482555	0.136952	0	0	0.0405658	0	0	0.166765	0.0244813	0.0639176
gene5326	LOC109408299	protein D3-like	0.205249	0	0.0506261	0	0	0.078531	24.2769	0.881586	0.378315	0.0599628	0.0826623	0.0800864	0.104481	249.938	66.8499	30.1148	0.105325	0	0	0.0511064	0	0	0.0405611	0	0.099151	0	0.0852563	0.152465	0.0724687	0.0951872	0	0	0.0433328	0.269041	0.135874	0	0.0466796	0	0	0.0542689	0	0	0.143222	0.506554	0.0994756	0	0
gene5381	LOC109408340	protein cortex%2C transcript variant X1	0.250876	0	0	0	0	0	2.10055	0.887403	0	19.6568	15.3102	17.0803	16.9792	18.6119	21.0572	20.2232	0.198788	0.0711783	0.224717	0.0385827	21.3983	9.08637	6.48156	1.03566	0.474075	0.752112	0.311094	0.394641	0.376892	0.371284	0.39857	0.239181	0.109047	0.699608	0.0911802	0.127584	0.234938	0.332773	0.071752	0	0	0.0114842	0.0360417	0.0917813	0.025033	0	0.0884078
gene5403	LOC109408375	general odorant-binding protein 45	0.16238	0	0.0467275	0	0	0	2.02143	0.813697	0.10744	0.00737936	0.0762966	0.369596	19.5603	218.126	0.108524	0	0	0	0	0.0471708	0	0	0.0374376	0	0	0	0	0.241242	0	0.087857	0	0	0.0399959	0	0	0	0.0215425	0	0.0526339	0.10018	0	0	0	0.0374036	0	0.0439076	0.432345
gene5406	LOC109408377	general odorant-binding protein 45-like	0.0561657	0.0591924	0	0	0	0	0.217674	0.05629	0.111488	0.11486	0.0395854	0.0767038	9.90673	59.6075	0.112612	0.0700348	0.0504383	0	0	0	0	0.0434996	0	0	0.0474816	0	0.0408277	0.0417216	0	0.0455834	0	0	0	0	0.0433783	0.0971154	0	0	0	0	0	0.0437083	0	0.0388126	0.095274	0.318931	1.31786
gene5408	LOC109408379	general odorant-binding protein 45	0.884164	0	0	0.0173602	0.0332241	0	8.9239	2.2153	0.748477	0.0531806	0.0733125	0.017757	83.3198	805.935	0.173799	0.324263	0.046706	0	0.131996	0	0	0.0805616	0.10792	0	0	0.0420743	0	0.347709	0	0.0422104	0	0.084295	0	0	0	0	0	0	0	0.0481307	0	0	0	0	0	0.464093	0
gene5419	LOC109408396	uncharacterized LOC109408396	0.650143	0	0	0.0420018	0.0267945	0.0421275	4.41866	2.75346	0.124889	24.4467	38.5938	46.6281	76.9232	82.3059	79.852	101.924	5.36761	0.971083	10.6452	0.968691	133.546	210.702	235.691	46.3466	42.2144	46.2324	28.0358	33.6037	35.368	17.6847	7.24337	10.9281	3.70381	47.7878	5.99308	6.07406	5.3087	9.96279	3.3854	1.26153	0.714739	0.832358	0.426836	0.0869562	0.106726	0.0340256	0.48162
gene5488	LOC109408513	uncharacterized LOC109408513	0.902442	0.171193	0.0779078	0.0963916	0.0230594	0.16919	0.826674	2.4239	0.0179133	0.529048	2.6332	2.23071	74.1644	0.650654	0.289503	0.596401	0.259333	0	0.167956	0.0471881	0.246895	0.0978501	0.137321	0.1078	1.61737	1.4455	0.905278	0.563103	0.669126	0.336909	0.295434	0.32178	0.0800211	0.634835	0.069698	0.218456	0.143669	0.217063	0.0175511	0.0501082	0.105018	0.210685	0.352643	0.124724	0.153082	0.204977	0.414483
gene5493	LOC109408440	nucleolin	0.384384	0.142976	0.0195199	0.075472	0.0288878	0.0908375	0.207124	4.44153	0.336615	0.169546	0.350593	0.247031	151.732	255.369	0.347565	0.310136	1.1777	0.196303	0.286921	0.0197051	0.0687332	0.157606	0.281504	0.337618	0.0382296	0.201206	0.115053	0.319124	0.204906	0.256909	0.407118	0.659639	0.116955	0.086445	0.157166	0.0977402	0	0.322914	0.0879489	0.0209245	0.131562	0.0703832	0.0920366	0.0312499	0.0383548	0.201761	0.0451519
gene5494	LOC109408441	uncharacterized LOC109408441	0.210937	0	0	0.0176021	0	0	0.260114	1.84979	0.0785075	0.0898693	0.111501	0.126031	63.294	86.8868	0.26433	0.263025	0	0	0	0.0459574	0	0.040842	0.0182373	0.0196853	0.0222904	0.0639908	0.0383334	0.058759	0	0.0427985	0.0431593	0.0641021	0	0	0.0203641	0	0	0.0198189	0.02564	0.0244006	0.0657509	0	0.064396	0.0182207	0	0	0
gene5589	LOC109408583	phenoloxidase 2-like	0.241505	0.12726	2.31236	48.6013	184.169	8.79088	2.45208	6.22701	12.5511	0.142179	1.57059	0.577178	0.169504	0.107928	0.0880394	0.191635	0.0492904	0.0105894	0.0185732	0.0287003	0	0.161537	0.189819	0.188499	0.0835218	0.0710438	0.0957565	0	0	0.160366	0.287498	0.124543	0.105451	0.100725	0.0593475	0	0.0262143	0.0990151	0.0213495	0.132064	0.0182495	0.0939699	1.00985	0.0986163	0.0744847	0.204814	0.0219211
gene5751	LOC109408730	uncharacterized LOC109408730	0.371505	0.110116	0.0300675	0.131754	0.170573	0.380898	3.98396	0.8261	0.576117	10.2564	9.39334	11.3679	25.4622	31.3445	30.586	34.2943	1.47002	0.257579	1.16873	0.485644	56.3422	72.1291	84.3944	8.69349	4.17116	5.24999	1.81441	2.21634	2.24765	1.79021	1.10218	2.89769	1.46695	3.56857	1.00423	1.5758	0.942602	2.20776	0.496731	0.386772	1.57296	3.99328	3.94116	2.08588	2.92445	0.0659235	0.0927329
gene5821	LOC109408781	general odorant-binding protein 45-like	0.0479076	0	0	0.0399774	0	0.0320776	23.6559	40.8755	3.0036	0.0924206	0.711769	0.130852	1342.25	2532.18	0.112064	0.224016	0.0430223	0	0.0405284	0	0.0120146	0.417418	0.568947	0.0268253	0.0202502	0.342214	0.263972	1.24555	0.0197342	0.0388812	0	0.206928	0.0177002	0.0183159	0	0.0517728	0	0	0	0.0443346	0	0	0	0.033106	0	0	0
gene5822	LOC109408834	general odorant-binding protein 45-like	0.107309	0	0	0	0	0	1.41778	2.84998	0.213006	0.0731499	0.132354	0.0549557	114.282	176.957	0.035859	0.0836294	0	0	0	0	0	0.062332	0.037111	0	0	0.0651073	0	0	0	0	0	0.0434804	0	0	0	0	0	0	0	0	0	0	0	0	0	0	0
gene5823	LOC109408810	general odorant-binding protein 45-like	0.128262	0	0	0.00856242	0	0	7.41398	29.06	1.47666	0.343786	0.39486	0.210196	979.168	1404.95	0.285623	0.405272	0.115182	0	0.0434022	0	0.168824	0.314699	0.390342	0.0861823	0.10843	0.36648	0.170807	0.457328	0	0	0.0839784	0.0968724	0	0.0196146	0	0.0332663	0.0204193	0	0.0748345	0.0474782	0	0	0	0	0	0	0
gene6121	LOC109409129	plant intracellular Ras-group-related LRR protein 2-like	0.251934	0.0937095	0.0683187	0.164821	0.0568011	0.83689	11.0917	2.13875	0.26475	15.7594	24.9145	27.0592	41.7381	102.861	102.993	121.706	3.46019	0.486053	6.06788	0.641366	173.961	222.581	222.216	13.7859	9.06621	14.2106	5.8172	7.32789	6.80461	3.67245	3.55374	6.52524	3.47136	17.088	2.79272	3.74962	2.78797	5.37644	0.95112	0.0685717	0.0492735	0.069196	0	0	0	0.0800644	0.498059
gene6622	LOC109409691	venom carboxylesterase-6-like	0.168662	0	0	0.0241274	0	0.258129	4.17663	0.0362219	0.0478273	0.180672	0.135854	0.139847	0.973041	53.5725	0.619973	0.255377	0.0865503	0.0464855	0.0509582	0.0314973	0.0183109	0.0279914	0.0416635	0	0	0.0389836	0.0262721	0.0715927	0.0198502	0.068442	0.0197197	0.0390514	0.0623148	0.0736941	0.00930445	0.11457	0.0191793	0.072443	0.0468602	0	0	0.243756	0	0.0666011	0.0102179	11.672	16.2388
gene6676	LOC109409805	general odorant-binding protein 67-like	0.571085	0	0	0	0	0	0.247639	2.68564	0.261598	0.0898372	0.123846	0.149983	103.522	202.155	0.0587191	0.0821658	0	0	0.0743262	0	0	0.0340229	0.121538	0.0327971	0	0	0	0.0652645	0	0	0	0	0	0	0	0	0	0	0	0	0	0	0	0	0	0	0
gene6681	LOC109409727	serine protease nudel-like	1.93117	0.0141829	0.00772595	0.00148236	0.0100153	0.00901087	0.0213365	1.76908	0	0.364656	1.80925	25.5257	57.1755	0.0624806	0.0344927	0.0440495	0.03825	0.00649093	0.0379681	0.0263884	0	0.0173539	0.010844	0.0100473	0.0341306	0.0507871	0.0782605	0.0499837	0.0378622	0.0154547	0.0945562	0.0917721	0.0629969	0.0240275	0.0484866	0.0174521	0.0713975	0.0657505	0.0534583	0	0.0167794	0.00523639	0.0273894	0.0333396	0.0142676	0.0290934	0.0223724
gene6788	LOC109409948	general odorant-binding protein 45	0	0	0	0.0162601	0	0	12.689	0.0976436	0.0966964	0	0.0171667	0.010977	4.90286	182.336	1.25182	0.55428	0	0	0	0	0	0	0	0	0	0	0.0116856	0.0452328	0	0	0	0	0	0.0186242	0	0	0	0	0	0	0	0	0	0	0.0103292	0	0
gene6789	LOC109409929	general odorant-binding protein 45-like	0	0.00599767	0.016079	0.0172689	0	0	5.58284	0.0129627	0.102695	0	0	0	2.26753	88.5044	0.737527	0.338686	0.00650447	0	0	0	0	0	0	0	0	0	0	0	0	0.0209942	0	0.00461185	0.00382295	0	0.0043953	0.0049201	0.0057655	0	0	0	0	0	0	0	0	0	0
gene6797	LOC109409950	general odorant-binding protein 45	0.0918009	0	0	0	0.00307491	0	13.6551	0.707432	0.0836042	0.117188	0.0290791	0.028173	13.2184	123.629	0.0620428	0.0649518	0	0	0	0	0	0	0	0	0	0.0139072	0	0.0403536	0	0	0	0.0278627	0	0	0	0.00743126	0	0.00852837	0.0056838	0.031818	0	0	0	0	0.00495745	0	0
gene6798	LOC109409930	general odorant-binding protein 45	0.0594683	0	0.0109699	0	0	0	27.9512	0.659675	0.157391	0	0.00716463	0.00694138	12.7354	166.502	0.309804	0.0893638	0.0456445	0	0	0	0	0	0	0	0	0.020559	0	0.0218986	0	0	0	0	0	0	0	0	0	0.0126075	0	0	0	0	0	0	0.0107774	0	0
gene6912	LOC109409990	uncharacterized protein DDB_G0281025-like%2C transcript variant X2	0.0161633	0.0851718	0.11163	0	0.0103252	0	0.261957	2.42436	0	1.23403	0.61516	0.441475	83.132	9.02274	0.561728	0.675178	0	0	0	0	0.233386	0.0876279	0.156515	0.0603364	0.0136642	0.104605	0	0.0360198	0	0	0	0.0130984	0	0.024718	0.0249667	0	0	0.0121492	0.0628702	0	0	0	0.0526338	0.268067	0.329015	0.327792	0.451875
gene7264	LOC109417381	regucalcin-like	0.316641	0.0682811	0.0210274	0.0757721	0.0311188	0.0107638	14.4455	0.170876	0.104916	1.4113	0.549336	0.388186	0.578611	104.378	0.379942	0.207438	0	0.0155073	0	0.127361	0.0803348	0.559511	0.140503	0.0483709	0.048183	0.0918211	0.0885273	0.0662208	0.153709	0.0857924	0.10645	0.0659262	0.0118788	0.211198	0.0124156	0.0349558	0.0259802	0	0.0473705	0	0.0133624	0.0379094	0	0.0168316	0	0.098792	0.0812269
gene7301	LOC109410504	general odorant-binding protein 45-like	0.225693	0	0	0	0.048058	0.151118	0.38875	9.14824	0.0497775	0	0.0530226	0	288.351	26.9288	0.0335196	0.0625387	0	0.0483809	0	0	0	0.0388437	0.0346899	0	0.0423994	0	0.0182289	0.0558839	0	0	0	0.0406437	0	0	0	0	0	0	0	0	0	0	0	0	0	0.0610275	0
gene7302	LOC109410505	uncharacterized LOC109410505	0	0	0	0	0	0	17.1646	2.82309	0.639019	0	0.0378155	0.0183186	83.0551	284.902	0.0179295	0.0167259	0	0	0	0	0	0	0	0	0	0.0651073	0.0195011	0.0597842	0	0	0	0.0217402	0	0.041026	0	0	0	0	0	0	0	0	0	0	0	0	0
gene7530	LOC109410676	C-type lectin 37Db-like	0.339653	0.46023	72.8866	44.5065	34.6845	49.6755	82.0579	239.402	159.851	0.42999	0.34198	0.0993972	0.0576328	0.0795088	0.194572	0.242014	0	0.0936127	0	0.0422863	0	0.150318	0	0.434708	0.0410196	0	0	0	0	0	0.0794233	0	0.0717086	0.148406	0	0	0	0	0.0471837	0.224515	0	0	0.0395013	0	0.123462	0	0.581364
gene7565	LOC109410744	uncharacterized LOC109410744	0.408459	0.0340967	0.108231	0.0701941	0.018084	0.0622806	1.02589	1.16324	0.124427	119.374	90.7224	118.509	35.0297	11.8974	22.1011	25.0576	0.192483	0.0858258	0.0718458	0.116306	4.42876	3.76797	3.05175	0.884655	0.246158	0.261728	0.279277	0.20428	0.203237	0.118159	0.135704	0.186806	0.0926388	0.120599	0.212392	0.0839123	0.125547	0.14591	0.110113	0.0449104	0.110932	0.037766	0.0329232	0.04192	0	0.0164031	0.133251
gene7603	LOC109410781	uncharacterized LOC109410781	0.820634	0.890706	0.756214	0.748871	0.274835	0.633809	2.03365	1.2383	0.81136	24.6286	12.8651	16.4288	13.2811	17.1723	20.0895	18.1123	3.82005	1.58911	2.19705	1.62047	15.7079	6.6652	4.77681	1.09001	0.379302	0.581817	0.348535	0.31507	0.243083	0.506322	0.727021	0.759621	1.50126	0.378324	1.3032	1.38435	1.23056	0.889484	1.15074	0.338415	0.459862	0.179387	0.120103	0.86873	0.284196	0.478704	0.230159
gene7750	LOC109410919	cell surface glycoprotein 2-like	0	0	0	0.0411082	0	0	0.130173	6.7269	0.427812	0	0.0434003	0.0630718	267.276	418.43	0.0411548	0.038392	0.0276495	0	0	0	0	0.0953833	0.0425917	0	0	0.149445	0.0223811	0.182969	0	0	0	0.0249509	0.0682533	0	0	0	0	0.0462855	0	0	0	0	0	0	0	0	0
gene7935	LOC109411134	elongation of very long chain fatty acids protein AAEL008004	0	0.170849	0	0.0405833	0.0129448	0.0135683	1.9705	4.30549	0.301678	0.0690676	0.0571282	0.013837	139.769	161.388	0.0677156	0.0758037	0.218372	0.0195476	0.102857	0.0353198	0	0	0.0280319	0.0302577	0	0.032786	0.0147303	0.0752638	0	0	0.0331694	0.0492647	0.11979	0	0.156505	0.157672	0.306474	0.0456946	0.275873	0.243785	0.286347	0.0315391	0.115478	0	0	0.312326	0.161862
gene8107	LOC109411344	mucin-6-like	0	0	0	0	0	0	2.41228	0.159579	0	0.162812	0.0561113	0	0.0472813	99.2772	12.1315	0.446727	0	0	0	0	0	0	0	0	0	0	0	0	0	0	0	0	0	0	0	0	0	0.0598416	0	0	0	0	0	0.165048	0	0	0
gene8188	LOC109411425	uncharacterized LOC109411425	0	0	0	0	0	0	0.230362	11.918	0.851715	0	0.172808	0.223231	387.066	585.38	0.191179	0.0764333	0	0	0	0	0	0.126597	0.113059	0	0	0.19835	0.0594104	0.242844	0	0	0.0334449	0.0662318	0	0.124986	0	0	0	0.0307161	0	0.0756339	0.0339676	0	0	0	0.138638	0	0
gene8199	LOC109411431	general odorant-binding protein 45-like	0	0	0	0	0	0	10.3196	0	0.149332	0	0	0	3.42536	90.3059	0.82123	1.36022	0	0	0	0	0	0	0	0	0	0	0	0.037256	0	0	0	0	0	0	0	0	0	0	0	0	0	0	0	0	0	0	0
gene8201	LOC109411430	general odorant-binding protein 45	0.1272	0.026811	0	0	0	0	67.2057	0.203971	0.201992	0	0.0358602	0.0694855	6.72328	441.064	0.0510073	0.0317221	0	0.0245407	0	0.177366	0	0	0.0527881	0	0	0.0823211	0.0184928	0.415749	0	0	0	0	0	0.0194524	0	0	0	0	0	0	0	0	0	0	0	0	0
gene8211	LOC109411477	uncharacterized LOC109411477	0.737001	0.107133	0.0219397	0	0.032469	0.0170164	0	0.305641	0	3.06634	15.5831	25.4169	9.67455	0.661578	0.883213	0.47534	0	0	0.0644979	0.0442958	0.212448	0.354288	0.439447	0.170762	0	0	0.147789	0.0755126	0.125622	0.123753	0	0.0205948	0.0375581	0.077729	0	0.0878854	0.101147	0.0382047	0.0494259	0.0470368	0	0	0	0	0.0215548	0.185541	0.685114
gene8276	LOC109622327	chymotrypsinogen B-like	0.294366	0.55398	1.83334	6.23221	5.05028	19.7896	41.0996	15.9802	38.3003	0	0.0889149	0	0.0374613	0	0.0421573	0	0	0	0.0533624	0	0	0	0	0	0	0.0510285	0.0152842	0.0312377	0.0346446	0	0	0.0170391	0.0155368	0.0643092	0	0.036356	0	0.0158043	0	0	0	0.0163626	0.0684689	0.0435896	0.0713334	0.119395	0.104968
gene8292	LOC109622325	uncharacterized LOC109622325	0.202141	0.0213034	17.5904	8.64993	6.75344	5.90118	18.1039	25.4451	32.6615	0.0964562	0.0142468	0	0	0	0.0270195	0	0	0	0	0	0.0307238	0	0.0139814	0.0452746	0.0341774	0	0	0.0300313	0	0	0.0330876	0.0327621	0.0448105	0.0463692	0	0	0	0	0.0393133	0	0	0.0314613	0	0	0	0.114784	3.12835
gene847	LOC109408572	proto-oncogene serine/threonine-protein kinase mos	0.20569	0	0.0236763	0.0183085	0	0.0183633	1.80691	1.979	0	49.1123	41.1618	49.2708	51.4768	16.5303	18.6134	26.0671	0.172401	0.0264558	0.301613	0.0717028	22.3637	8.48562	5.79509	1.96564	1.72728	1.28681	1.14632	1.49737	1.07323	0.57871	0.381577	0.244474	0.303982	1.70909	0.232995	0.177828	0.229222	0.40198	0.0800071	0	0.0227966	0	0	0	0.0465218	0	0.369672
gene8621	LOC109411824	contactin-associated protein 1	0	0	0.00622483	0.0141575	0	0	23.73	12.0716	0.822982	0.0433697	0.121668	0.169429	401.472	1037.57	0.0606629	0.063466	0.0125696	0.0102288	0.0179408	0.00924101	0	0.130742	0.180422	0	0	0.154405	0.0616638	0.421248	0	0	0.023258	0.114459	0.0103427	0.0162159	0	0	0	0	0.00701165	0	0.017628	0.0165037	0.0776916	0	0.0179871	0.00860172	0.0211747
gene8622	LOC109411823	uncharacterized LOC109411823	0.195362	0.0316754	0.18604	0.0987169	0.00479993	0	18.5468	19.5734	1.75251	0.0665867	0.533815	0.241556	676.642	1763.32	0.402547	0.276021	0.167343	0.152214	0.0317827	0.0196449	0.0114205	0.191576	0.221397	0	0.114339	0.263322	0.207555	0.709529	0.0247612	0.0146357	0.00418173	0.117642	0.00732899	0.057454	0.0232128	0.0311813	0.0638781	0.0451828	0.00496855	0.0834422	0.212355	0.0584735	0.0428192	0	0.152951	0.00609529	0.0600186
gene8623	LOC109411826	contactin-associated protein 1-like	0	0	0.00641849	0.0729899	0	0	23.6772	9.69983	0.765247	0.0521721	0.192032	0.12244	364.146	943.093	0.288783	0.0553518	0.0864041	0.572915	0.17574	0.231733	0	0.140229	0.0499118	0	0	0.153194	0.0794779	0.327471	0.0180152	0.0390437	0.0418783	0.053162	0.0268228	0	0.0675544	0.00756205	0	0.032873	0.00722979	0.263072	0.496944	0.365868	0.151316	0.0151111	0.0185467	0	0.0109167
gene8624	LOC109411828	general odorant-binding protein 69	0.0466362	0	0	0.0466997	0	0	0.377913	13.3207	0.416574	0.0317907	0.065738	0	452.864	319.935	0.0311684	0	0.293163	0	0	0	0	0.0361191	0.0161283	0	0	0.0565909	0.118652	0.294463	0	0	0	0.0755858	0	0	0	0.0201595	0	0	0	0	0.0581475	0.0362924	0	0	0	0	0
gene8625	LOC109411827	uncharacterized LOC109411827	0.0214852	0	0.0248545	0.186459	0.0274497	0.0143859	261.562	37.5583	4.84393	0.0292919	0.598137	0.401101	1266.53	5162.03	0.363002	0.343724	0.0127342	0.0207256	0	0.0187241	0.0163279	0.459597	0.482969	0	0.236122	0.538808	0.687188	2.52964	0	0.0697485	0.0235627	0.591979	0.0422304	0.19714	0	0.0185749	0.0400193	0	0.0488888	0	0	0	0	0	0.0364454	0	0.0750823
gene8974	LOC109412231	glucose dehydrogenase [FAD%2C quinone]-like	0.0102077	0.0053789	0	0.0204432	0	0	0.00719283	0.818424	0	0.417501	1.07196	0.899153	26.3302	0.457192	0.518482	0.56641	0.210836	0	0.0345416	0	0.356842	0.339946	0.345956	0.114314	0.00862943	0.123866	0.0296805	0.037913	0.00840957	0.0165689	0.0417714	0.0496326	0.0150856	0.0546361	0.0157674	0	0.0325014	0.0383632	0.0297786	0	0	0	0	0.176348	0.181811	0.0372622	0.0407678
gene9019	LOC109622413	vitellogenin-A1-like	0.0530166	0.0272744	0.0148734	5349.68	13354.9	743.323	13.1964	3.41257	6.84759	0.0302427	57.6281	3.59996	1.64345	0.0424071	2.56642	0.731476	0.0232407	0.0071328	0.0187659	0.00966598	0	0.00572672	0.00511433	6.82047	0.0125019	0.0179451	0.00671871	0.0384485	0.00304585	0.00750132	21.0078	0.0439222	1.03583	0.0339232	0.0075953	0.0266573	0.0127722	0.0185077	0.00719029	10.5597	0.0307312	0.0297492	0.0361175	0.0834412	1.22449	1.01321	0.548174
gene9020	LOC109622414	vitellogenin-A1-like	0.374531	0.00539711	0.0593876	1679.86	4401.55	122.103	3.04485	1.19625	1.69291	0.0139117	20.673	1.24218	0.456205	0.00697212	0.671753	0.162026	0.0995288	0.0184331	0.0398962	0.0277773	0.00290437	0.00591978	0.00354212	2.19318	0	0	0.00833425	0.00380414	0.00207803	0.00415625	6.81128	0.0206264	0.1704	0.00976027	0.00785135	0.00442745	0.0152106	0.00764117	0.0148654	3.44023	0.0127069	0.00791109	0.012445	0.0677674	0.357658	1.90662	0.188274
gene9021	LOC109622415	vitellogenin-A1-like	0.370767	0.00942627	0.0626966	1955.83	4937.77	140.531	3.47626	1.31519	1.96632	0.0139139	24.0463	1.43812	0.524377	0.0132366	0.78426	0.20018	0.0926791	0.0221232	0.043136	0.0344439	0	0	0.00354267	2.55024	0	0	0.00833554	0.00380473	0.00207835	0.0041569	7.50682	0.0206296	0.170427	0.00976178	0.0108047	0.00442813	0.0152129	0.00764236	0.0223015	3.79449	0.0127088	0.00791231	0.012447	0.075702	0.412826	2.14877	0.276081
gene910	LOC109409141	serine/threonine-protein kinase Nek5-like	0.629707	0.132728	0.0543626	0	0.0536348	0.084327	2.8694	3.02929	0.0624979	8.09863	21.8505	15.9668	25.9538	31.7122	27.117	30.6622	0.508944	0.242978	0.728041	0.219513	38.7468	12.29	3.57149	0.861905	0.337152	0.322629	0.274646	0.436581	0.38044	0.40885	0.549729	0.714421	0.480821	0.353097	1.13479	2.4317	2.4227	0.425989	2.95965	0.641017	0.366398	0.392032	0.017088	0.812284	0.836737	0.936501	1.78142
gene9344	LOC109412644	uncharacterized LOC109412644	0.845645	0.0448309	0.246888	0.179623	0.00818489	0.0943701	0.282773	0.102729	0.216182	30.6073	13.624	1.08488	1.05009	3.38724	4.31003	6.854	0	0	0.0216785	0.0223324	0	0	0.0177243	0	0.0216635	0.0207303	0	0.0380709	0	0.0207974	0	0.0415328	0.0568066	0	0.0395827	0.110772	0.040796	0	0	0	0.0639016	0.139593	0	0.0531248	1.09759	0.155906	1.71427
gene9376	LOC109412659	serine protease SP24D-like	1.33823	0	985.986	519.169	17.7794	43.636	84.4899	1335.26	812.298	1.02869	0.0401352	0	0.0169096	0	0.266411	0.106511	0	0.549325	0	0.880891	0	0	0	0.513579	0	0.0230337	0	0.0211505	0.0469145	0.0231082	0.023303	0	0.0525987	0.0870853	0	0	0	0	0.0276876	0.843178	0.0473345	0.0221577	0.0695387	0.0196759	0.241493	0.0923888	4.14608
gene9400	LOC109412708	vitelline membrane protein 15a-1-like	0.0846835	0	0	0.113065	0.108193	0.765474	6.00181	340.535	0.0840477	23.2927	805.339	6784.26	12211.8	94.3277	1.36794	0.941376	0.0760481	0	0	0	0	0.590276	0.995737	0	0.0715901	0.650811	1.41583	1.1952	0	0.034364	0.0346537	1.02939	0	0	0	0	0	0	0	0.117552	0	0	0	0	0.107737	0	0
gene9401	LOC109412688	histidine-rich protein PFHRP-II-like	0.383839	0	0	0.0465893	0	0.0934574	0.196706	70.1881	0	0.28544	14.9774	579.833	2544.64	1.31511	0.116605	0.0652665	0	0.168304	0	0.0608203	0.0530367	0.324303	0.193082	0	0	0.0564571	0.177557	0.103683	0	0	0	0.311054	0	0	0.0538998	0	0	0	0	0	0	0	0	0	0.0591915	0	0
gene9402	LOC109412709	vitelline membrane protein 15a-2-like	0.165105	0.0870009	0	0.330659	0.395511	1.40951	7.63019	461.109	0.245797	27.546	3048.18	12444.1	17078.1	89.7154	2.74924	1.64699	0	0	0.0698367	0.0359717	0	1.34265	0.885028	0.0616322	0.0348942	1.26886	2.57016	1.76792	0	0	0	1.47177	0.0305002	0	0.0318787	0	0.0657117	0	0.0401378	0.267384	0.0343096	0	0	0.0285234	0.0350084	0	0.0824249
gene9483	LOC109412800	L-asparaginase-like	0	0	0.121358	12.5617	0.0641428	5.75507	1.07546	169.667	30.754	0.123205	0	0	0	0	0	0	0	0.0774884	0	0	0	0	0	0	0.0339542	0	0	0	0	0	0	0.0650964	0	0.0153554	0	0	0.0319708	0	0	0.148675	0	0	0	0	0.0340653	0	0
gene9495	LOC109412818	general odorant-binding protein 67-like	0.0394873	0	0	0	0	0	0.445194	1.54341	0.0783815	0.242258	0.166983	0.0808899	71.6191	73.1809	0.0527812	0.123095	0	0	0	0	0.0600174	0.0917471	0	0.0294806	0	0	0	0	0	0	0	0	0	0	0	0.0682769	0	0	0	0	0.196936	0	0	0	0	0	0
gene9537	LOC109412842	protein trunk	0.996612	0.414599	0.249056	0.0700329	0.150783	0.386334	16.1213	9.51505	0.520594	144.377	174.327	146.091	261.546	188.994	142.667	161.832	32.8709	8.4753	45.0763	13.706	274.153	434.798	657.732	197.181	108.622	97.2143	50.7905	51.8091	40.8872	38.9945	28.126	44.7598	23.8564	103.457	23.3882	27.3073	24.2722	36.9557	15.5825	3.47069	0.414202	0.265325	0.170807	0.0724944	0.222442	0.106375	1.54498
gene9563	LOC109412861	uncharacterized LOC109412861	0.998637	0.0513392	0.0630822	0.0487804	0.0466782	0.0163088	2.47149	3.49076	0.362612	72.0927	128.115	75.3255	73.715	56.9409	64.984	78.0548	1.39989	0.446422	1.48358	0.551899	73.1898	67.3262	41.4771	3.60054	3.74757	2.69946	1.57579	1.50173	1.70564	1.46282	1.33561	1.51986	0.935903	4.15319	1.27919	1.30558	0.678588	1.39141	0.331594	0.135242	0.0809842	0	0.0198289	0.0673265	0.103292	0	0.291833
gene9565	LOC109412889	uncharacterized LOC109412889	0.232081	0	0	0	0	0	1.758	1.83168	0	35.675	68.5562	44.9073	34.3885	35.5256	37.9625	44.4212	0.963918	0.167907	1.49704	0.278102	51.192	71.3357	27.8707	3.20546	2.32984	3.8488	1.37071	1.96101	2.07929	1.62455	0.52234	1.83371	1.28619	4.36988	0.828995	1.73055	1.08533	1.94069	0.648831	0.0268465	0	0.090303	0.0472339	0	0.0738149	0	0.0579307
gene9733	LOC109413067	uncharacterized LOC109413067	0.590414	0	0	0.0291959	0.0279377	0.0292833	4.0987	1.9724	0.0434059	28.9928	45.6501	26.5634	40.2065	58.86	46.5181	59.2918	0.432021	0.168753	0.53647	0.057171	74.6986	27.8425	7.04815	0.767308	0.905822	1.0437	0.508658	0.6335	0.378319	1.04708	0.393728	0.903755	0.29085	1.10355	0.151997	0.340292	0.365533	0.525968	0.36149	0.0404726	0.0545294	0	0	0	0.0741867	0.0354773	0.589503
gene9816	LOC109402651	cathepsin B pseudogene	0.227834	0.658968	3.70537	3105.6	8603.85	3863.51	270.127	127.998	35.5734	0.213117	43.0271	3.09545	4.79076	0.202782	1.98054	0.718761	0.210567	0.0753958	0.884358	0.204344	0	0	0	3.6762	4.54262	6.21756	1.95529	2.82079	1.04635	1.8183	19.6646	5.74004	21.2102	2.04689	8.12142	6.94572	6.96806	7.41464	5.96628	7.4619	0.0162419	0.0456177	0.0318144	0.216044	1.98872	0.396267	1.41757
gene9817	LOC109413157	cathepsin B pseudogene	0.0561214	0.0444705	0.200355	2756.31	7635.01	3455.5	120.486	64.6118	21.4143	0.0719108	34.2804	2.98707	3.54397	0.218956	1.40527	0.644549	0.0378936	0	0.205258	0	0	0	0	3.76464	0.178361	0.313025	0.0714687	0.14638	0.0347634	0.970194	12.588	1.177	8.32514	0.322649	1.59428	1.15826	0.772536	1.29786	0.861688	6.24791	0.0701493	0.0656749	0.120232	0.116638	1.75366	0.119804	0.863694
gene9818	LOC109413169	cathepsin B pseudogene	0.47614	0	0	0.582742	13.6365	544.156	9.76709	1.06043	0.446311	0	0.0186434	0	0.486997	0	0	0.0329841	0	0	0	0	0	0	0	0.118493	0	0.0427981	0	0	0	0	0	0	0.86004	0	0.122579	3.84201	4.16909	0.0397657	5.99339	0.0979175	0	0	0	0	0.0673065	0	0
